# Supplementary material for: Preparation of isoquinazolines via metal-free [4 + 2] cycloaddition of ynamides with nitriles
Source: Royal Society of Chemistry journal article supplement (doi:10.1039/c9ob01395d), 2019-01-01

## Preparation of Isoquinazolines via Metal-Free [4 + 2]

### Cycloaddition of Ynamides with Nitriles

Hao Wu,<sup>a, II</sup> Yu Liu,<sup>a, II</sup> Ming-xing He,<sup>a</sup> Hao Wen,<sup>a</sup> Wei Cao,<sup>a</sup> Ping Chen<sup>\*a</sup> and Yu Tang<sup>\* a, b</sup>

<sup>a</sup> *Key Laboratory of Marine Drugs, Chinese Ministry of Education, School of Medicine and*

*Pharmacy, Ocean University of China, Yushan Road, Qingdao, 266003, P. R. China.*

<sup>b</sup> *Laboratory for Marine Drugs and Bioproducts Qingdao National Laboratory for Marine*

*Science and Technology Qingdao, 266237, P. R. China*

Email: [tangyu@ouc.edu.cn](mailto:tangyu@ouc.edu.cn)

### Contents

|                                                                          |           |
|--------------------------------------------------------------------------|-----------|
| <b>1. X-Ray crystallography .....</b>                                    | <b>S2</b> |
| <b>2. <sup>1</sup>H, <sup>19</sup>F and <sup>13</sup>C Spectra .....</b> | <b>S4</b> |

## 1. X-Ray crystallography

**Figure S1:** X-Ray crystallography and structural formula of compound **3k**.

Displacement ellipsoids are drawn at the 30% probability level.

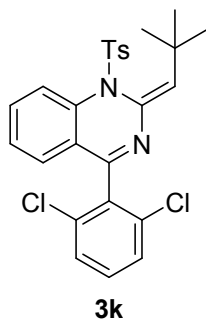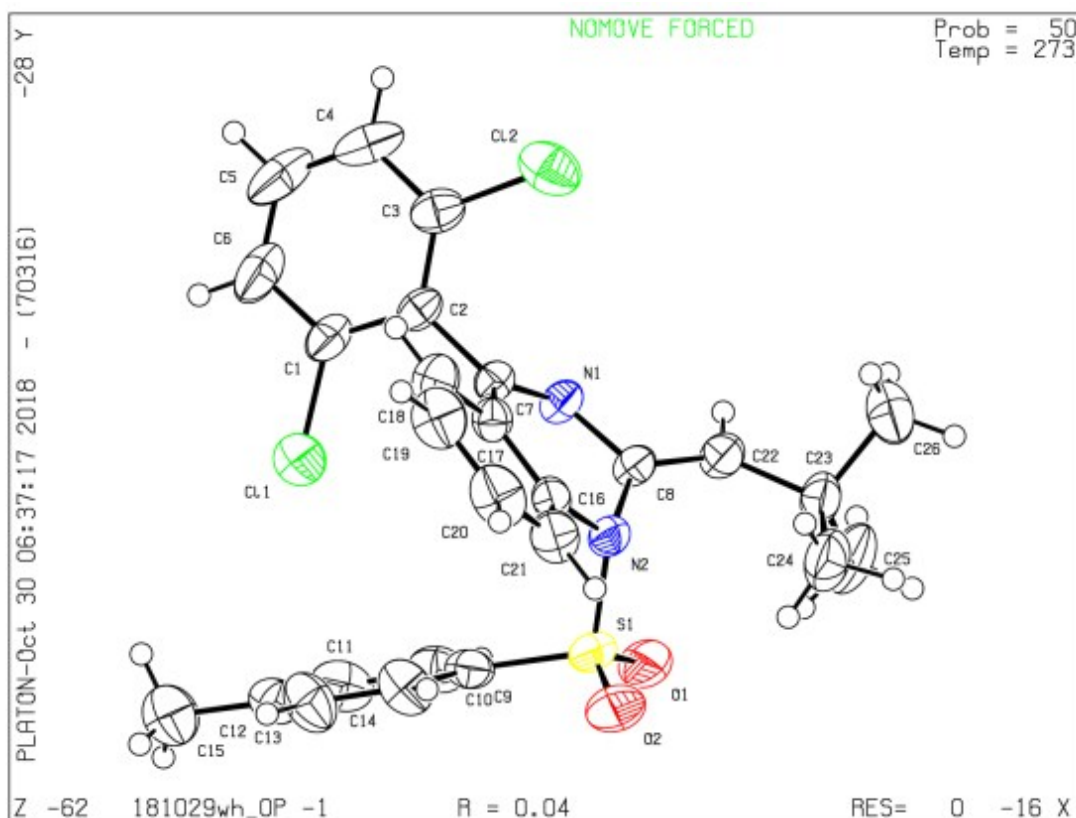

**Table S1.** Crystal data and structure refinement for C:81029WH\_.

|                                   |                                                                                 |                    |
|-----------------------------------|---------------------------------------------------------------------------------|--------------------|
| Identification code               | 181029wh_0m                                                                     |                    |
| Empirical formula                 | C <sub>26</sub> H <sub>24</sub> Cl <sub>2</sub> N <sub>2</sub> O <sub>2</sub> S |                    |
| Formula weight                    | 499.43                                                                          |                    |
| Temperature                       | 273.15 K                                                                        |                    |
| Wavelength                        | 0.71073 Å                                                                       |                    |
| Crystal system                    | Triclinic                                                                       |                    |
| Space group                       | P-1                                                                             |                    |
| Unit cell dimensions              | a = 8.7442(10) Å                                                                | α = 95.3140(10)°.  |
|                                   | b = 11.0021(12) Å                                                               | β = 106.9550(10)°. |
|                                   | c = 14.9590(16) Å                                                               | γ = 109.2400(10)°. |
| Volume                            | 1271.0(2) Å <sup>3</sup>                                                        |                    |
| Z                                 | 2                                                                               |                    |
| Density (calculated)              | 1.305 Mg/m <sup>3</sup>                                                         |                    |
| Absorption coefficient            | 0.363 mm <sup>-1</sup>                                                          |                    |
| F(000)                            | 520                                                                             |                    |
| Crystal size                      | ? x ? x ? mm <sup>3</sup>                                                       |                    |
| Theta range for data collection   | 2.529 to 27.614°.                                                               |                    |
| Index ranges                      | -11 ≤ h ≤ 11, -14 ≤ k ≤ 13, -18 ≤ l ≤ 19                                        |                    |
| Reflections collected             | 10247                                                                           |                    |
| Independent reflections           | 5439 [R(int) = 0.0205]                                                          |                    |
| Completeness to theta = 25.242°   | 99.6 %                                                                          |                    |
| Absorption correction             | Semi-empirical from equivalents                                                 |                    |
| Max. and min. transmission        | 0.7456 and 0.6983                                                               |                    |
| Refinement method                 | Full-matrix least-squares on F <sup>2</sup>                                     |                    |
| Data / restraints / parameters    | 5439 / 0 / 302                                                                  |                    |
| Goodness-of-fit on F <sup>2</sup> | 1.028                                                                           |                    |
| Final R indices [I > 2σ(I)]       | R1 = 0.0439, wR2 = 0.1046                                                       |                    |
| R indices (all data)              | R1 = 0.0693, wR2 = 0.1168                                                       |                    |
| Extinction coefficient            | n/a                                                                             |                    |
| Largest diff. peak and hole       | 0.239 and -0.297 e.Å <sup>-3</sup>                                              |                    |

**2 <sup>1</sup>H, <sup>19</sup>F and <sup>13</sup>C Spectra**

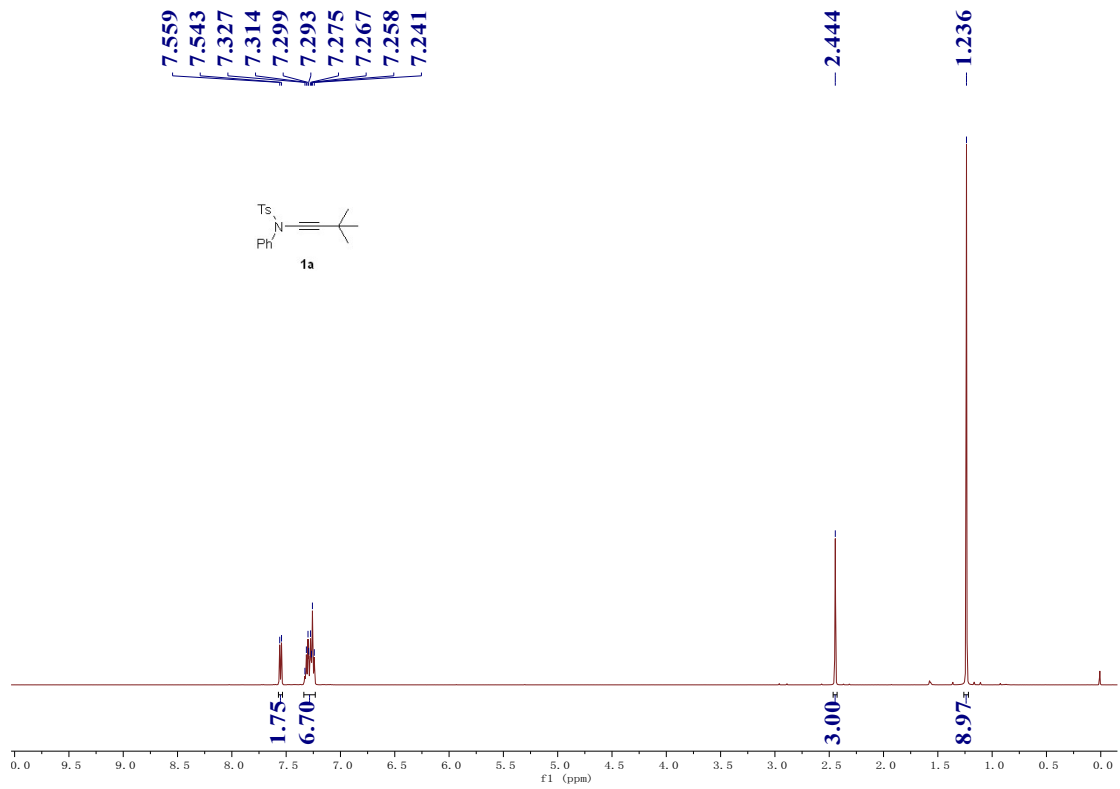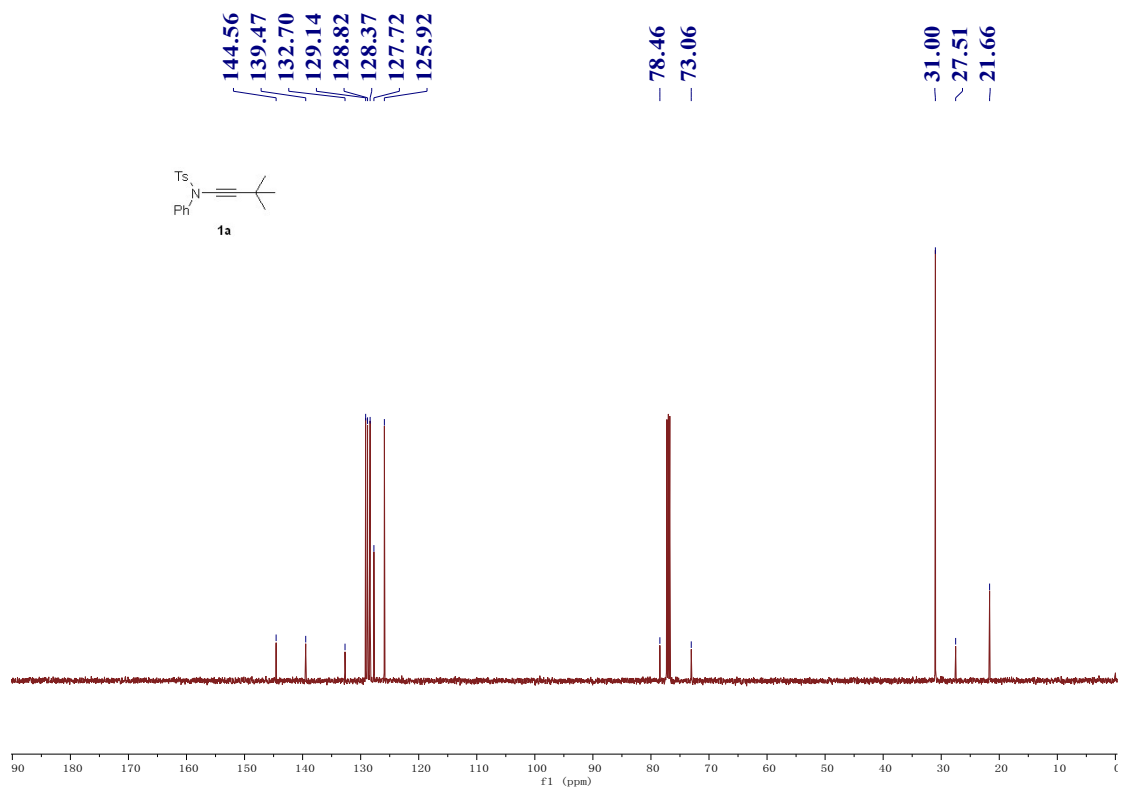

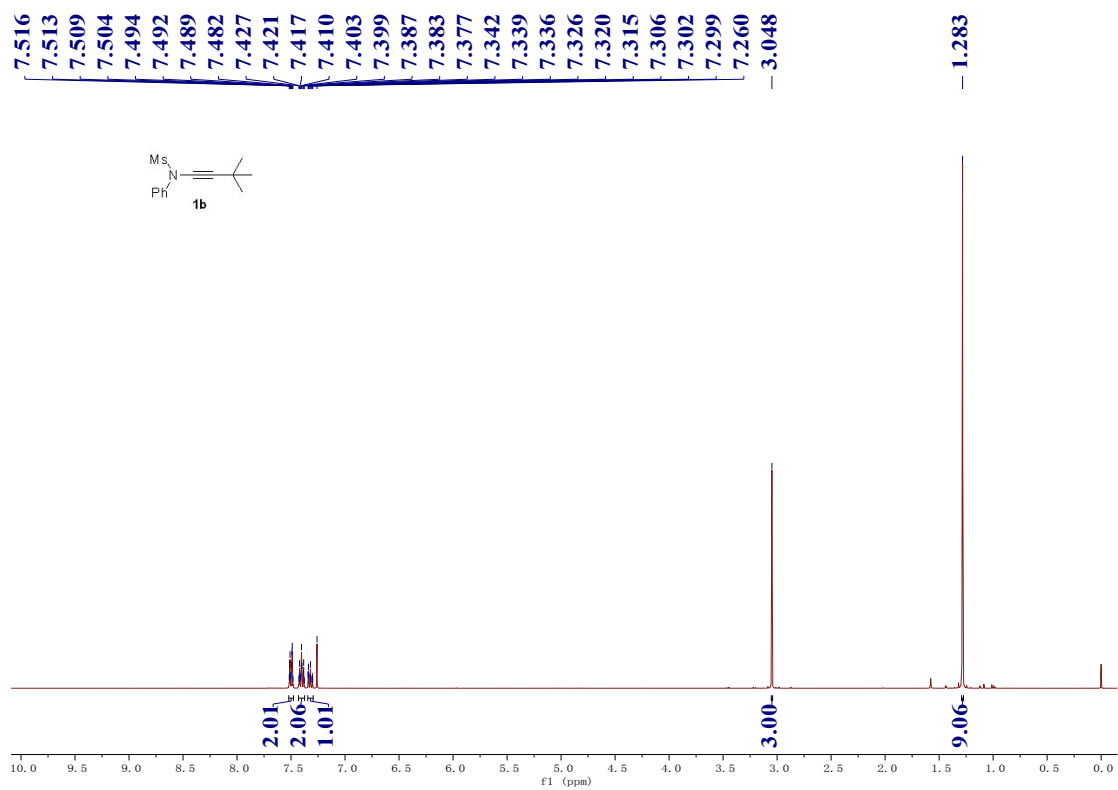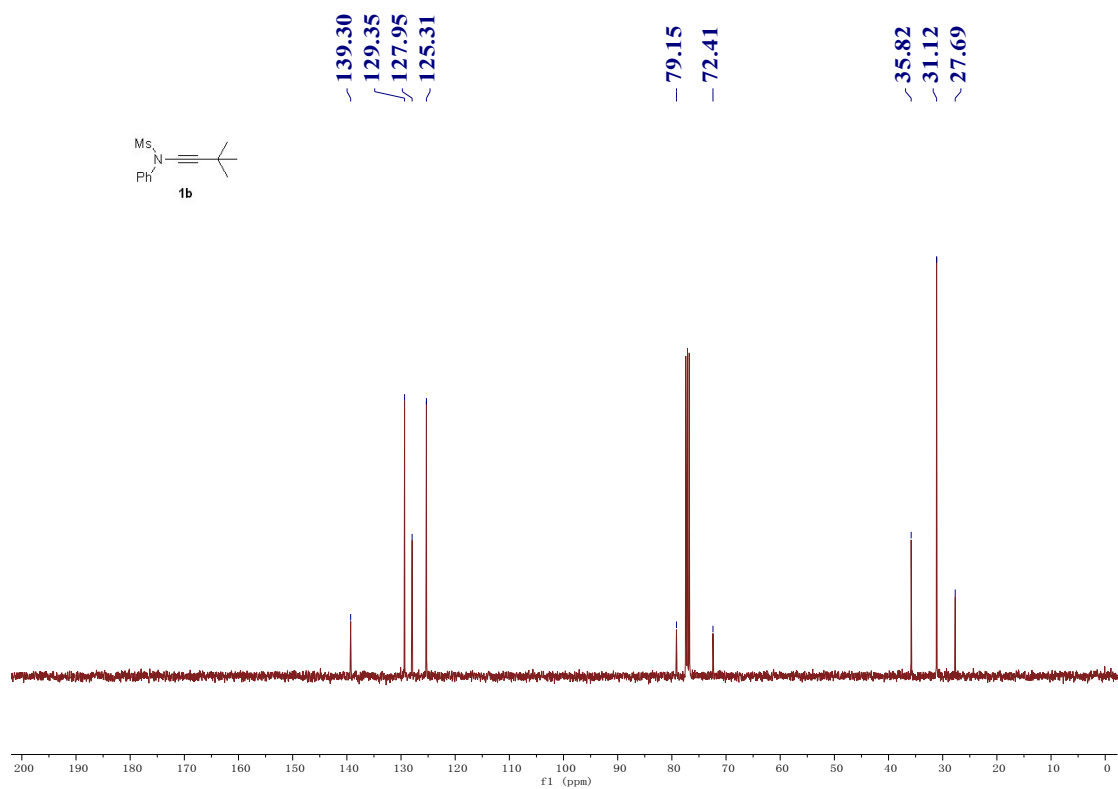

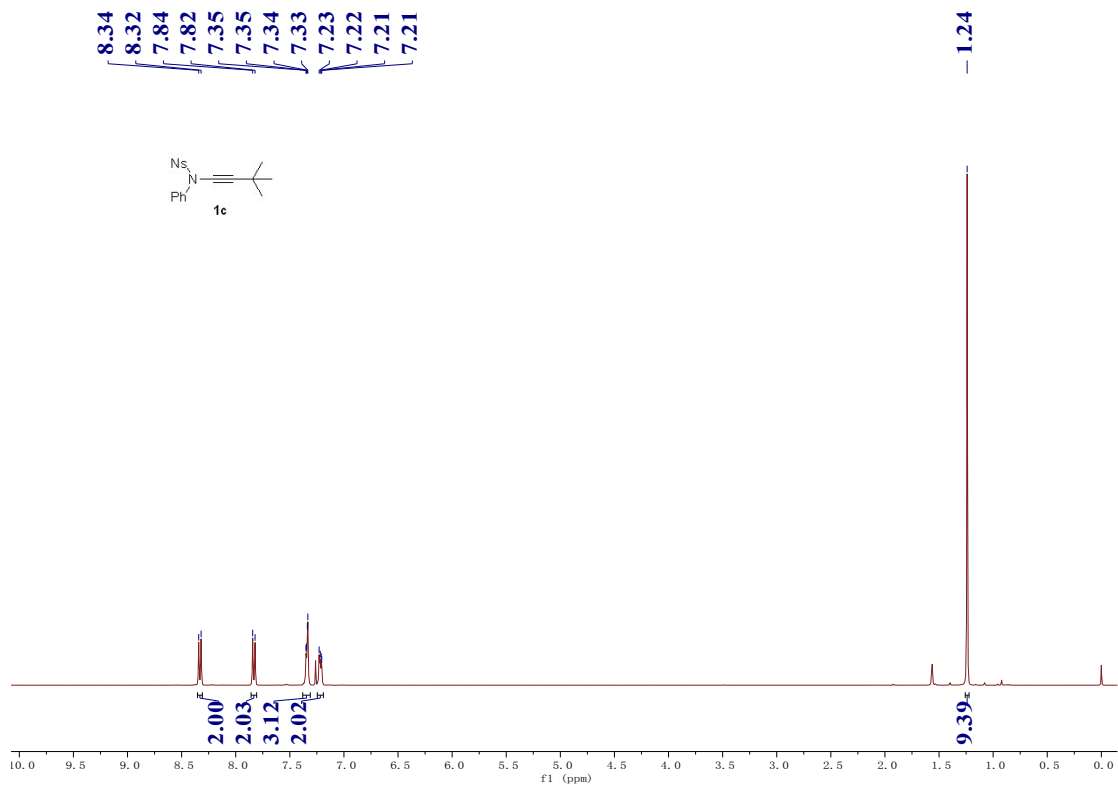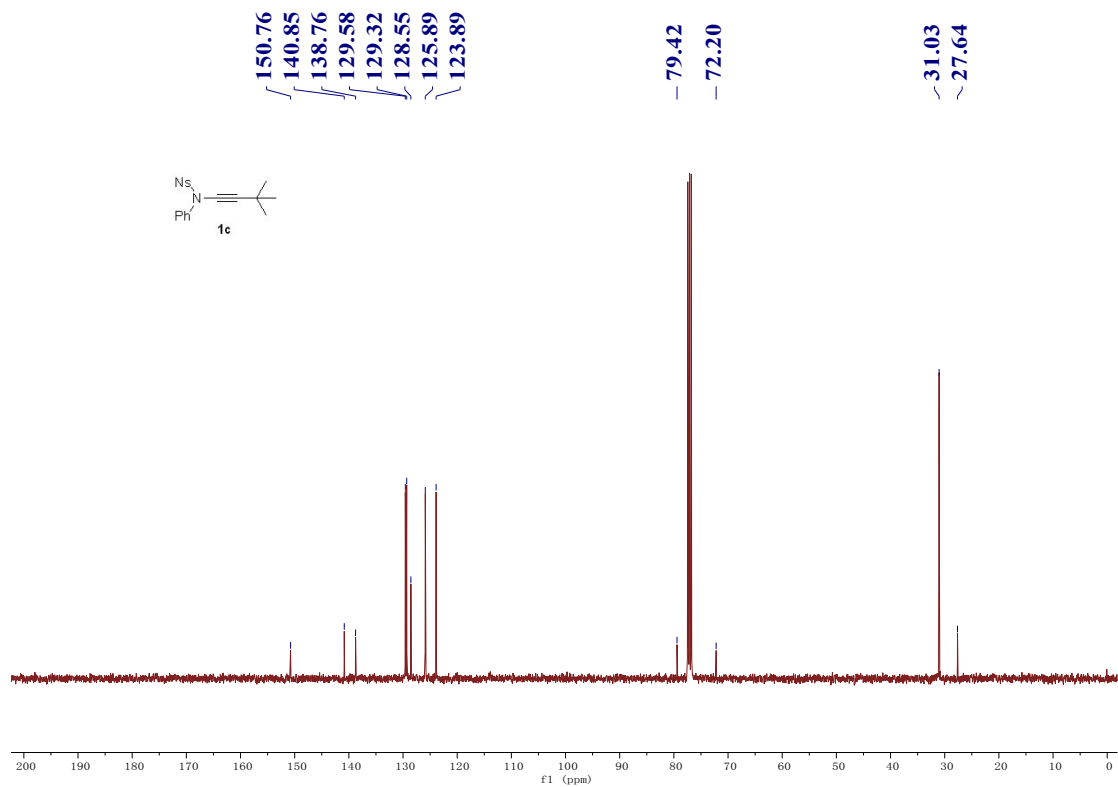

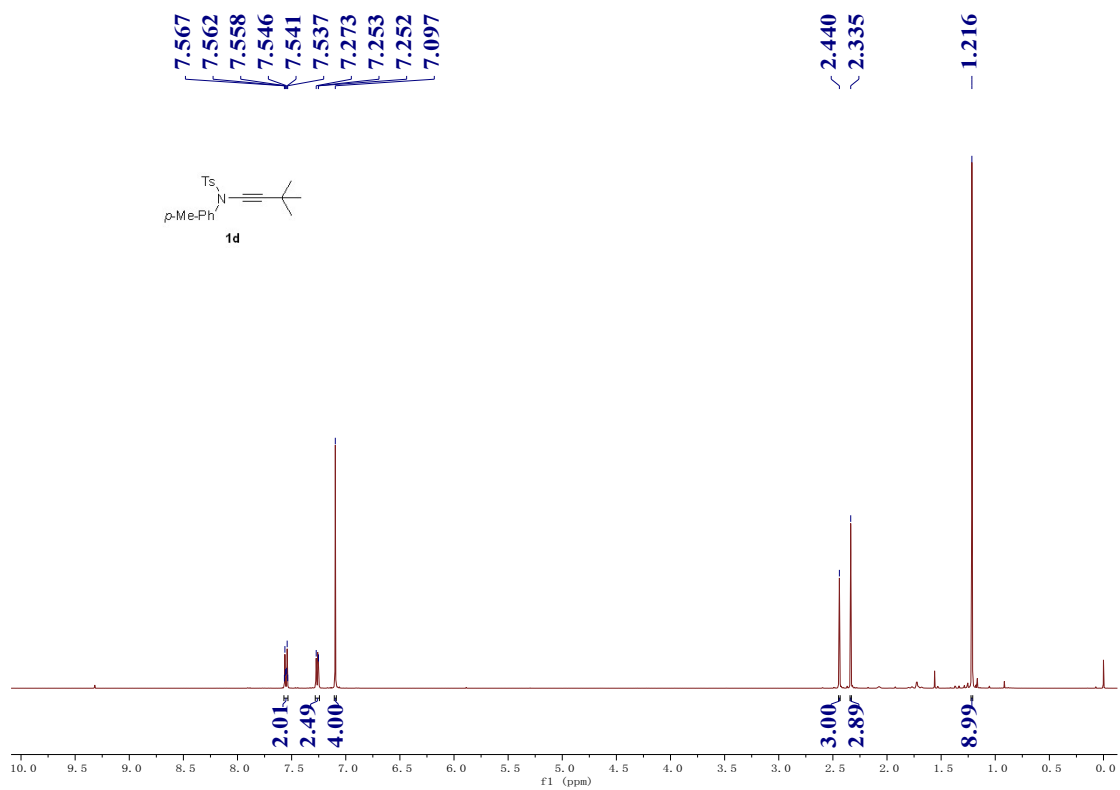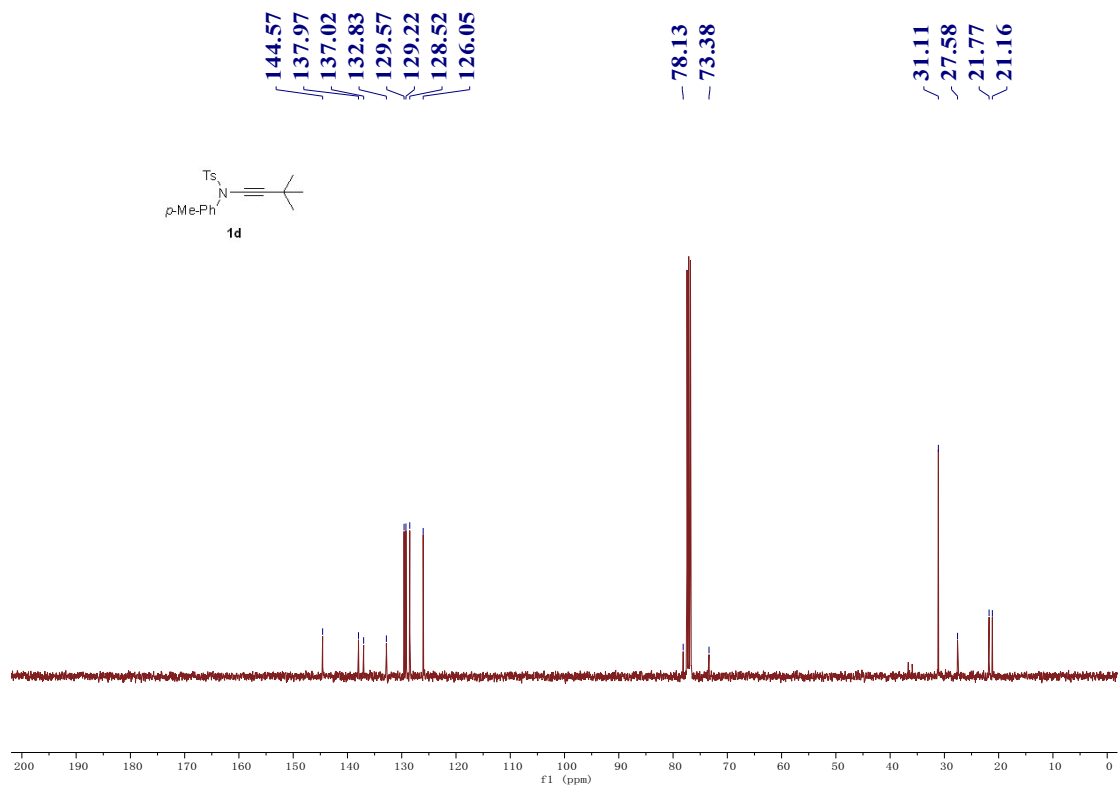

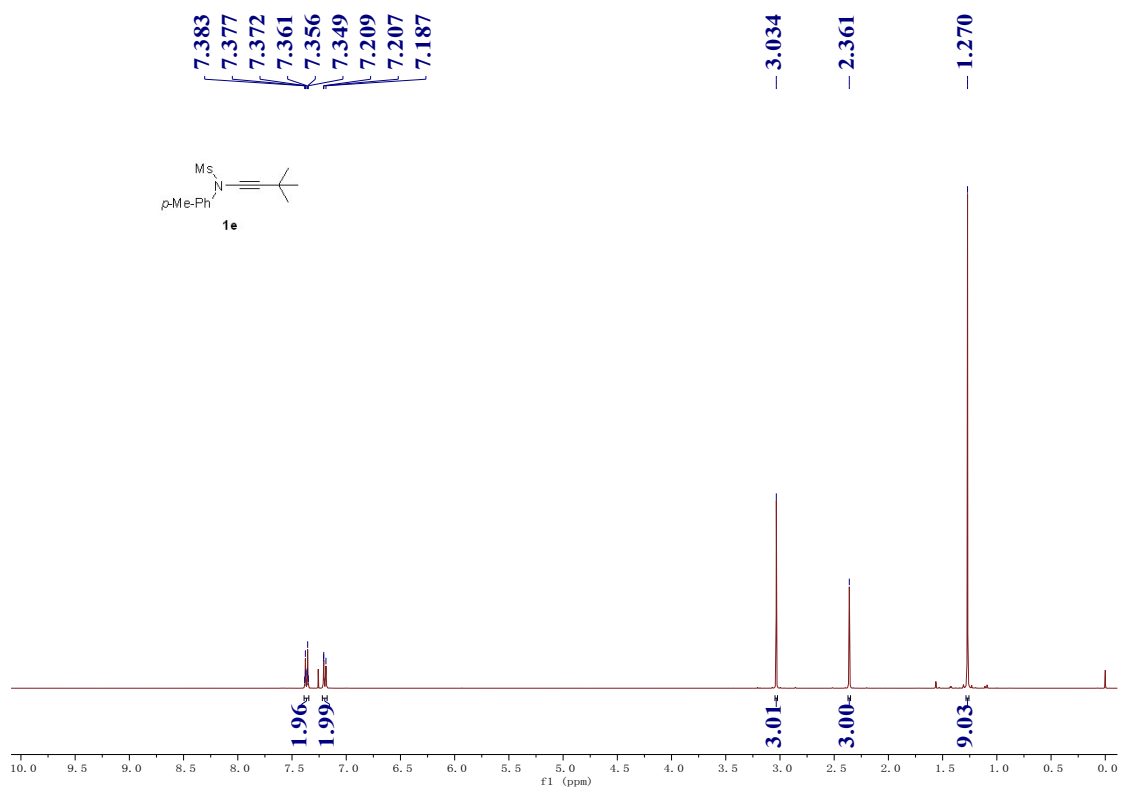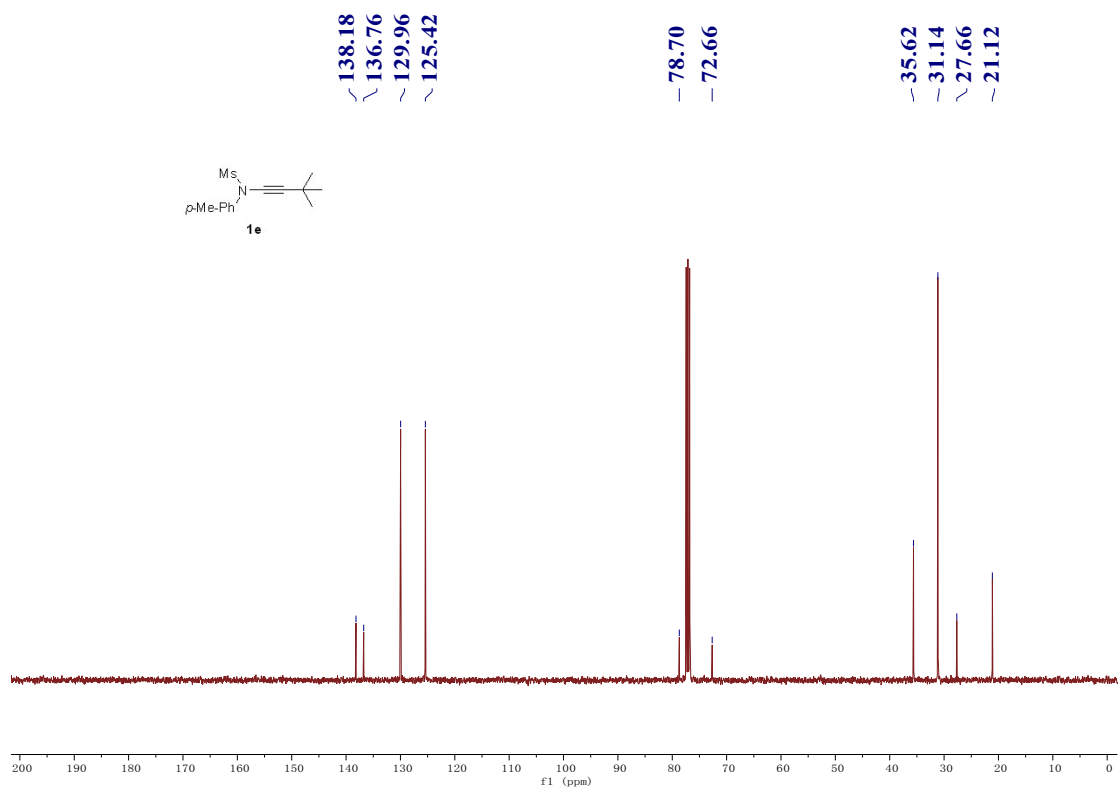



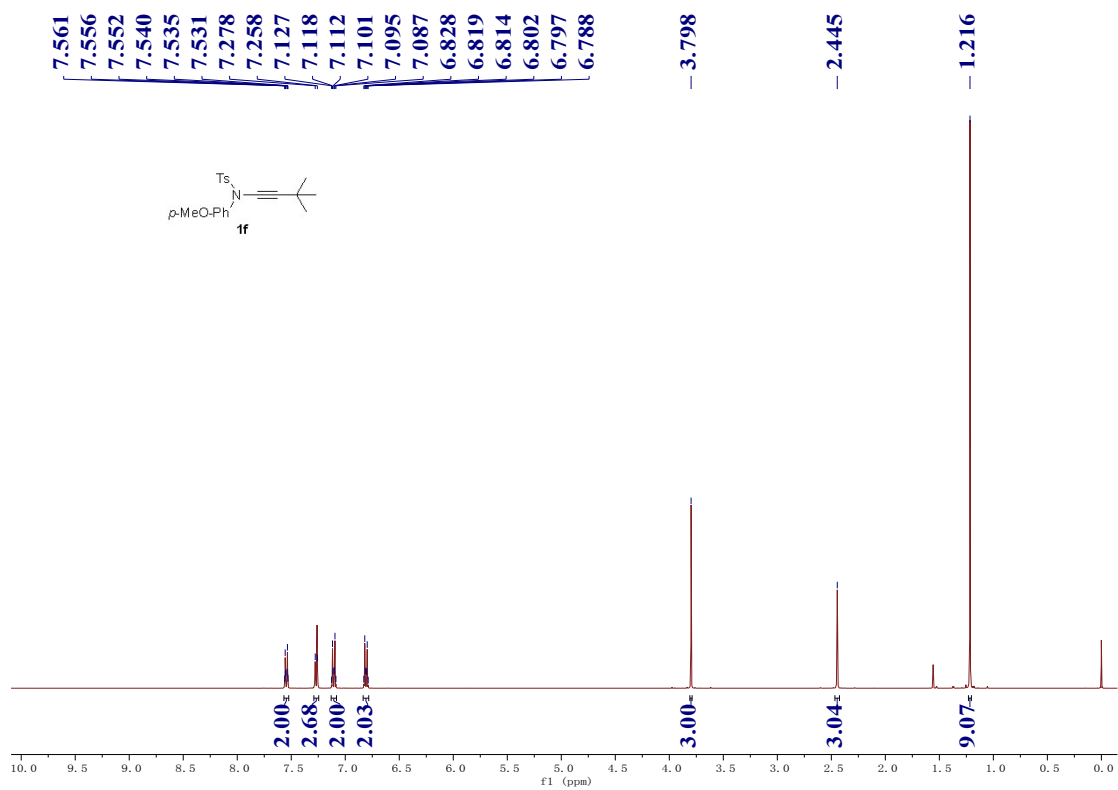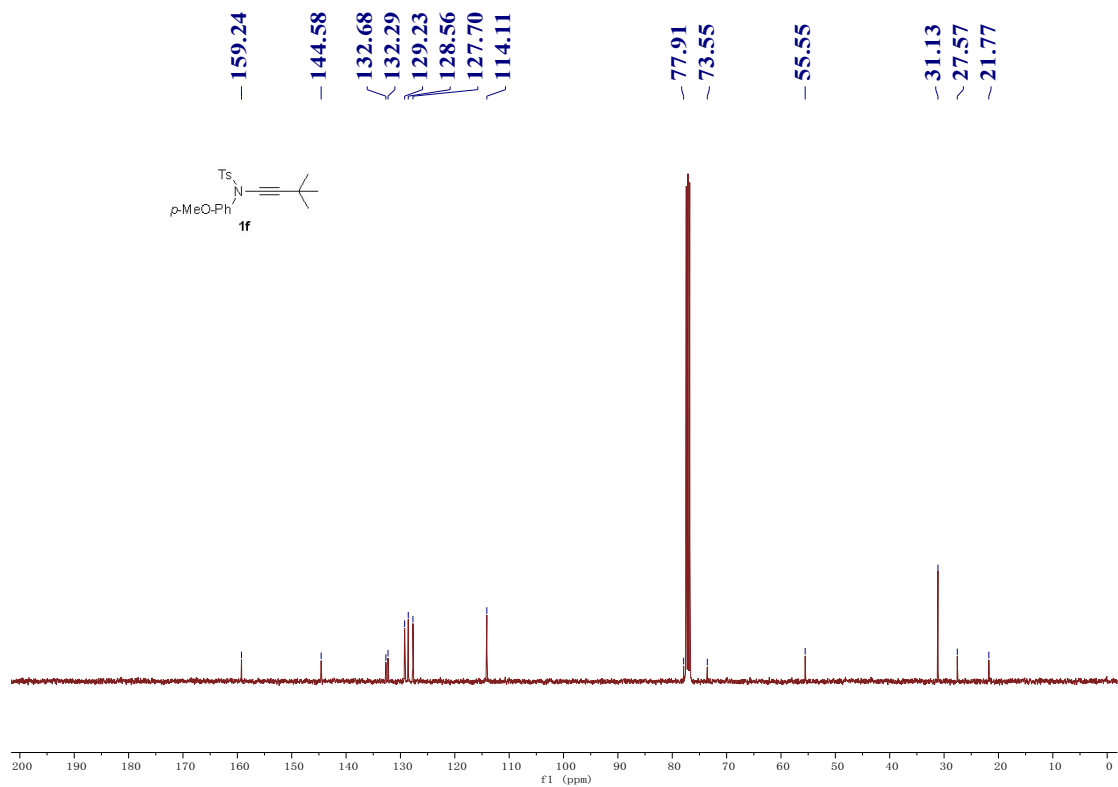

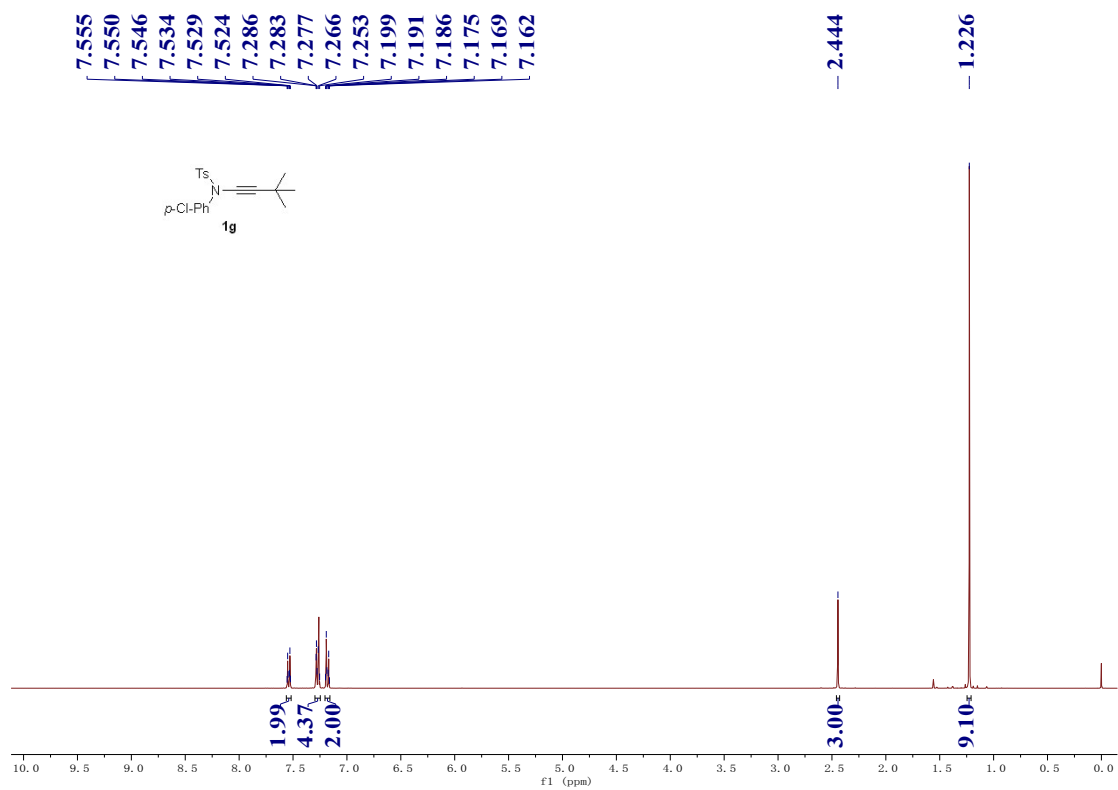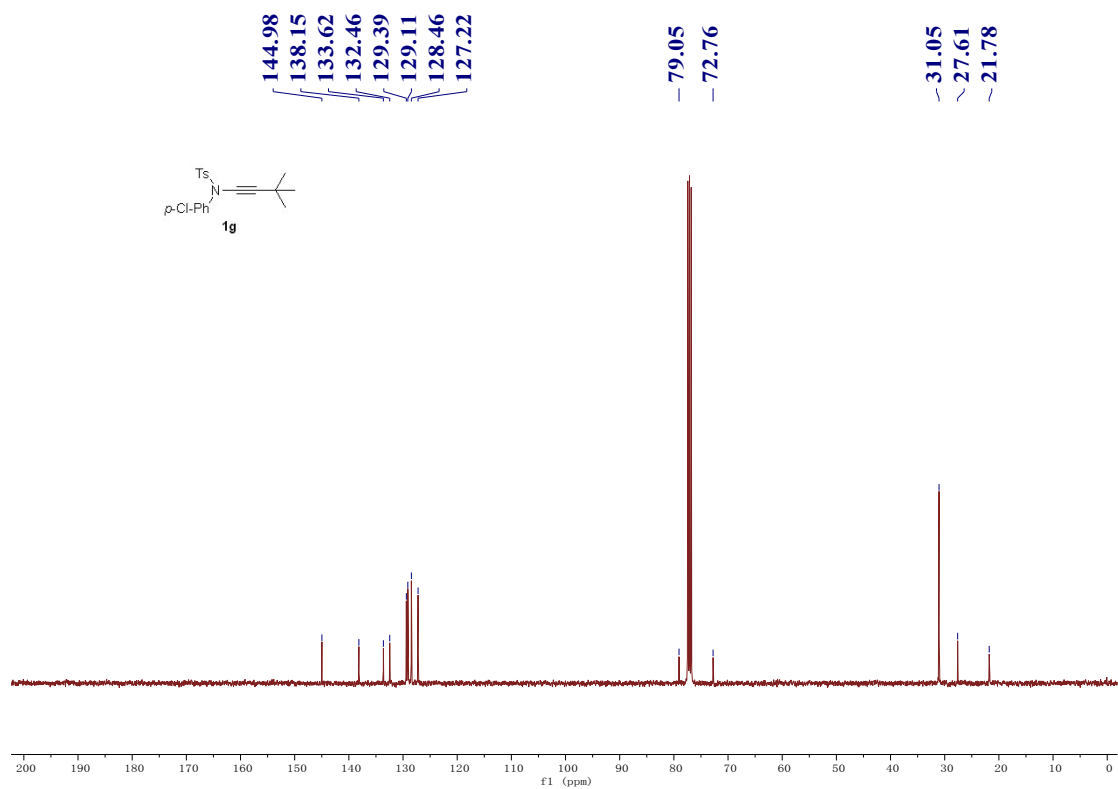

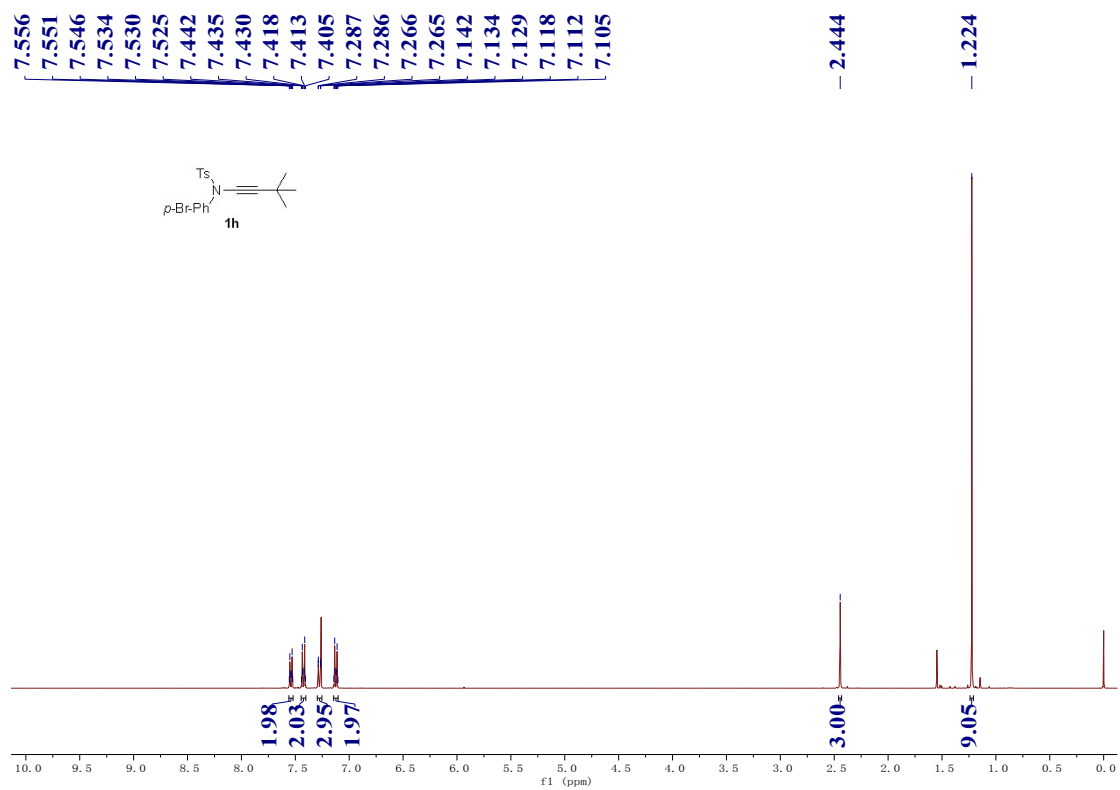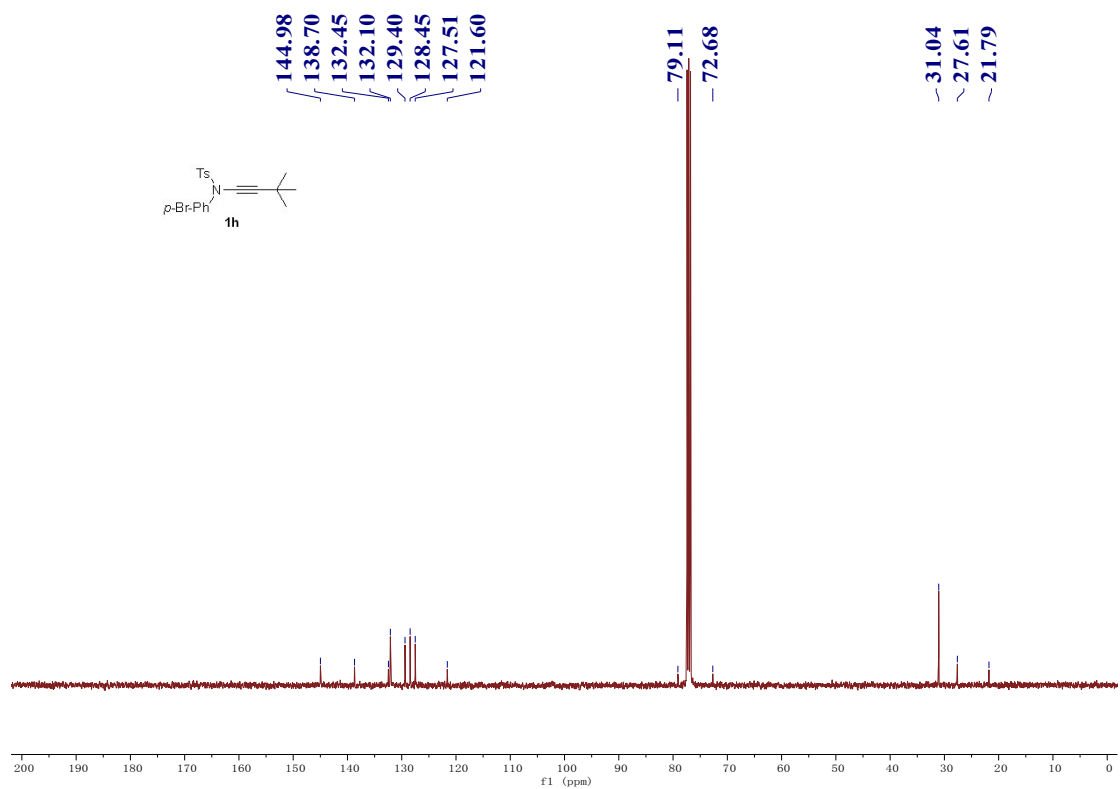

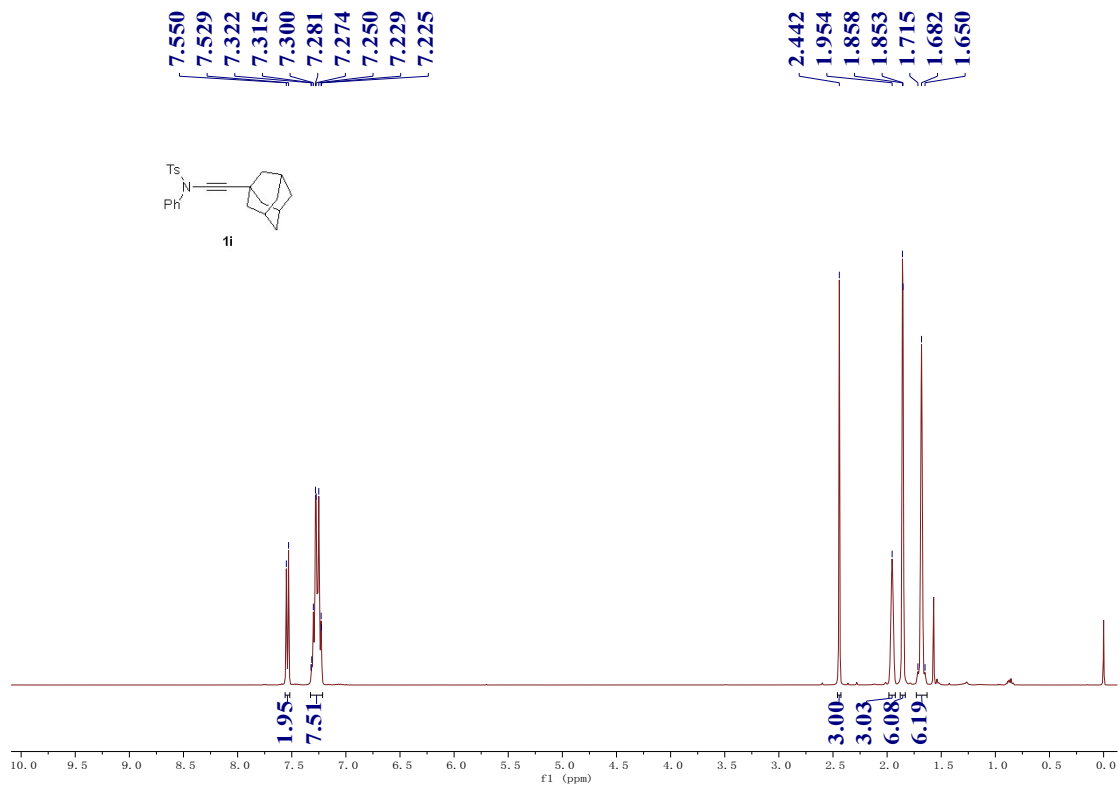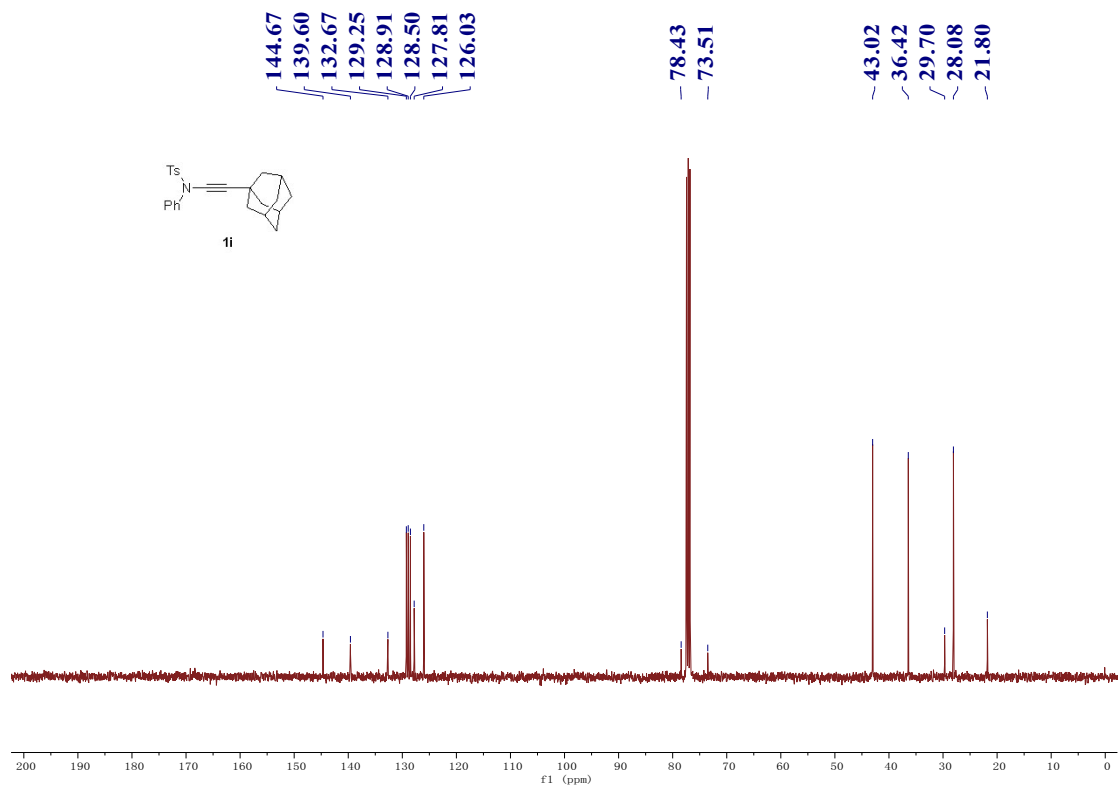

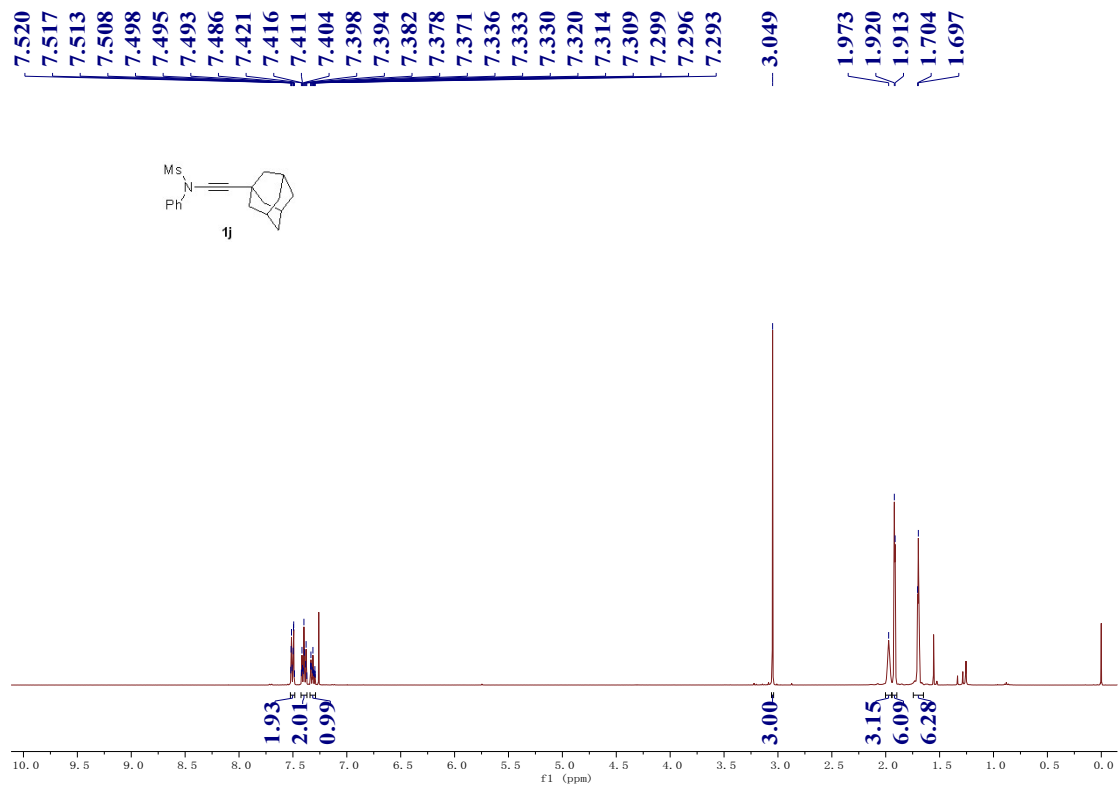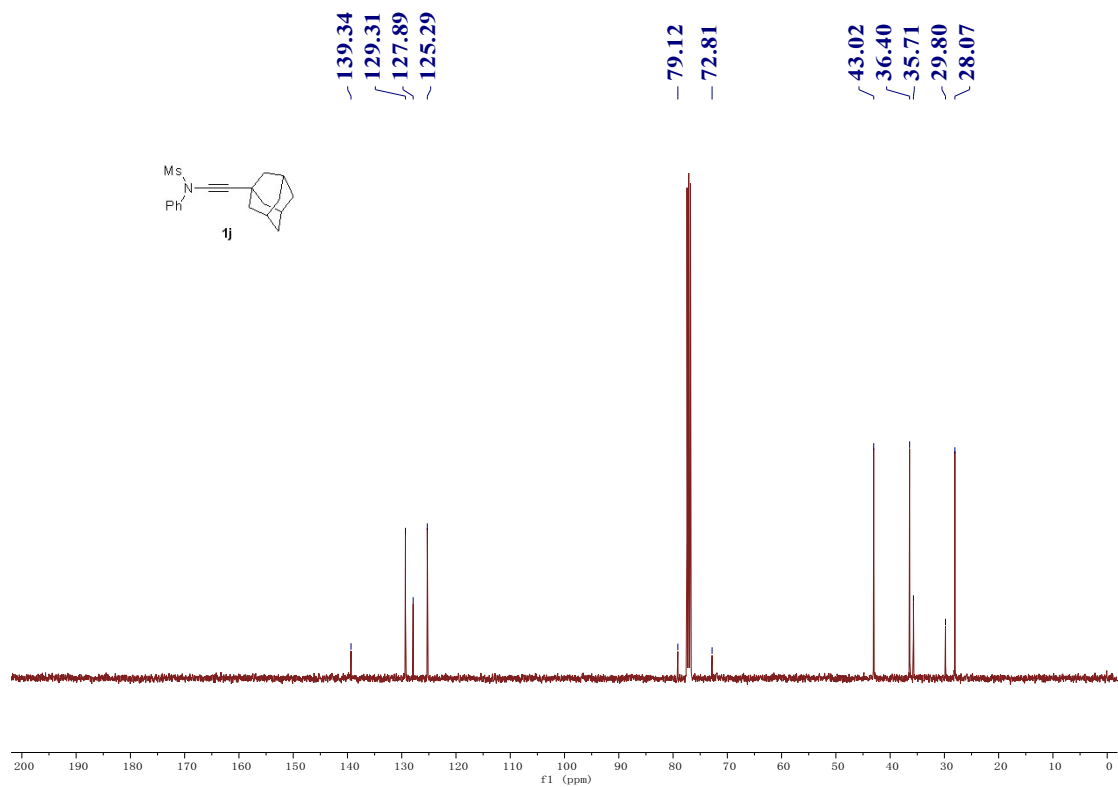

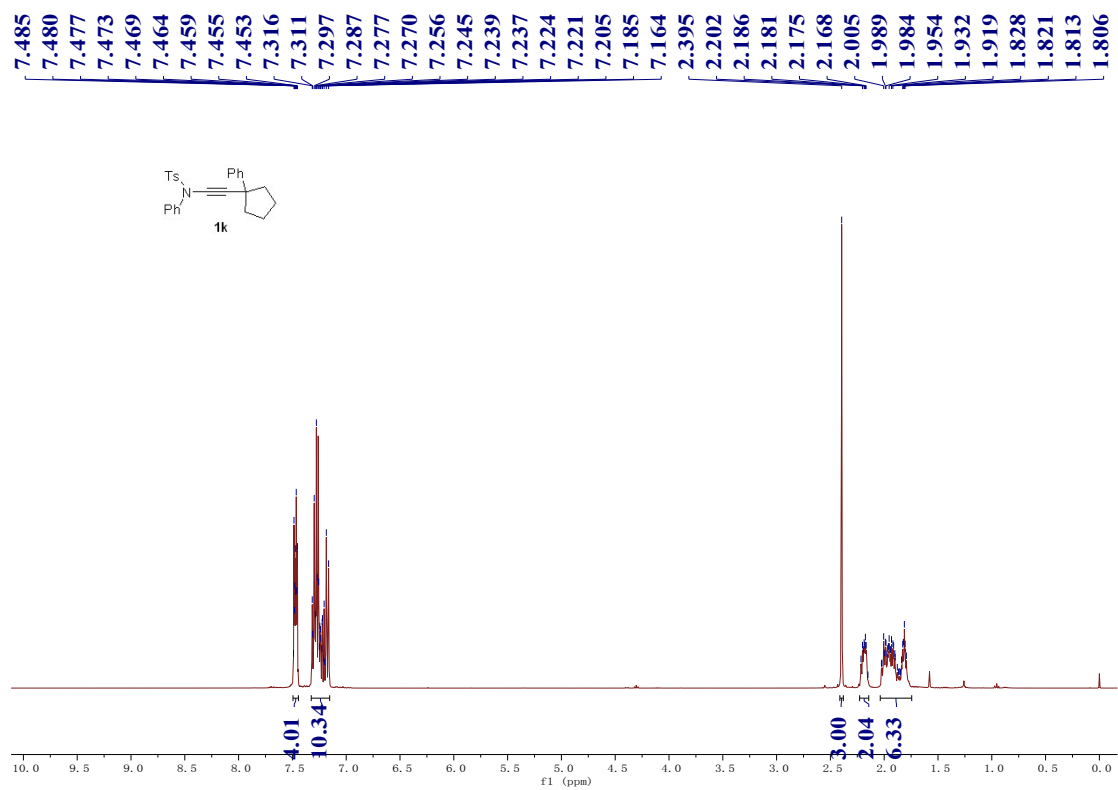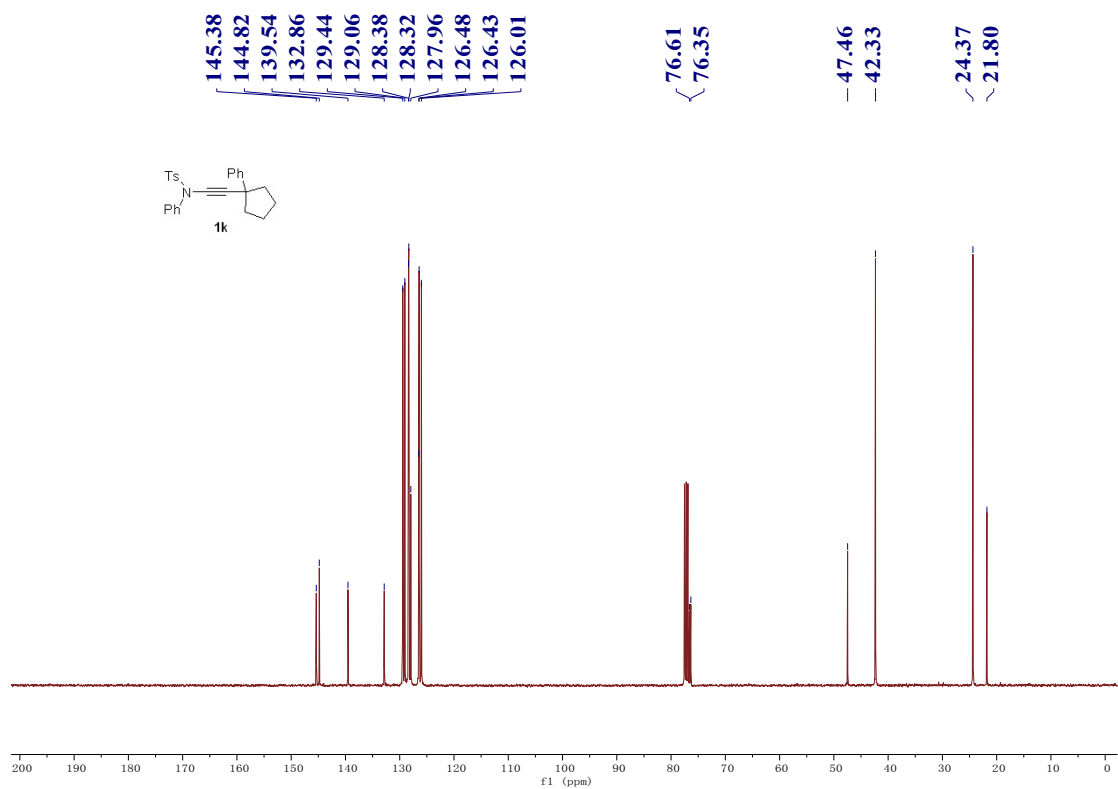

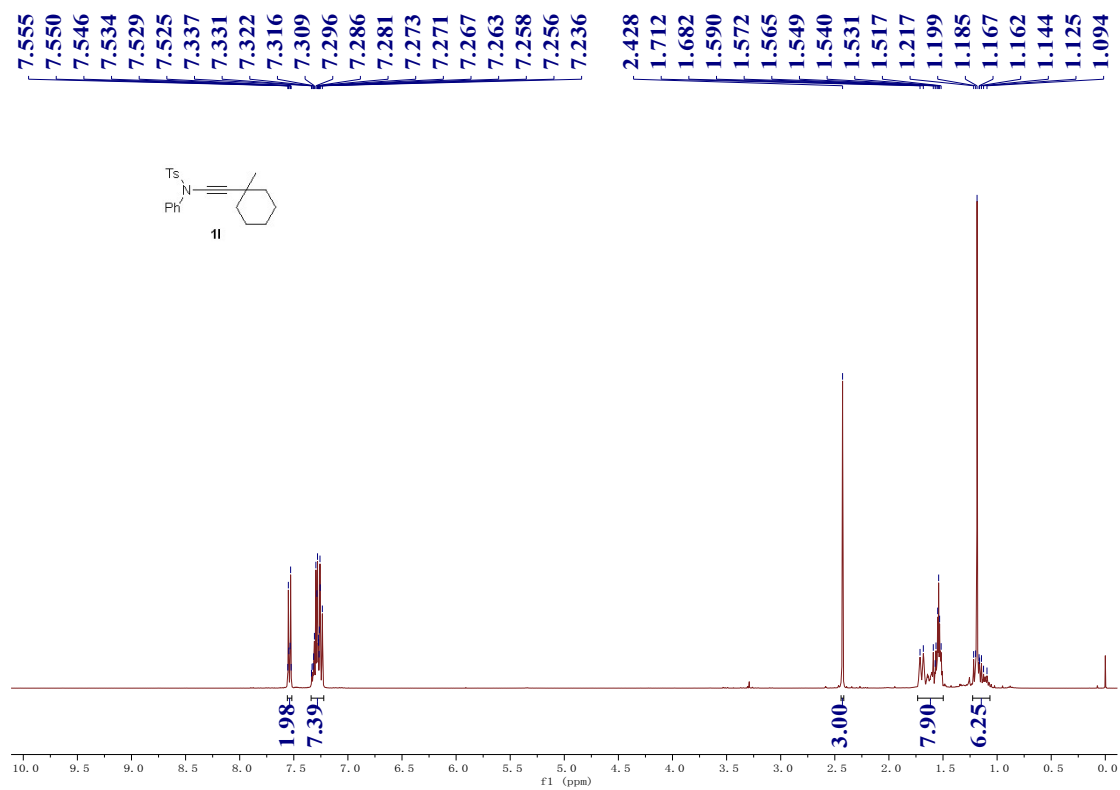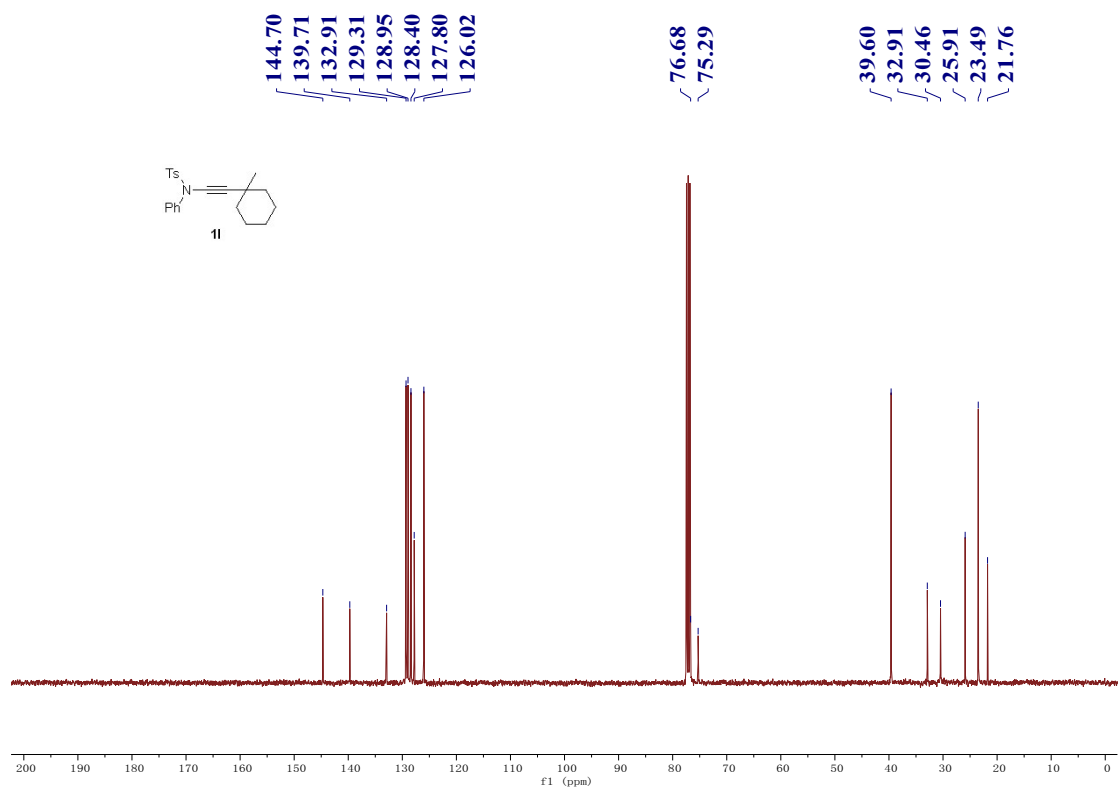

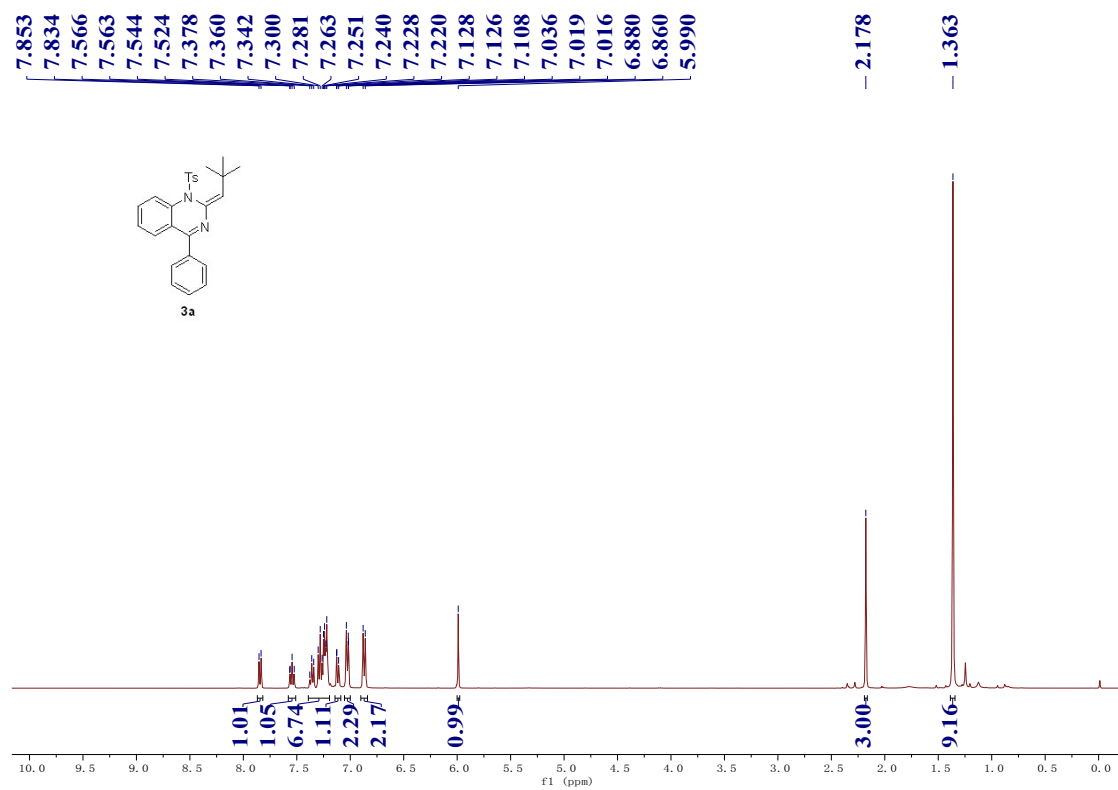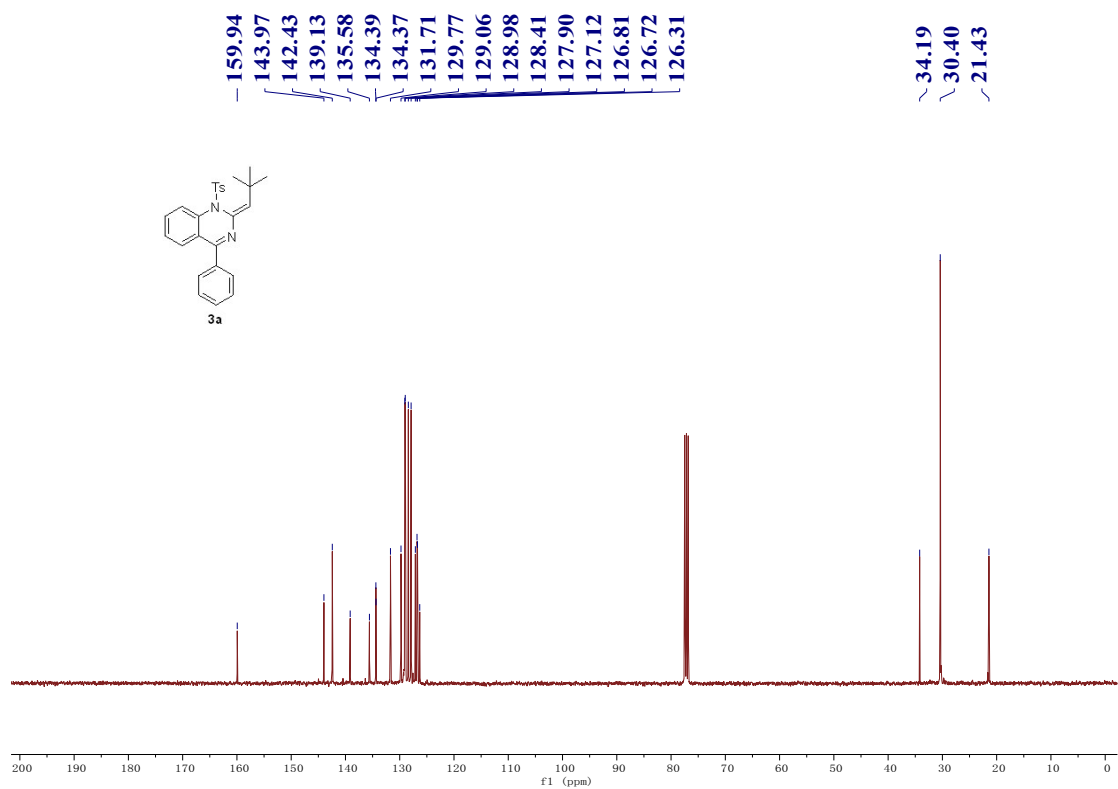



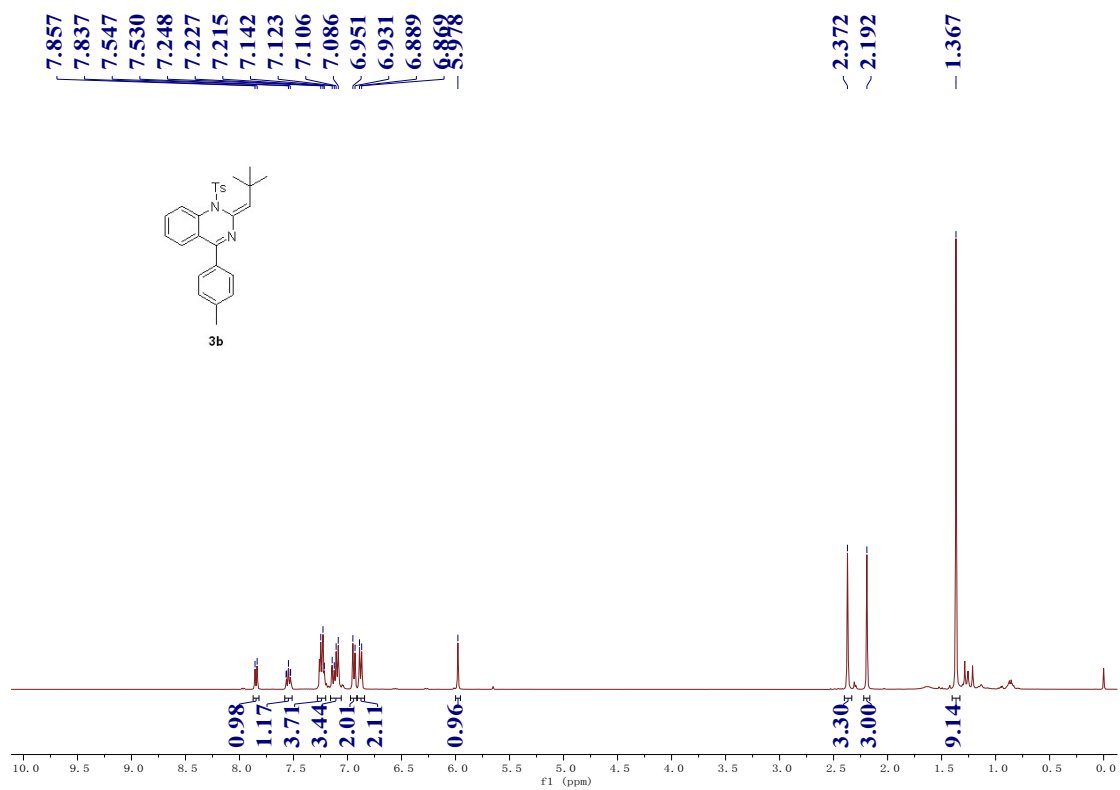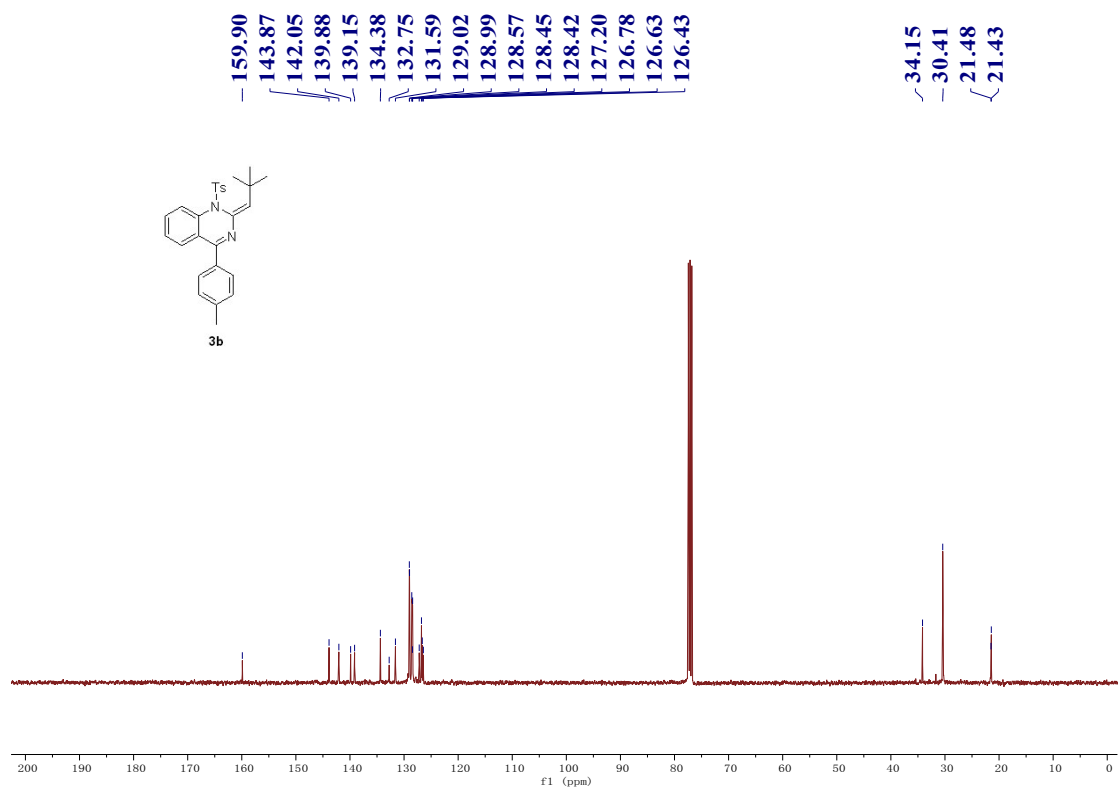

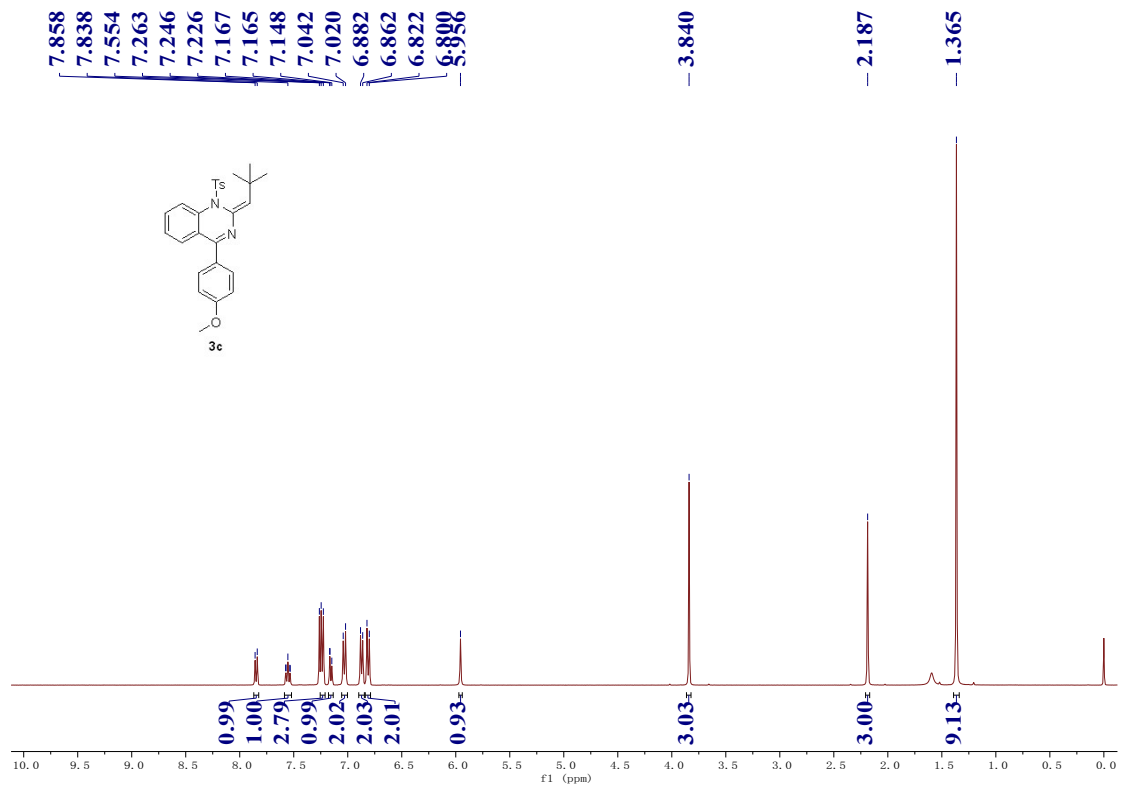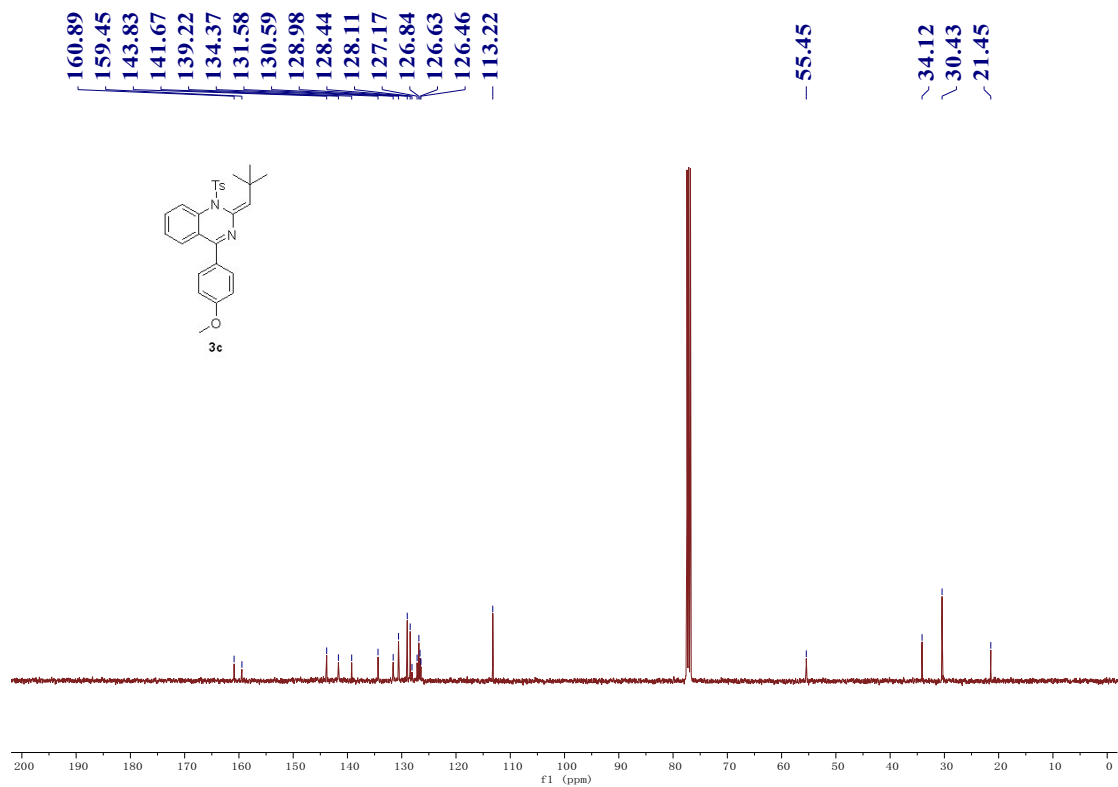

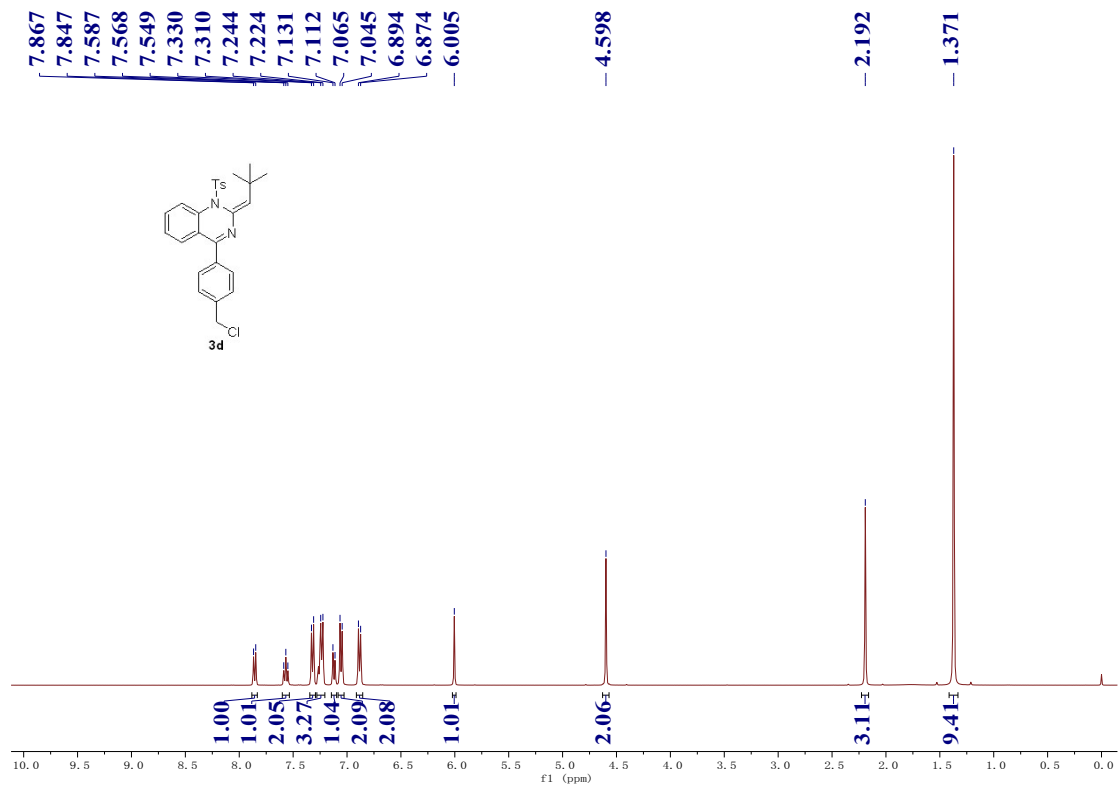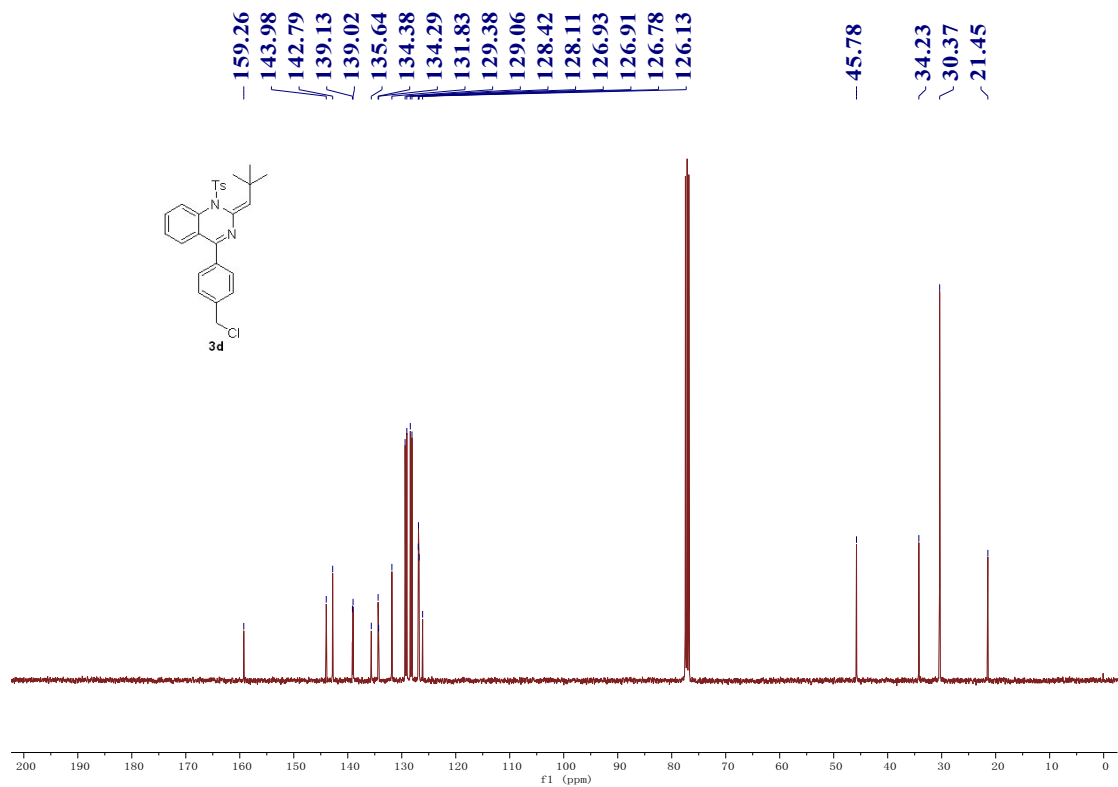

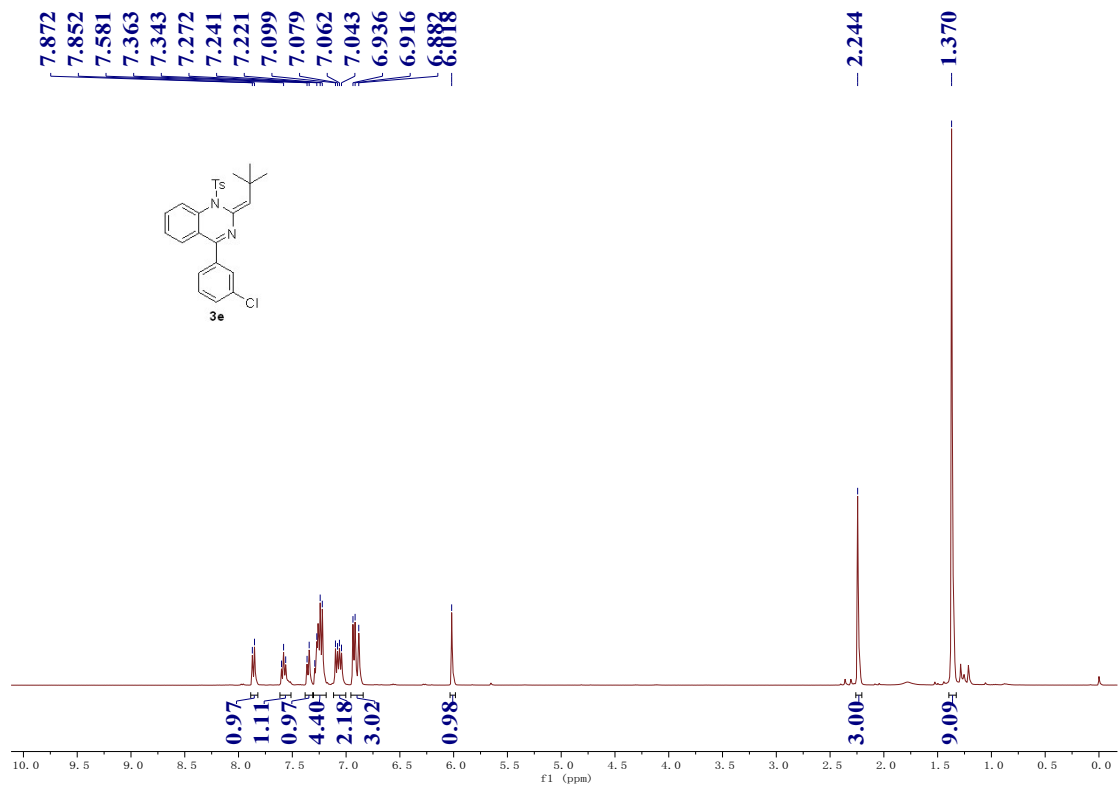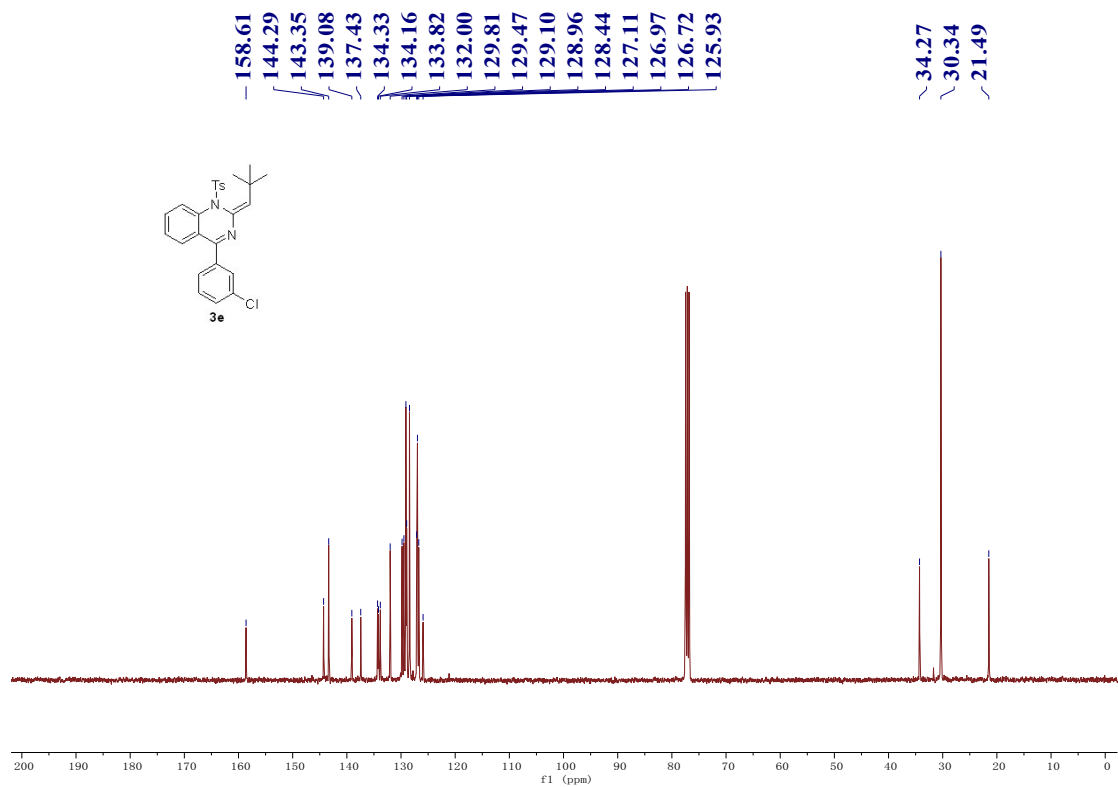

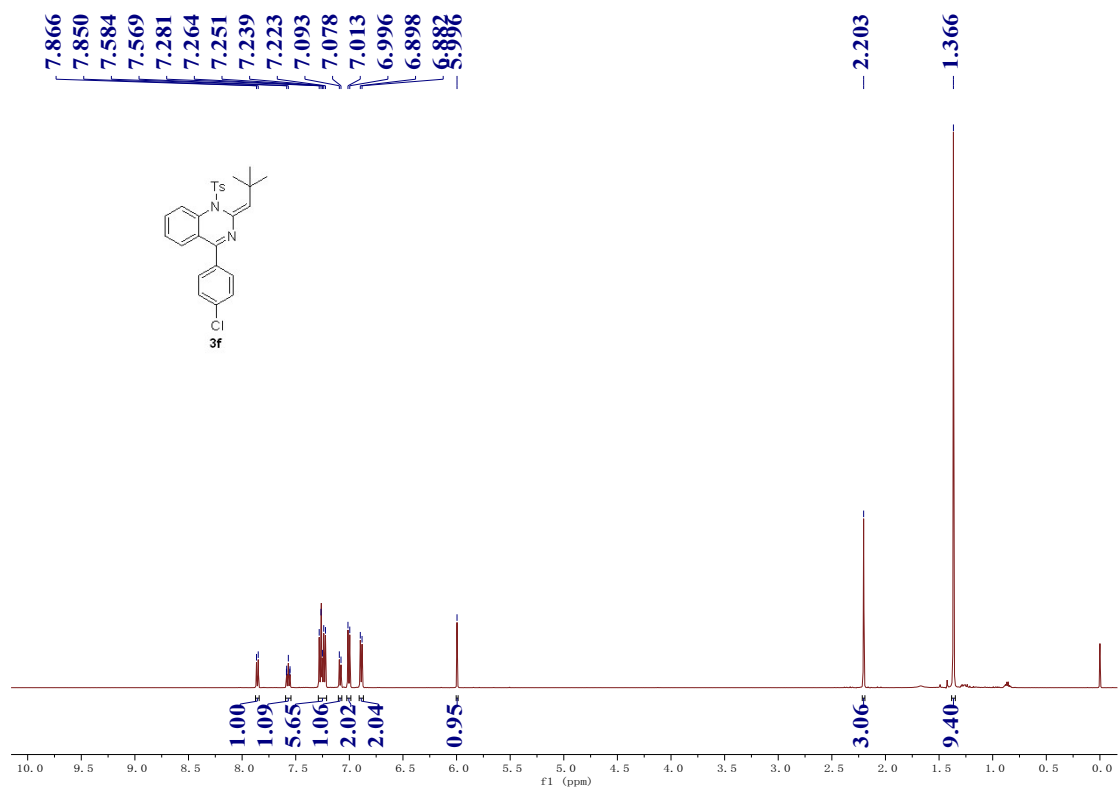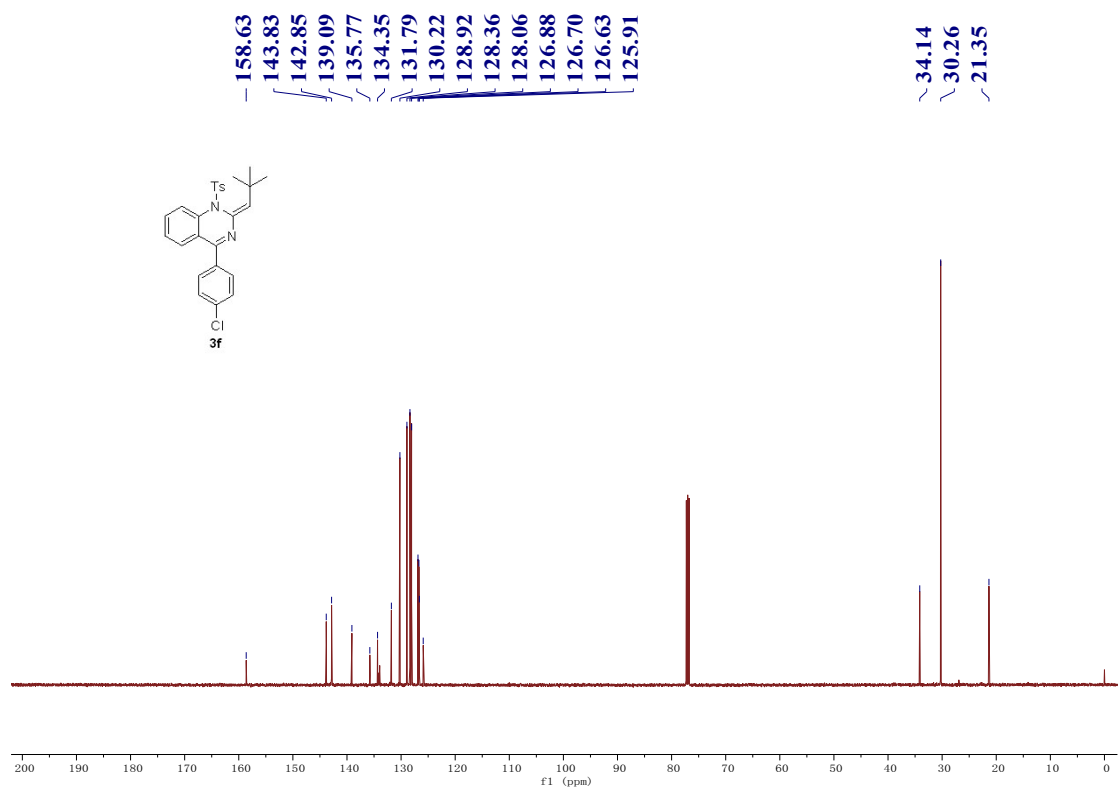

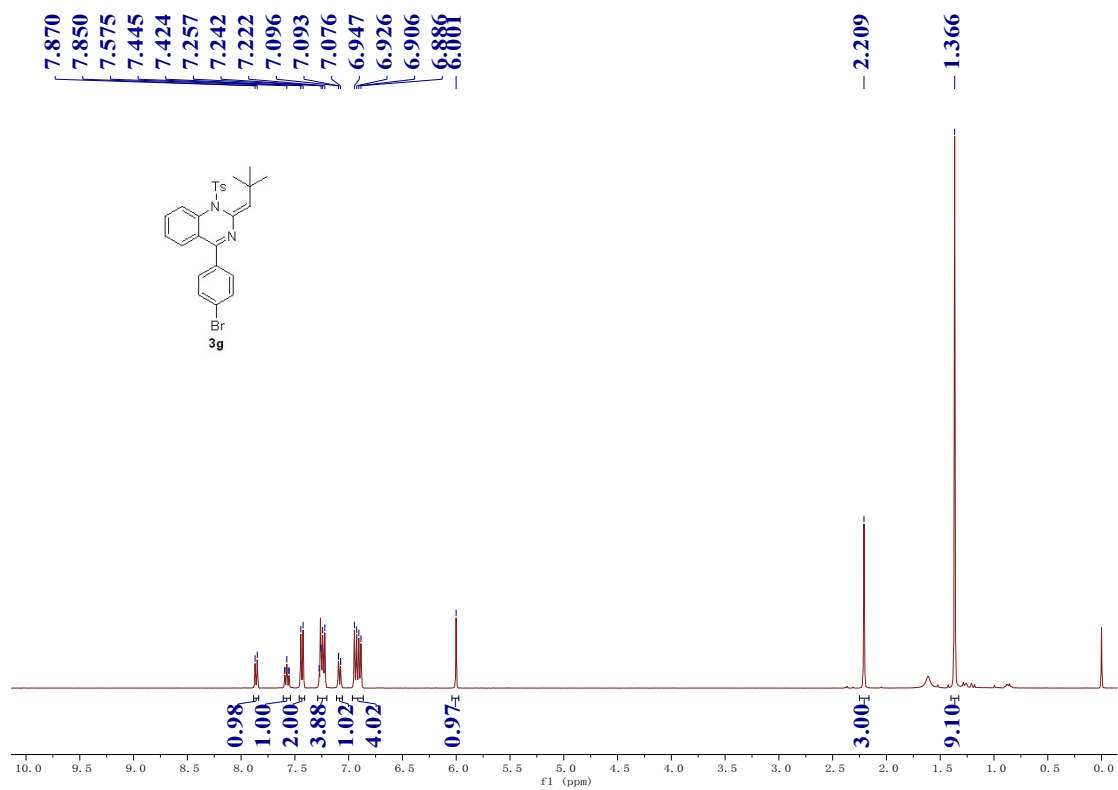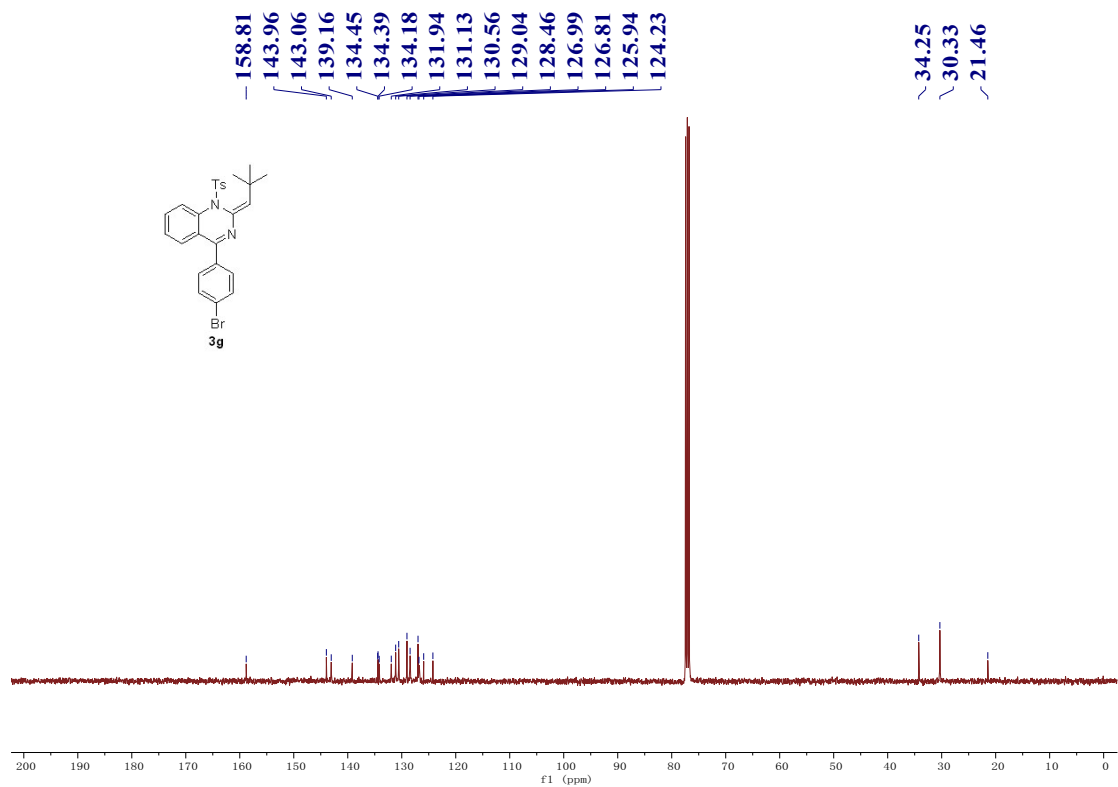

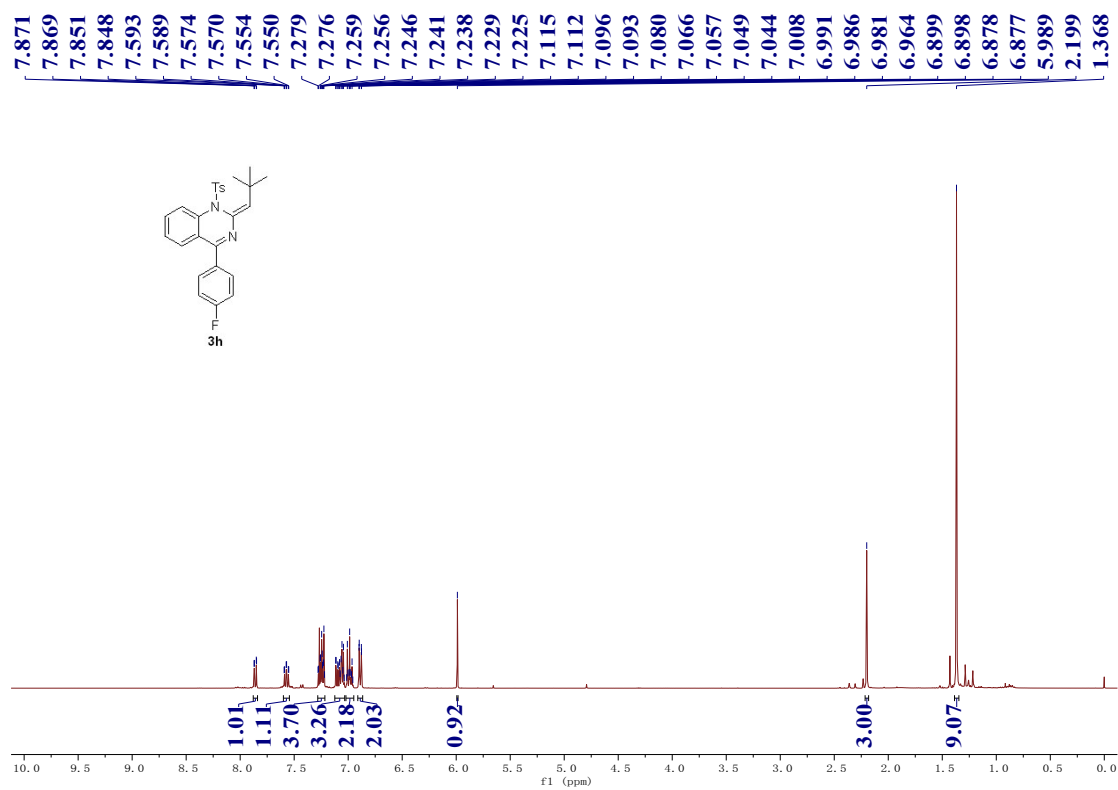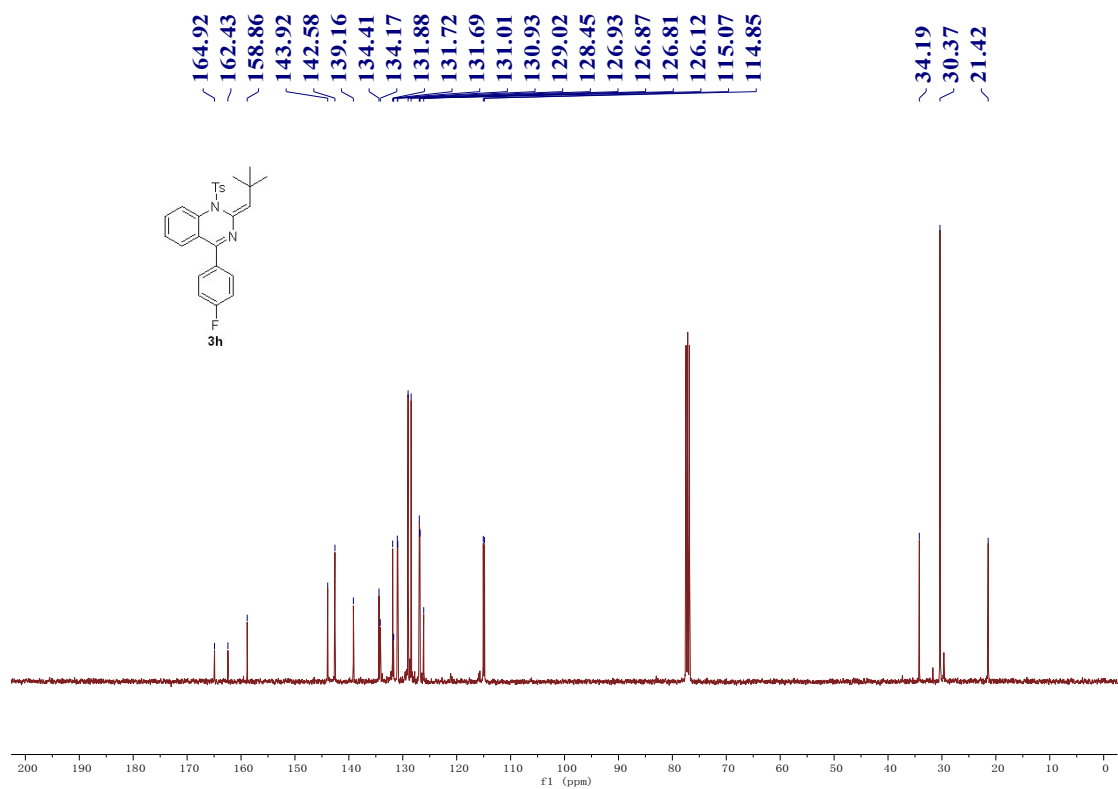

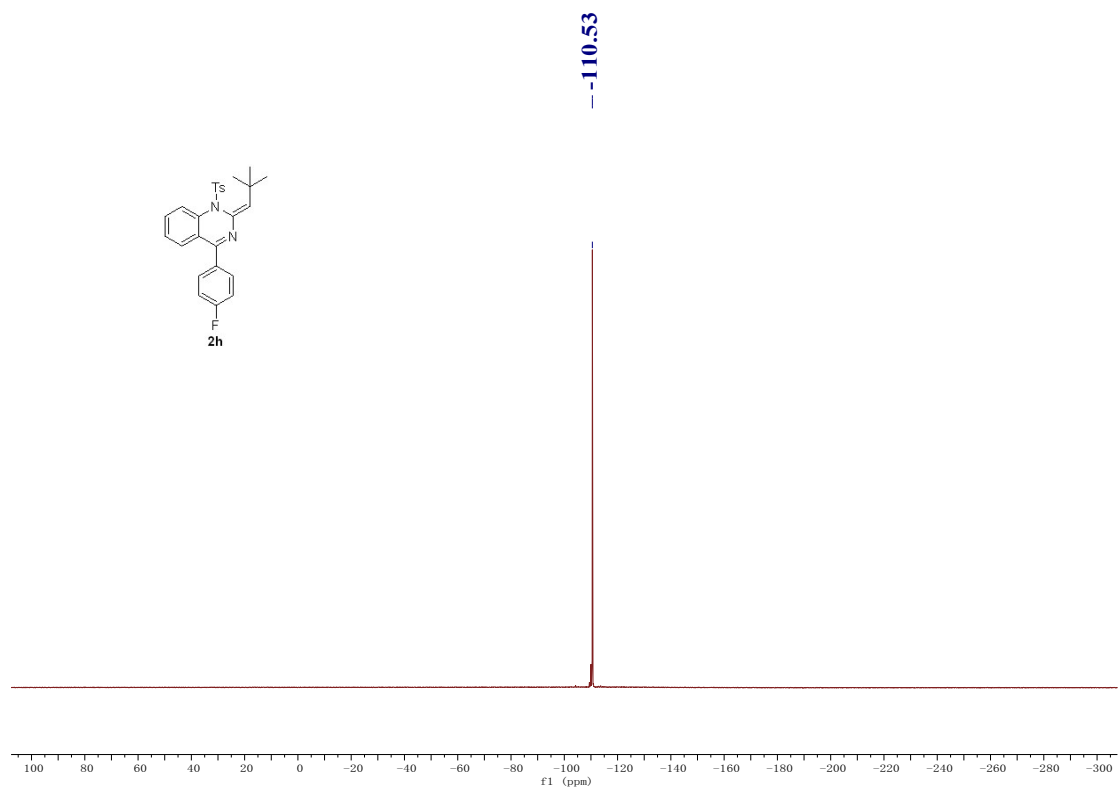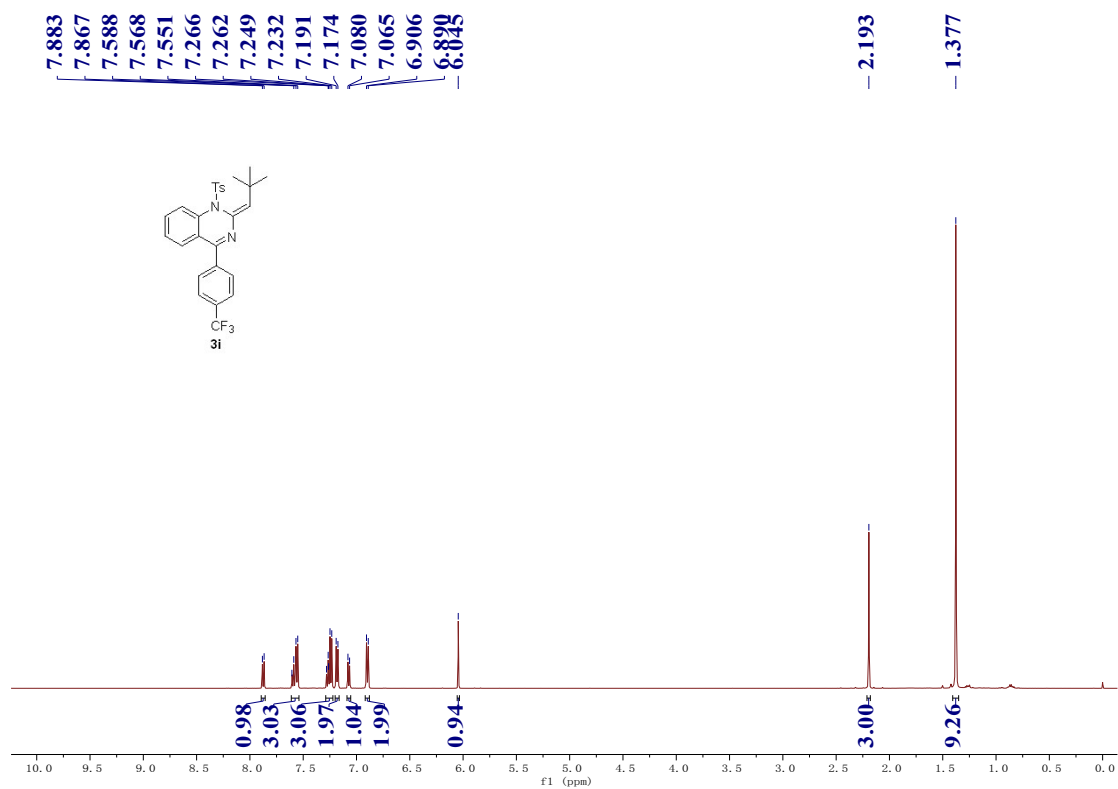



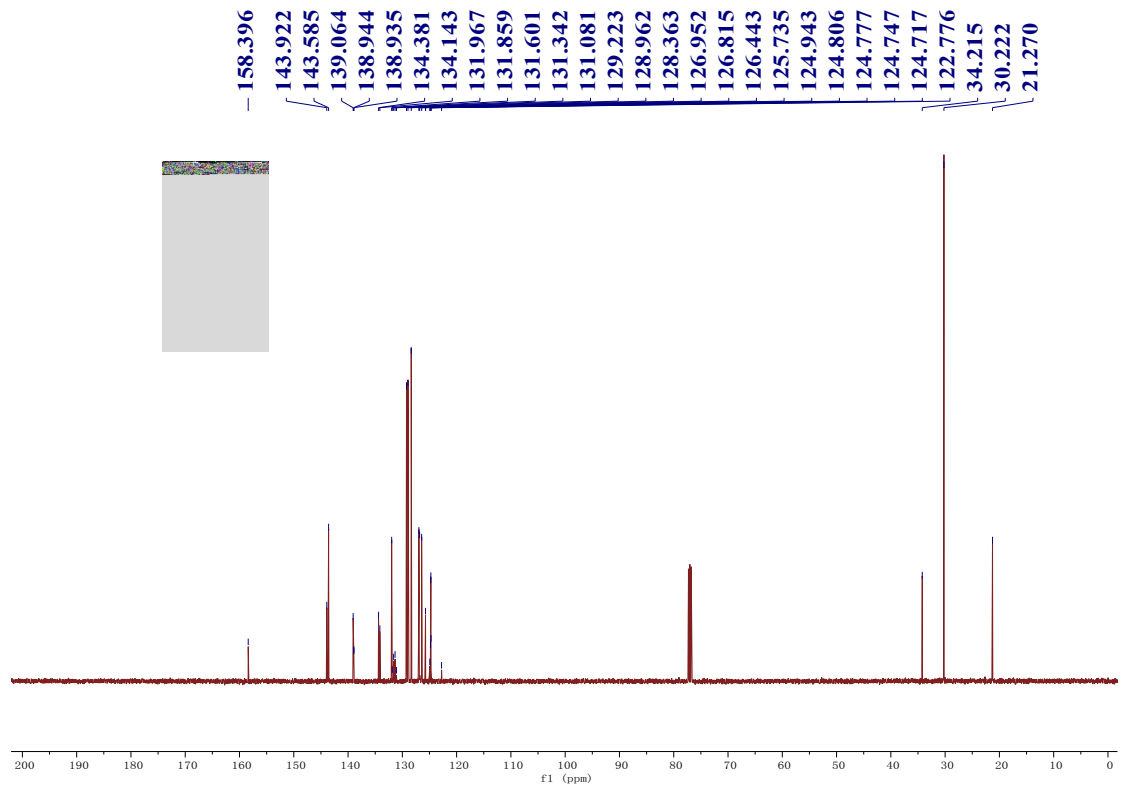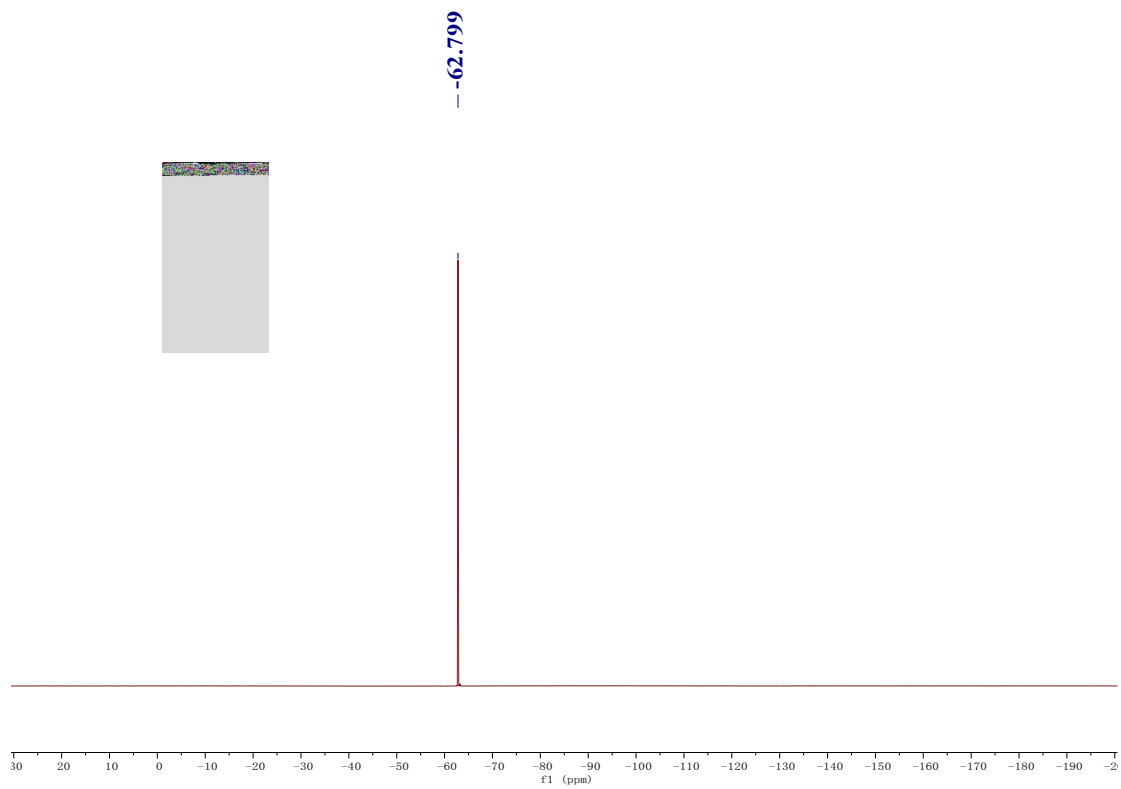

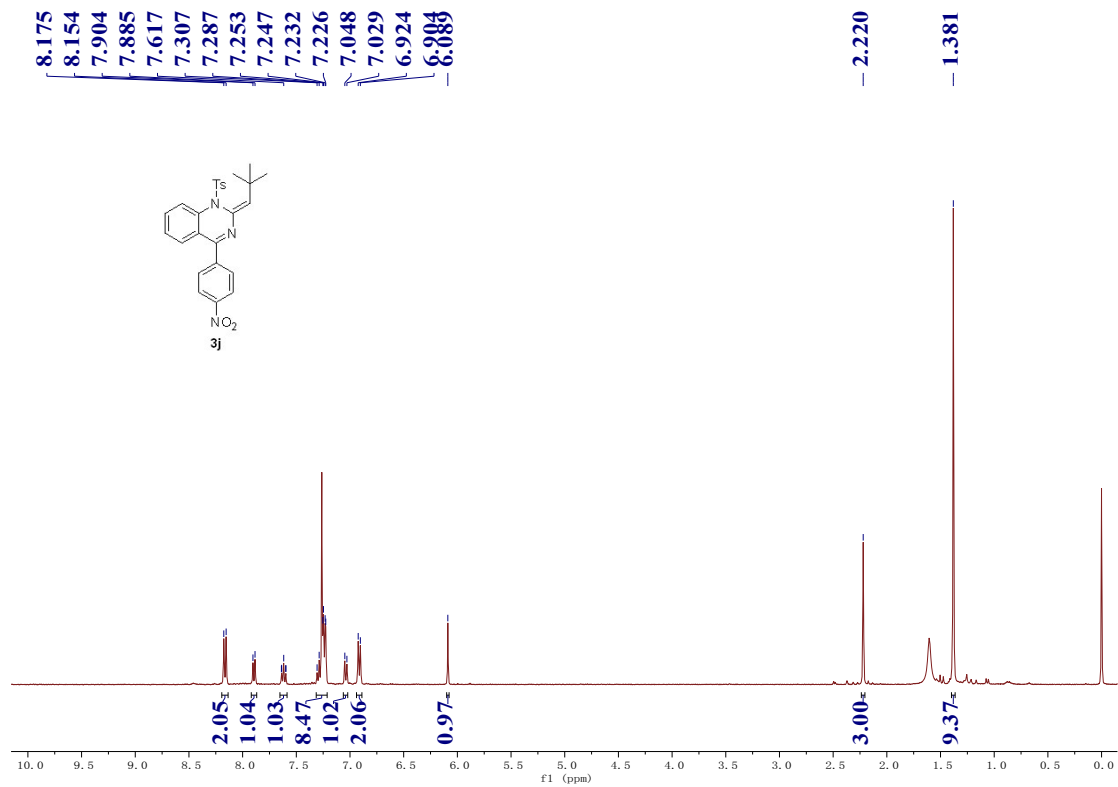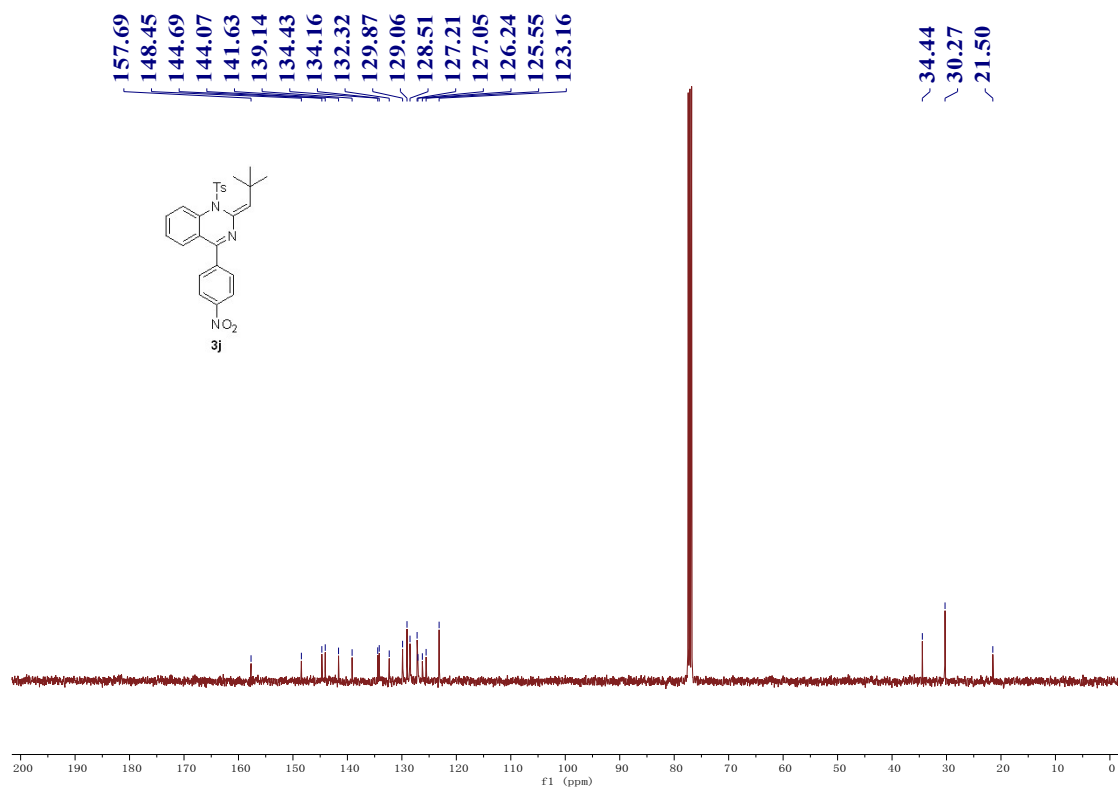

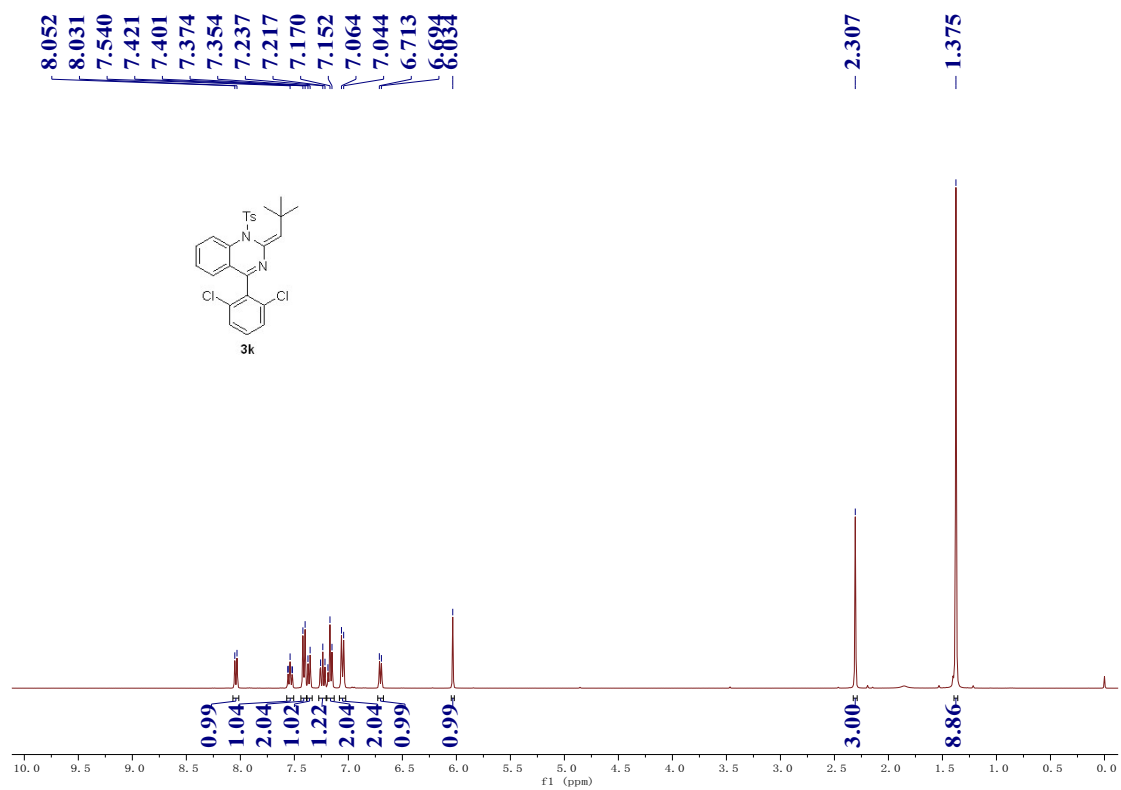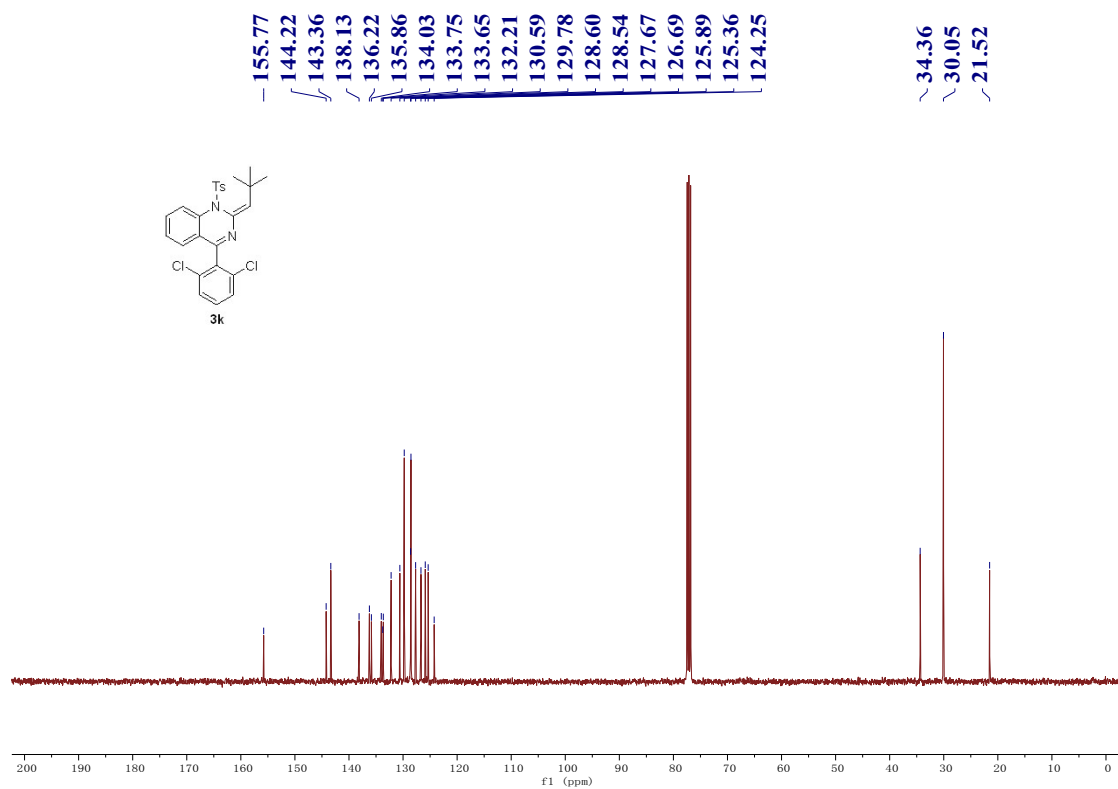

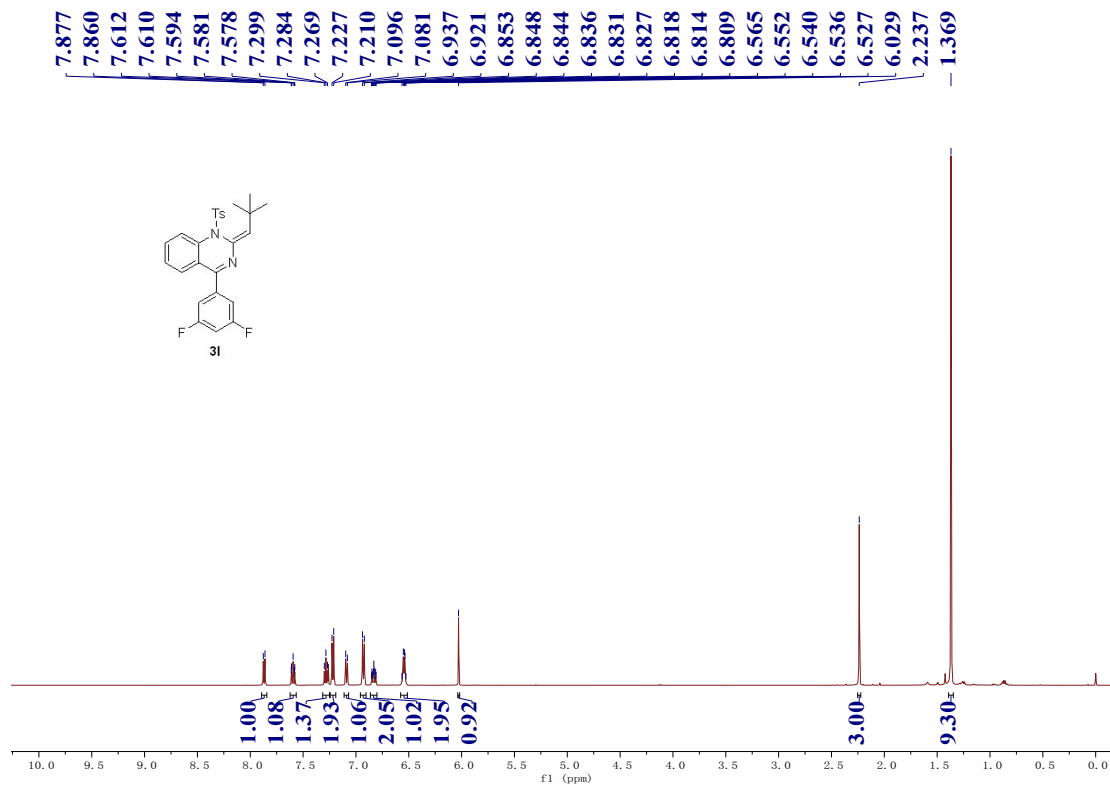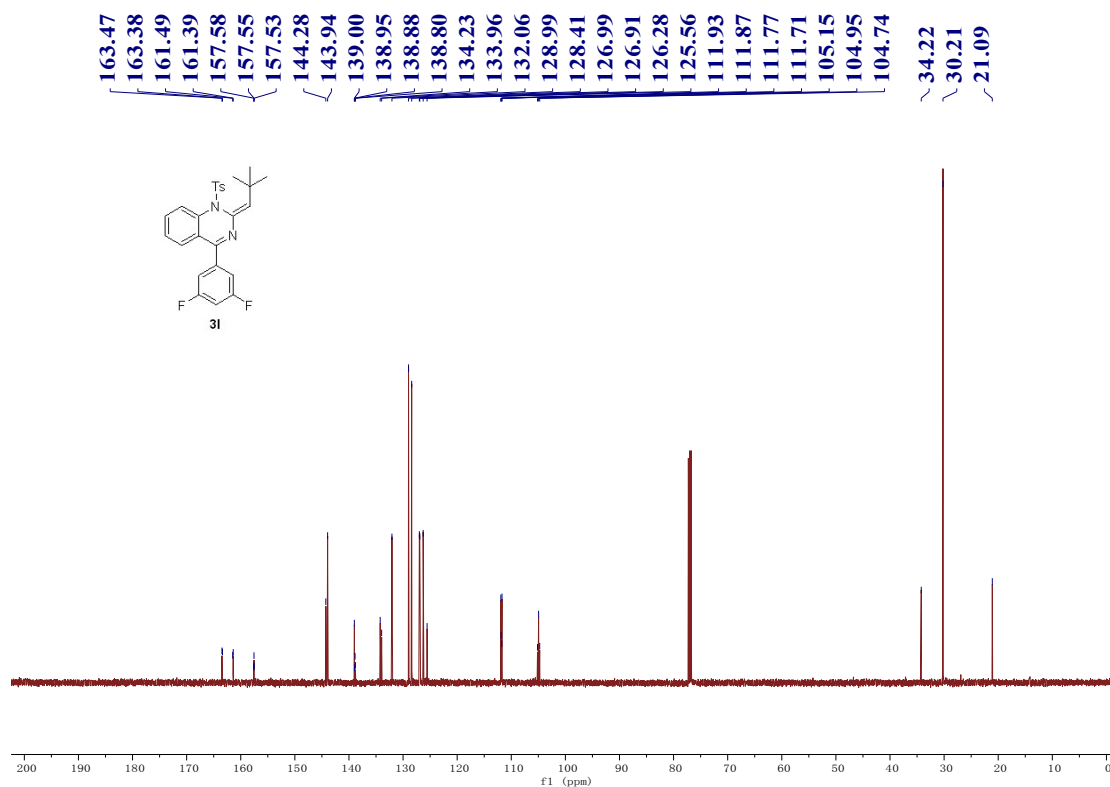

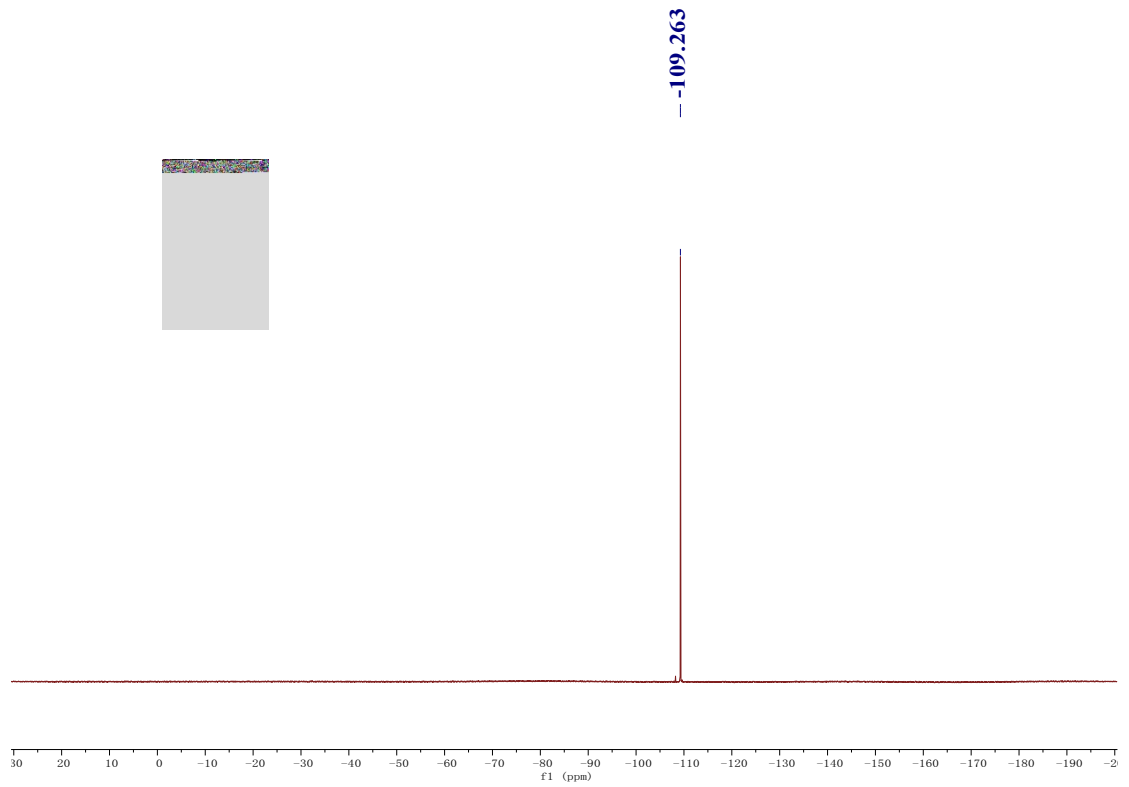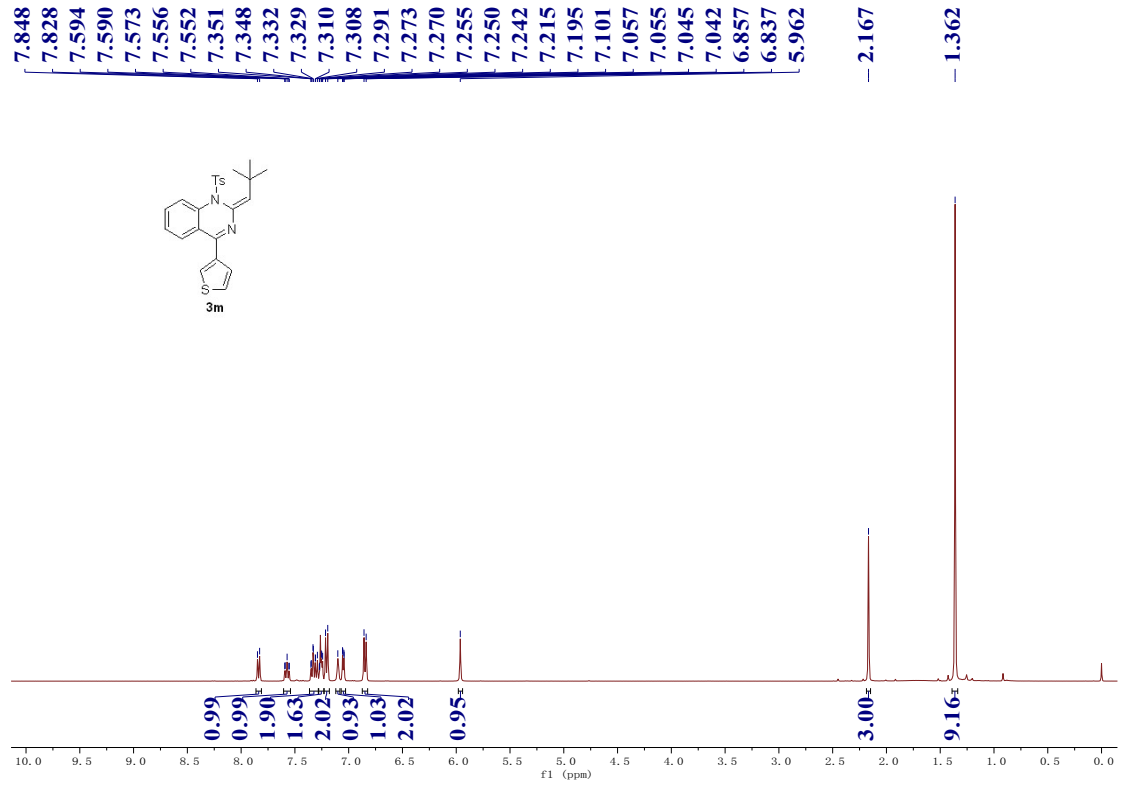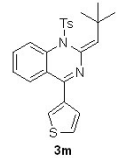

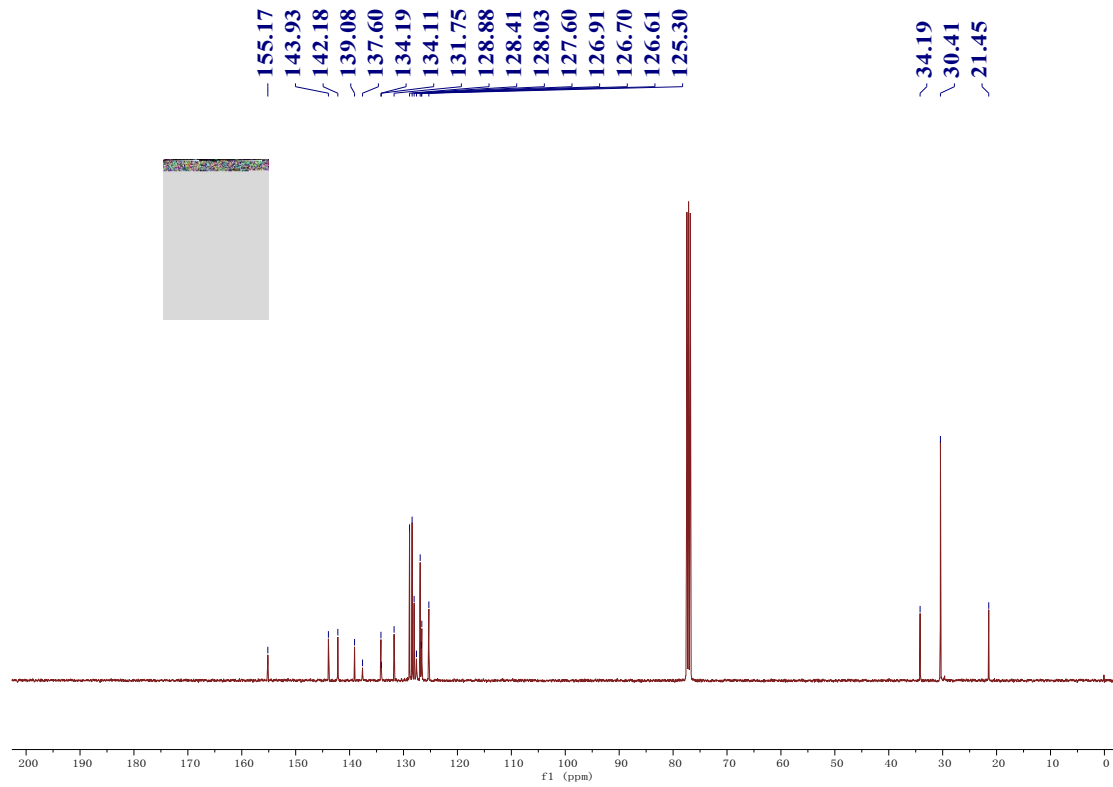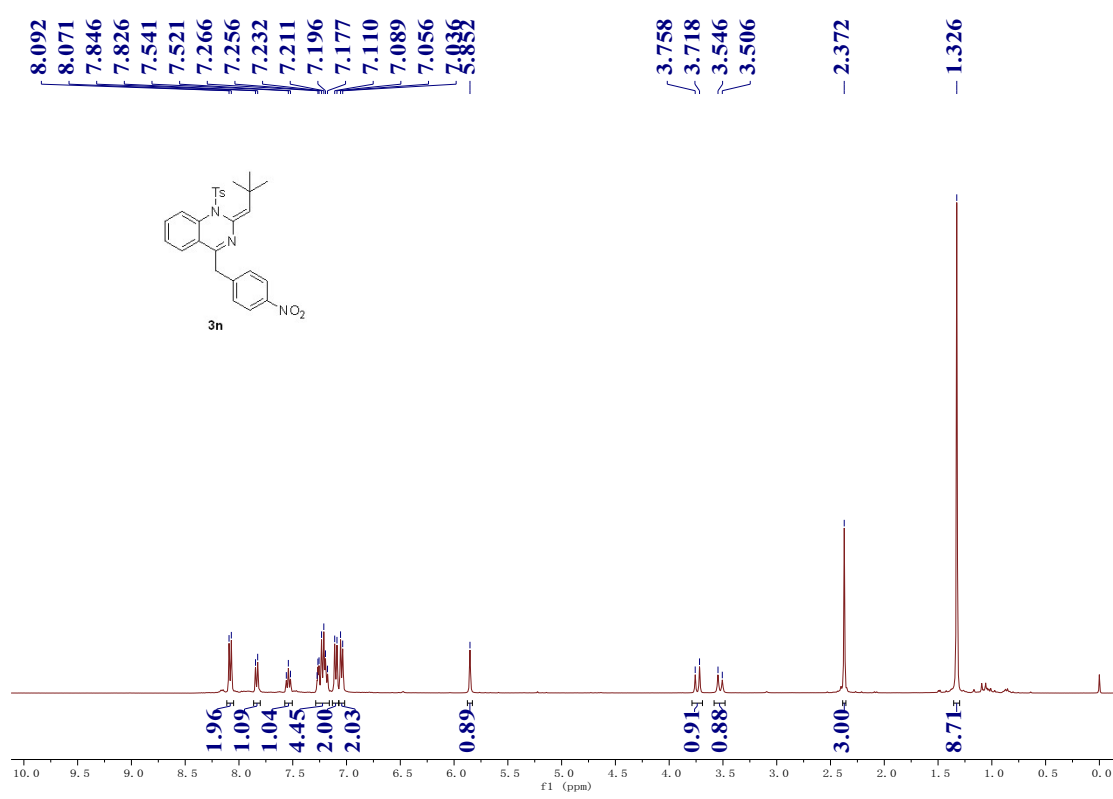

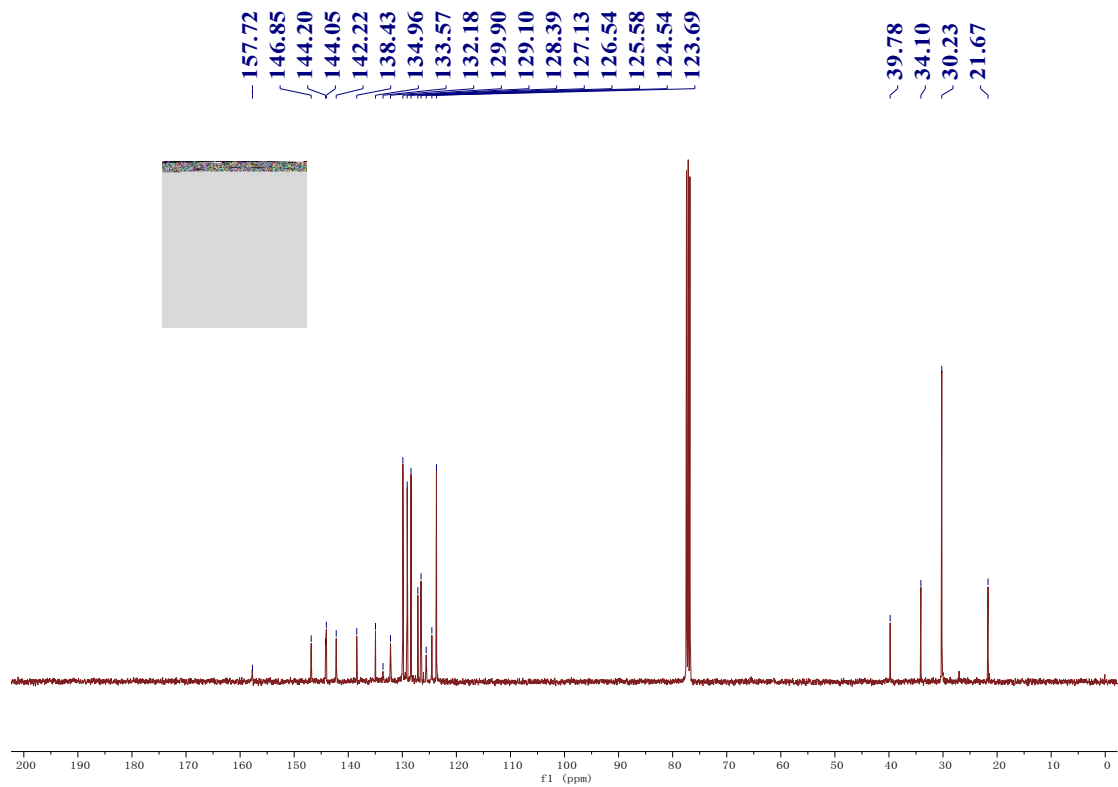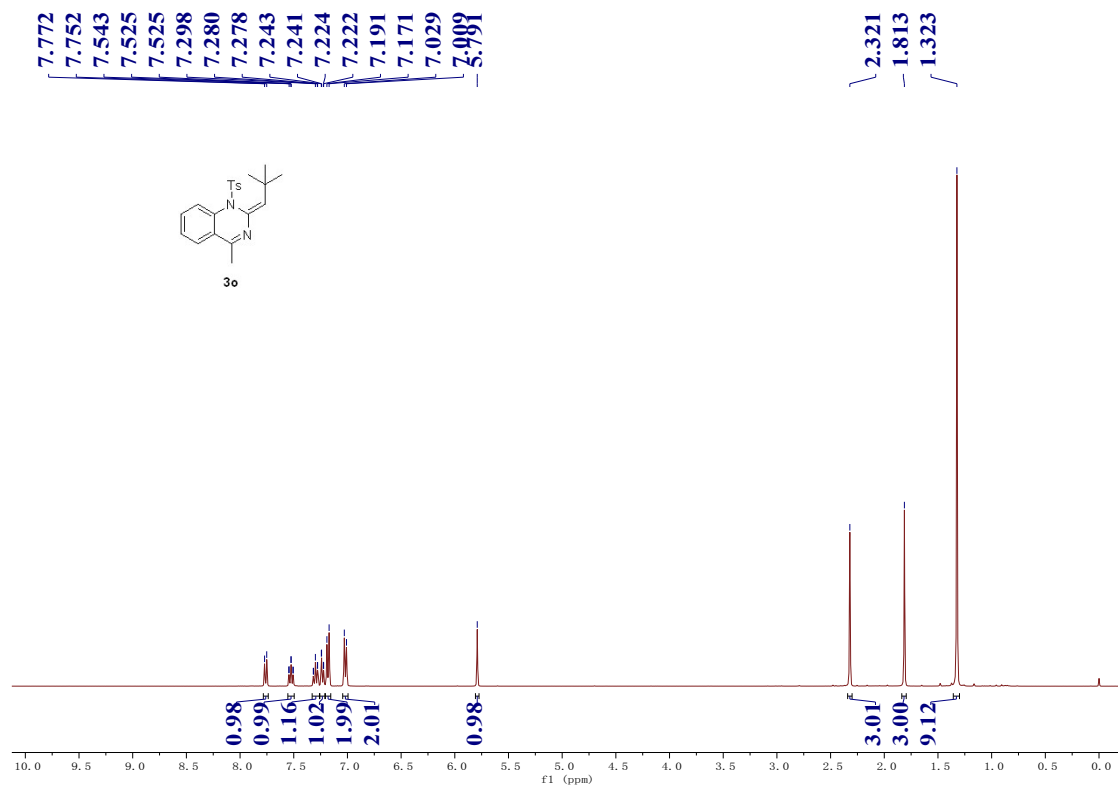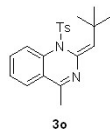

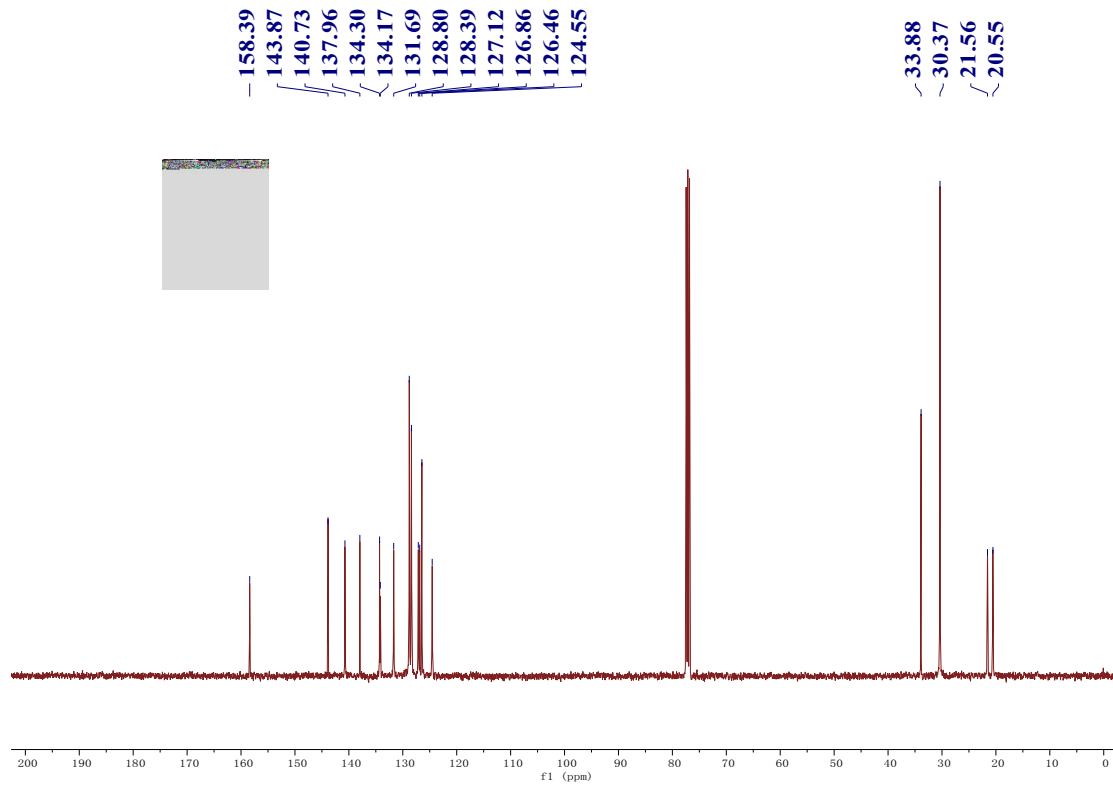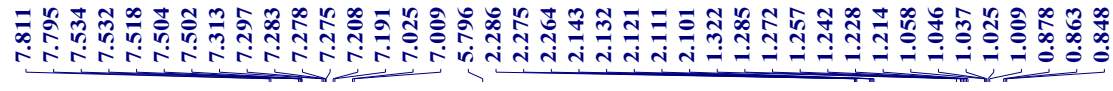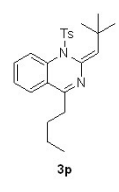



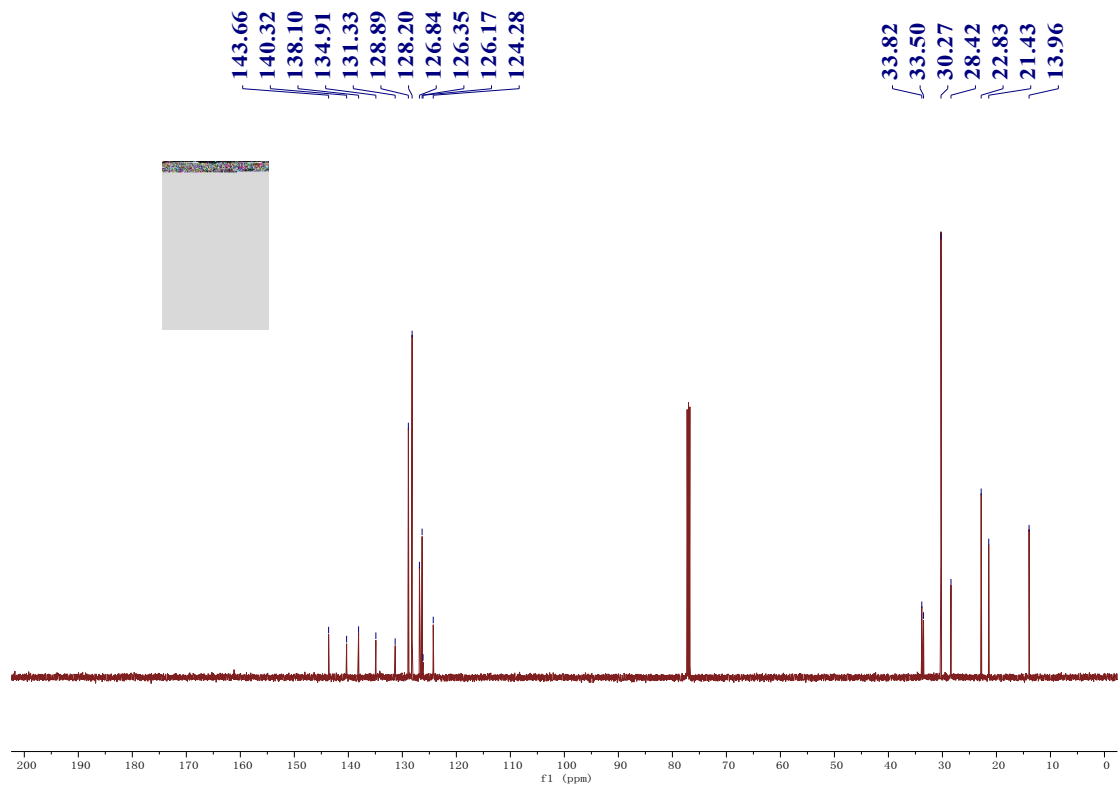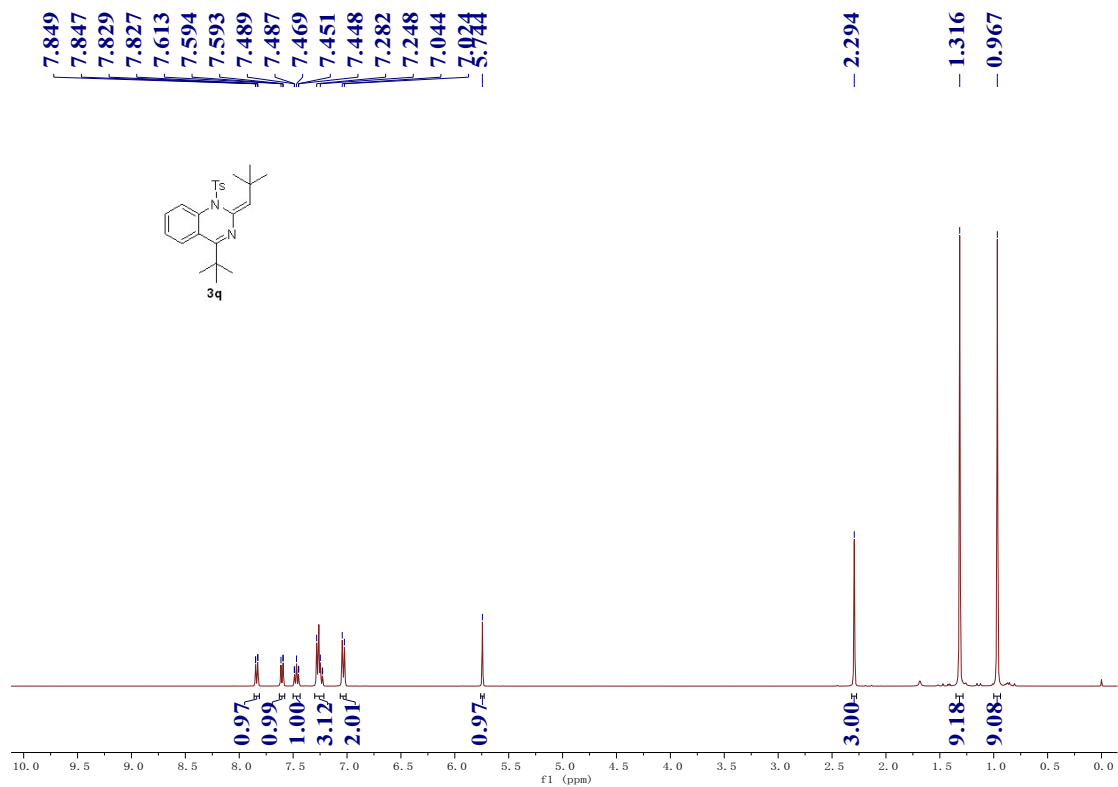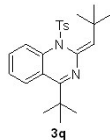

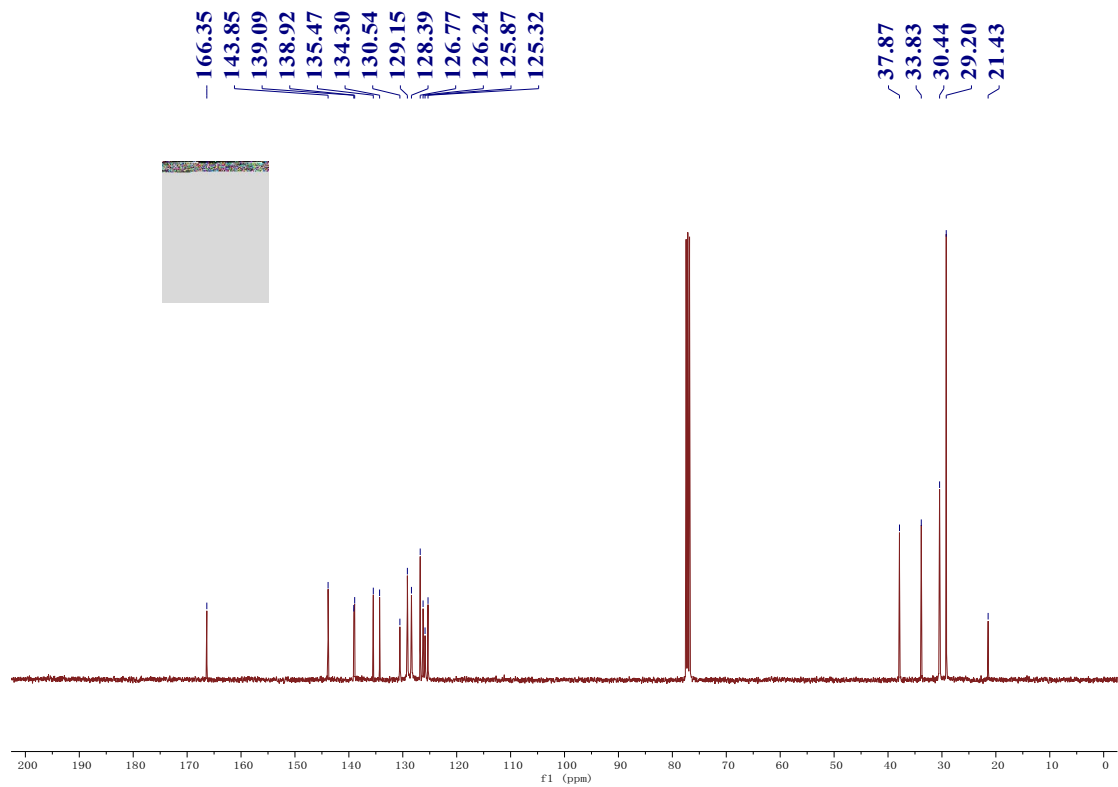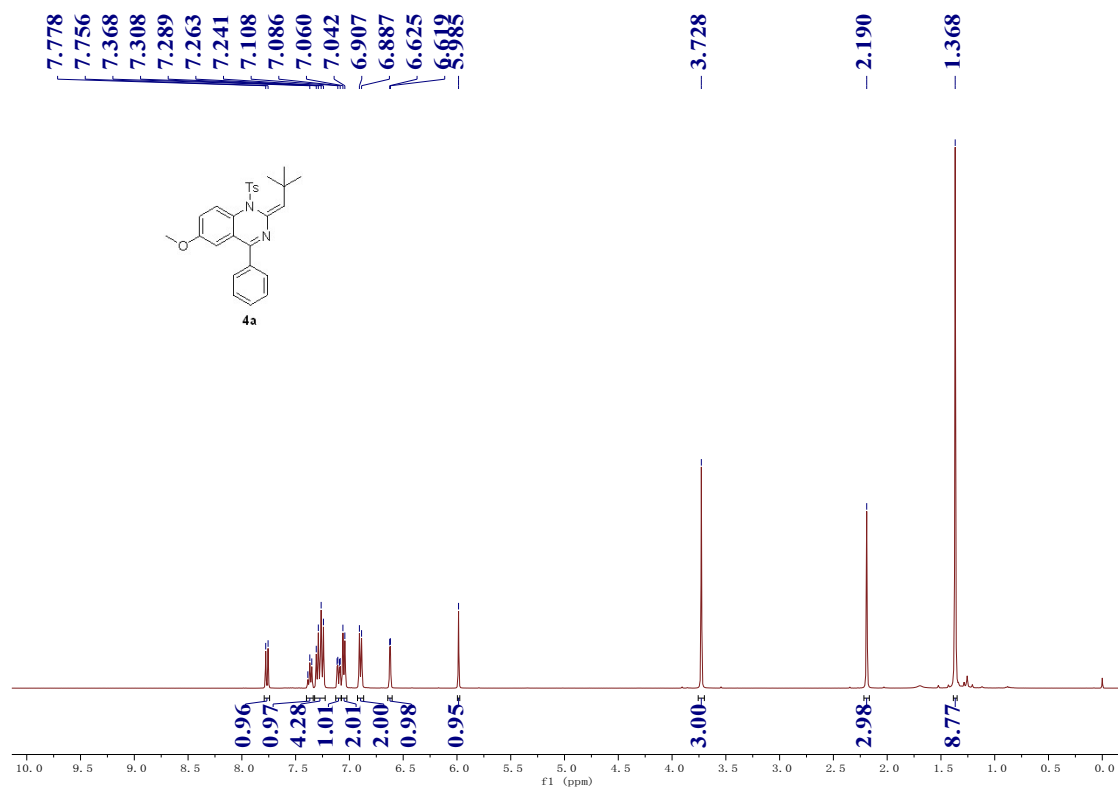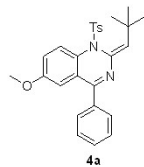

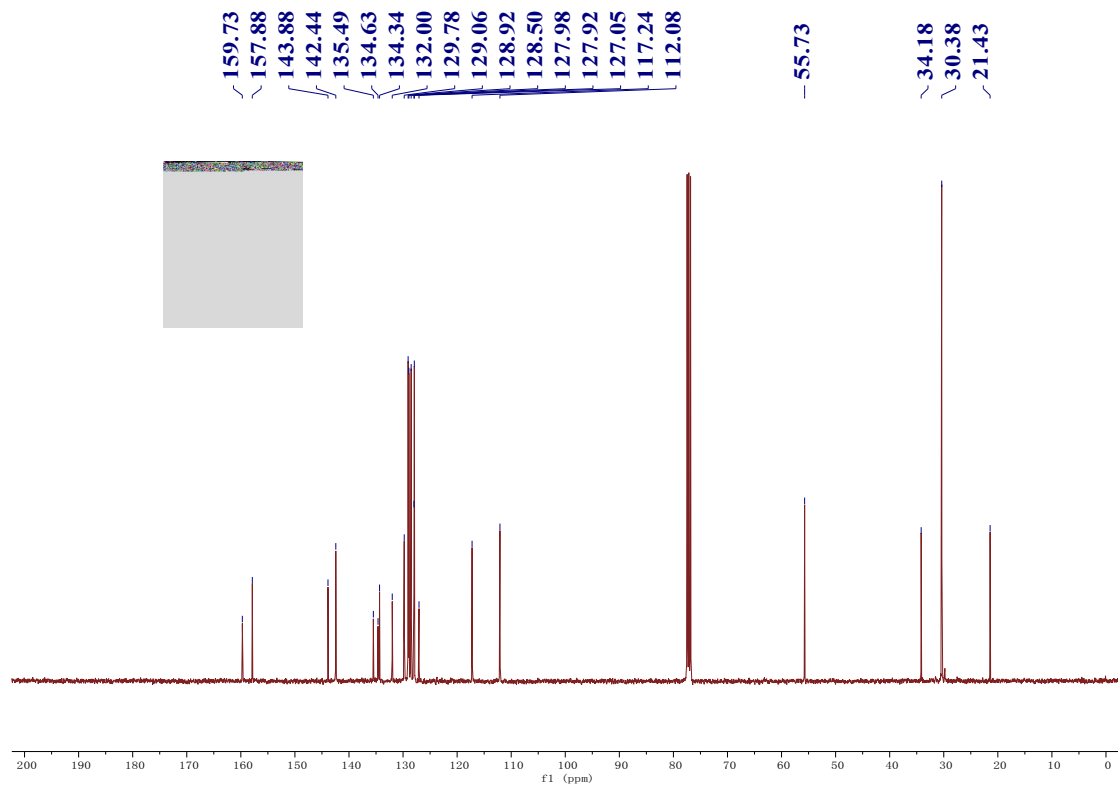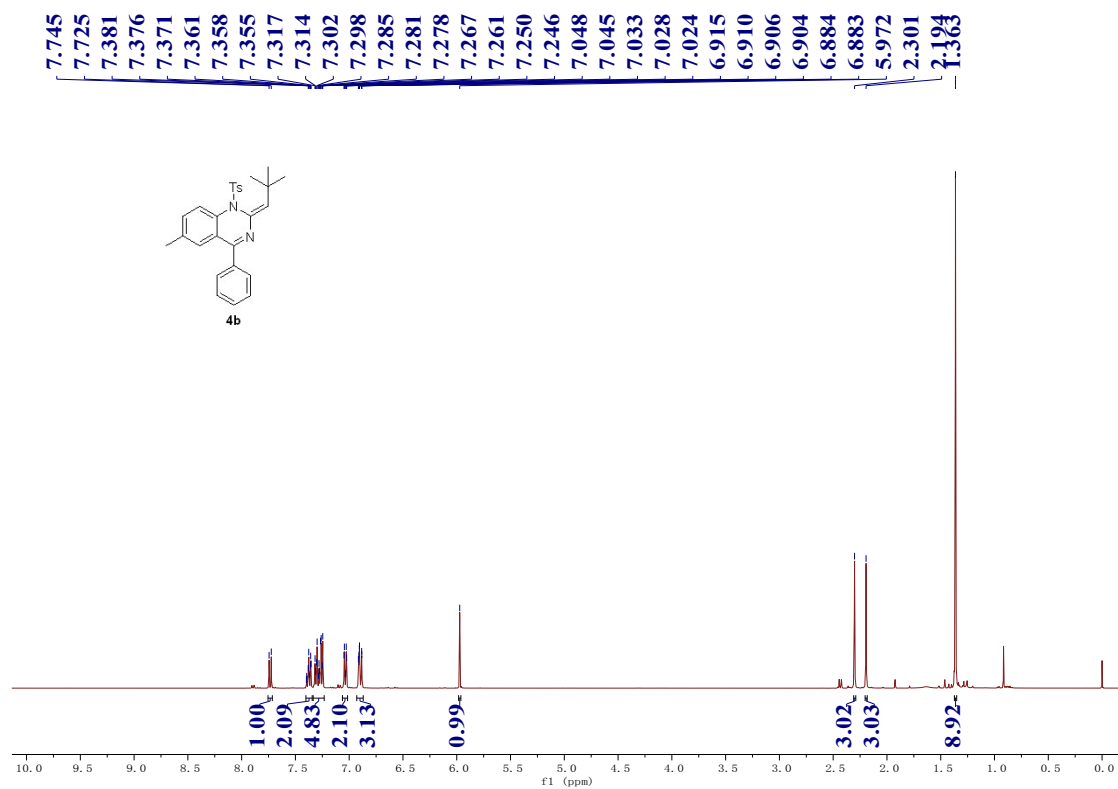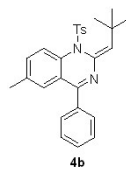

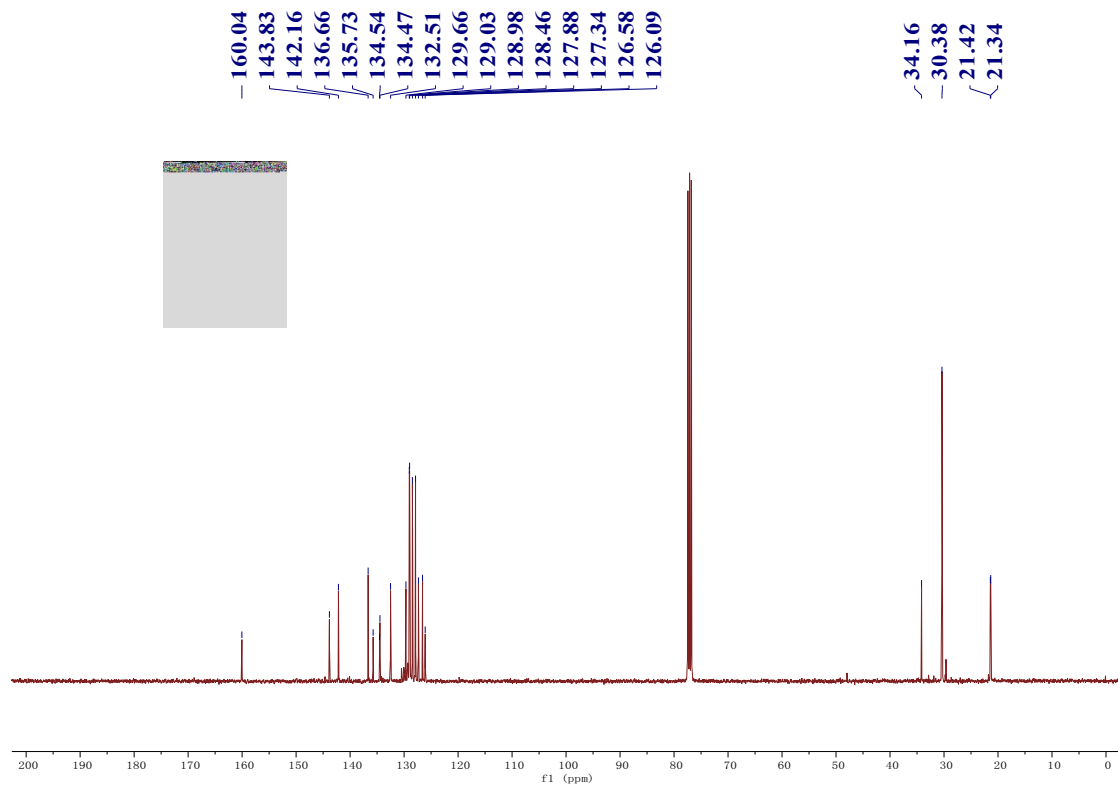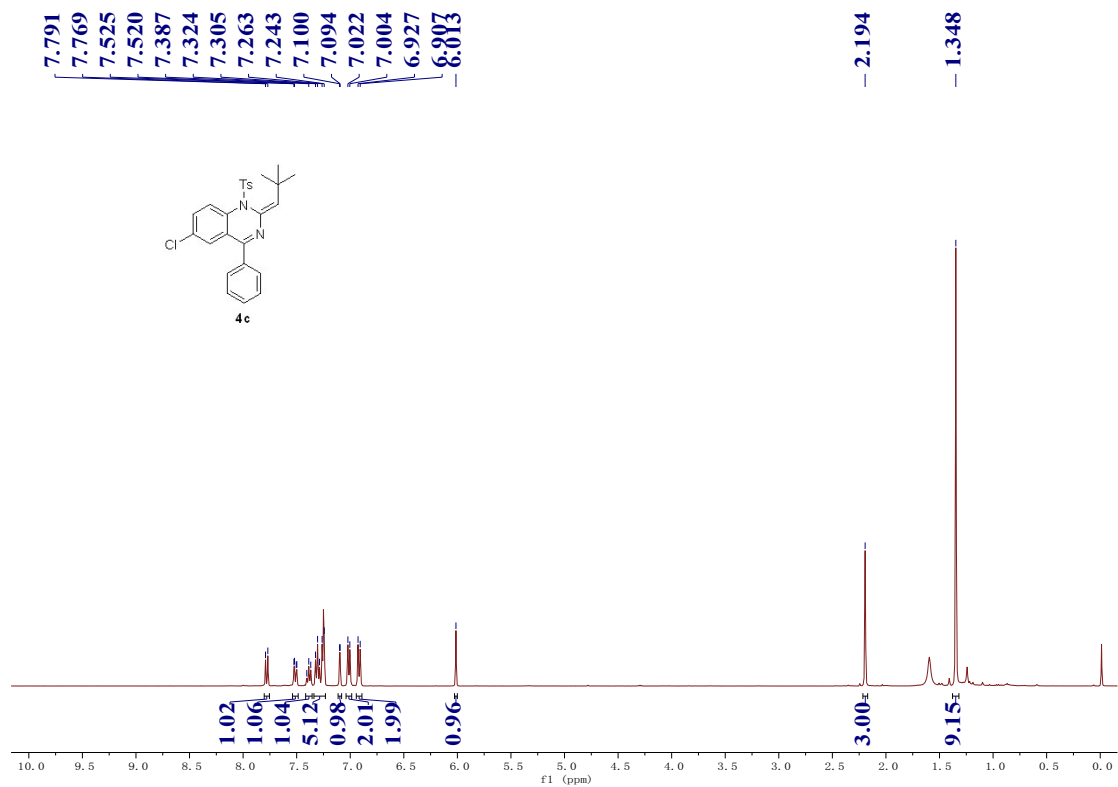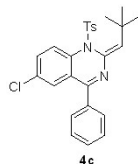

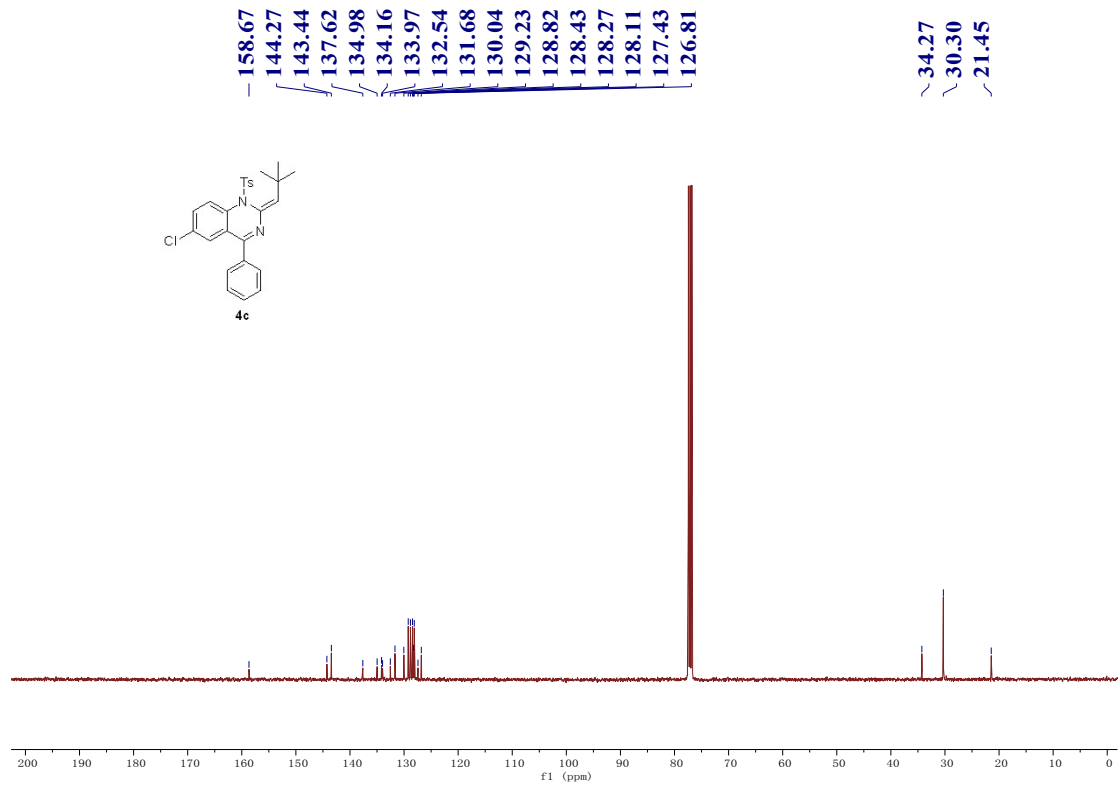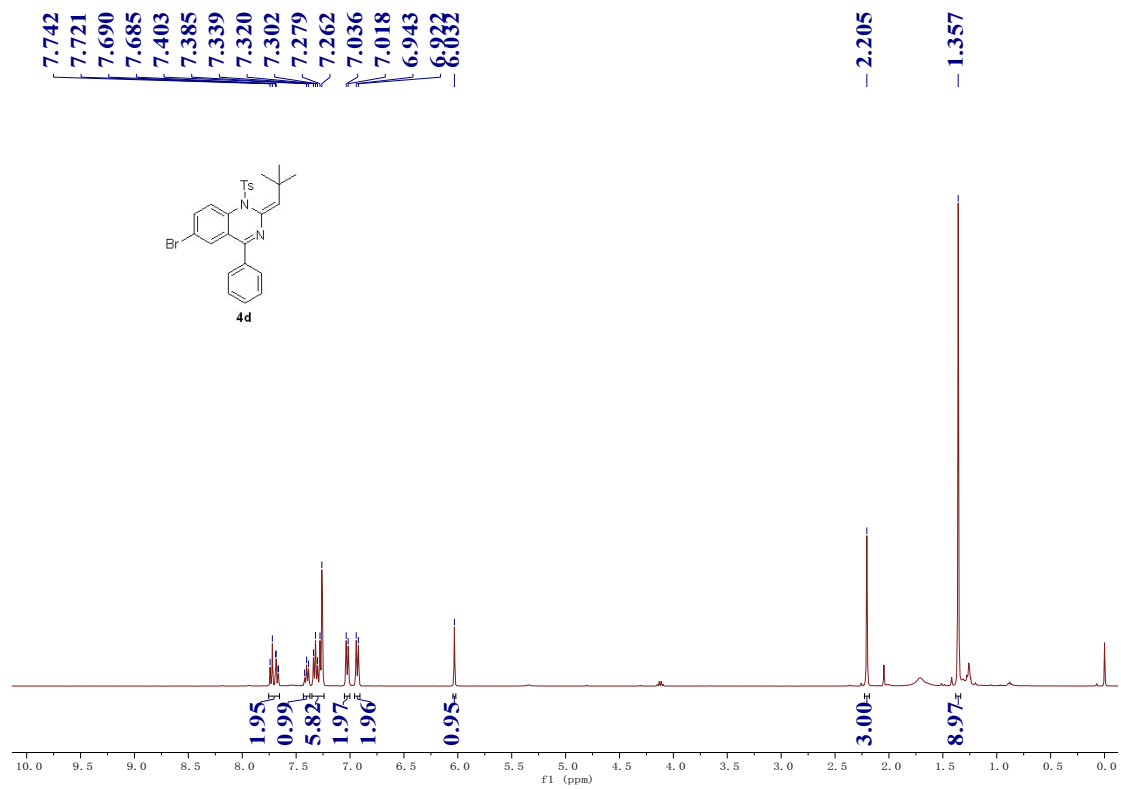

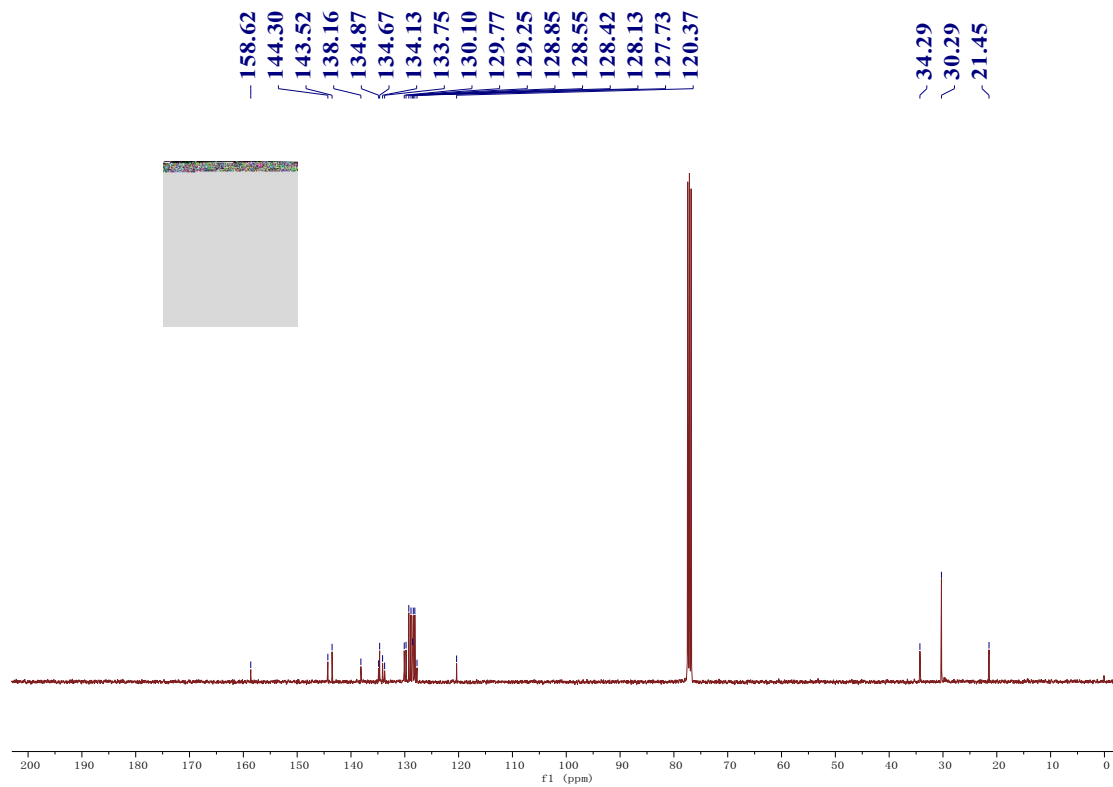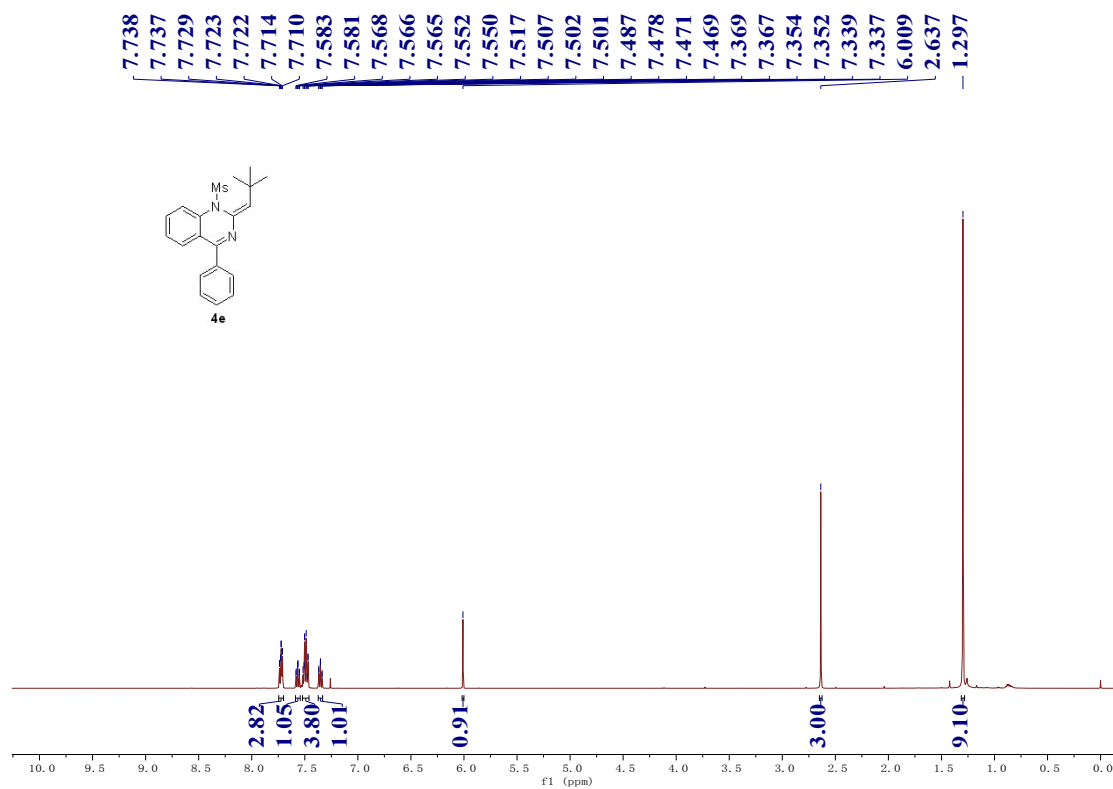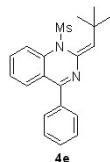

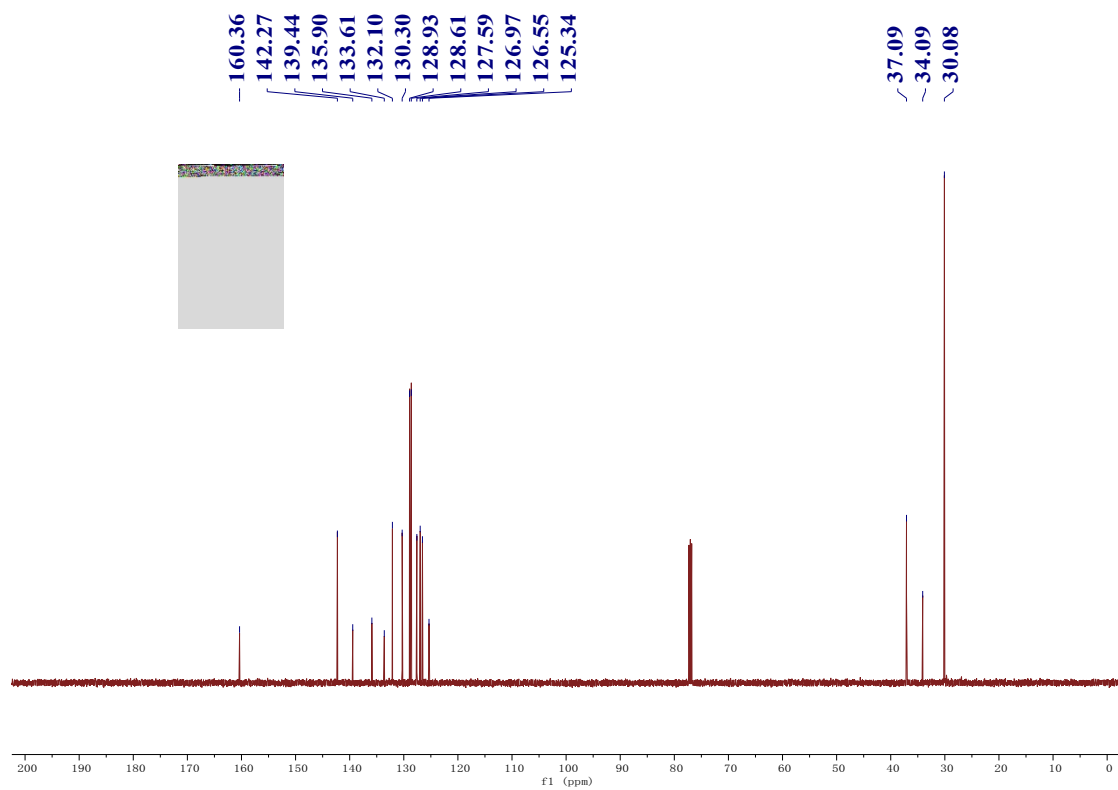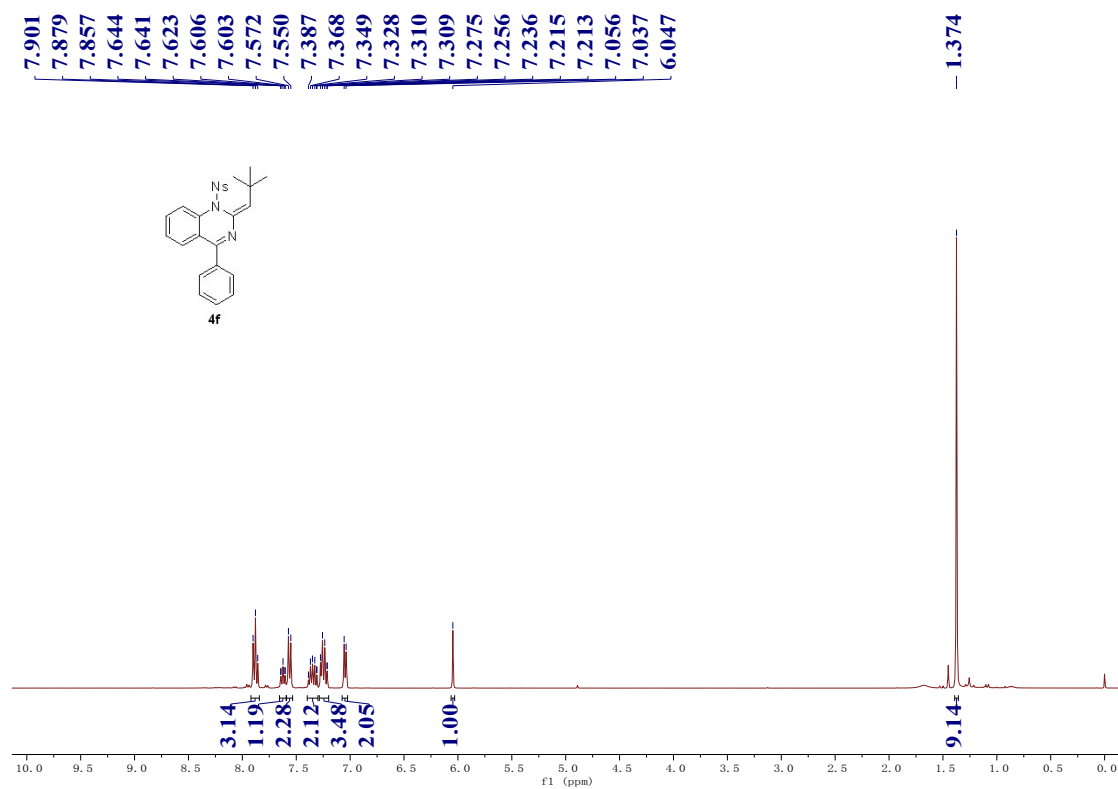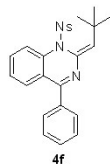

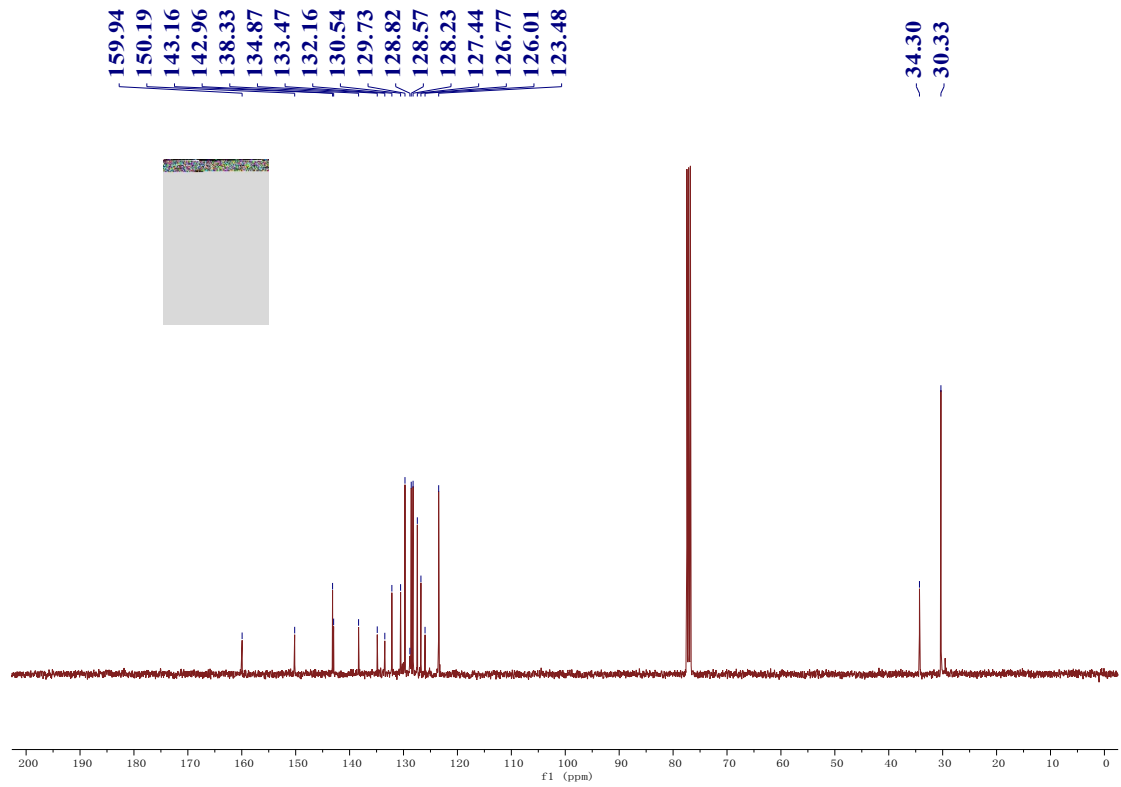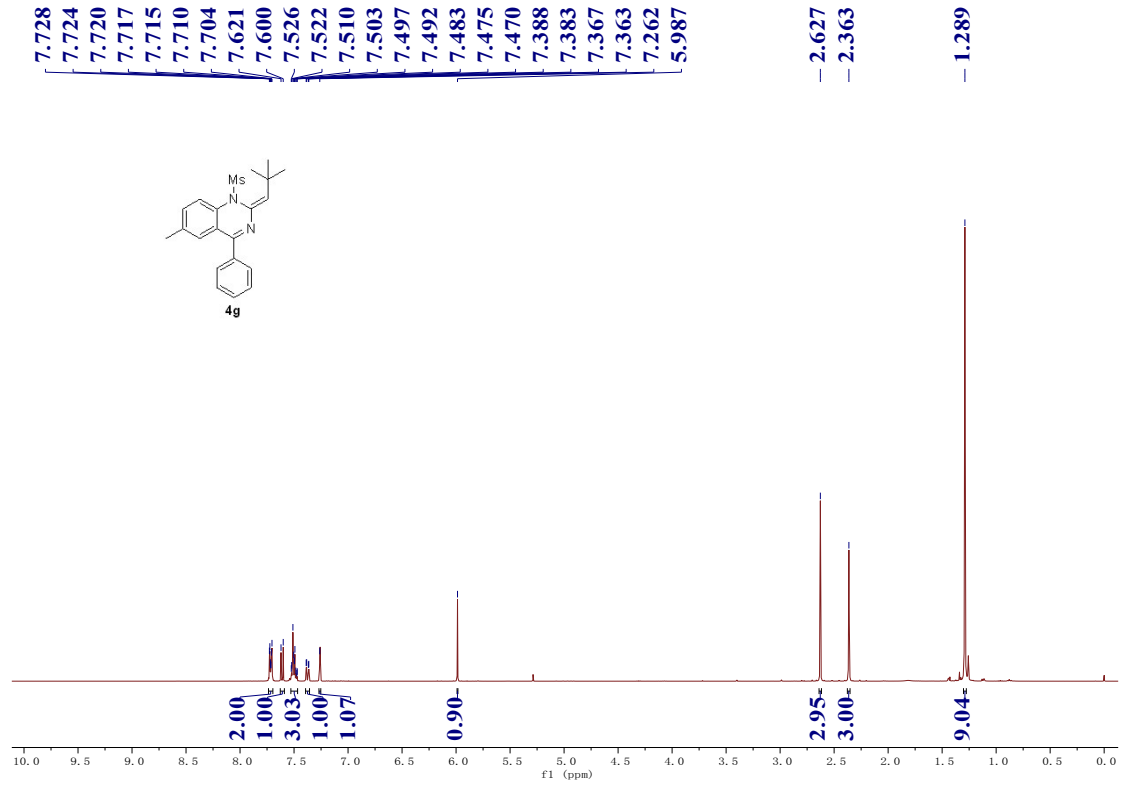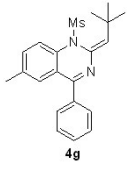



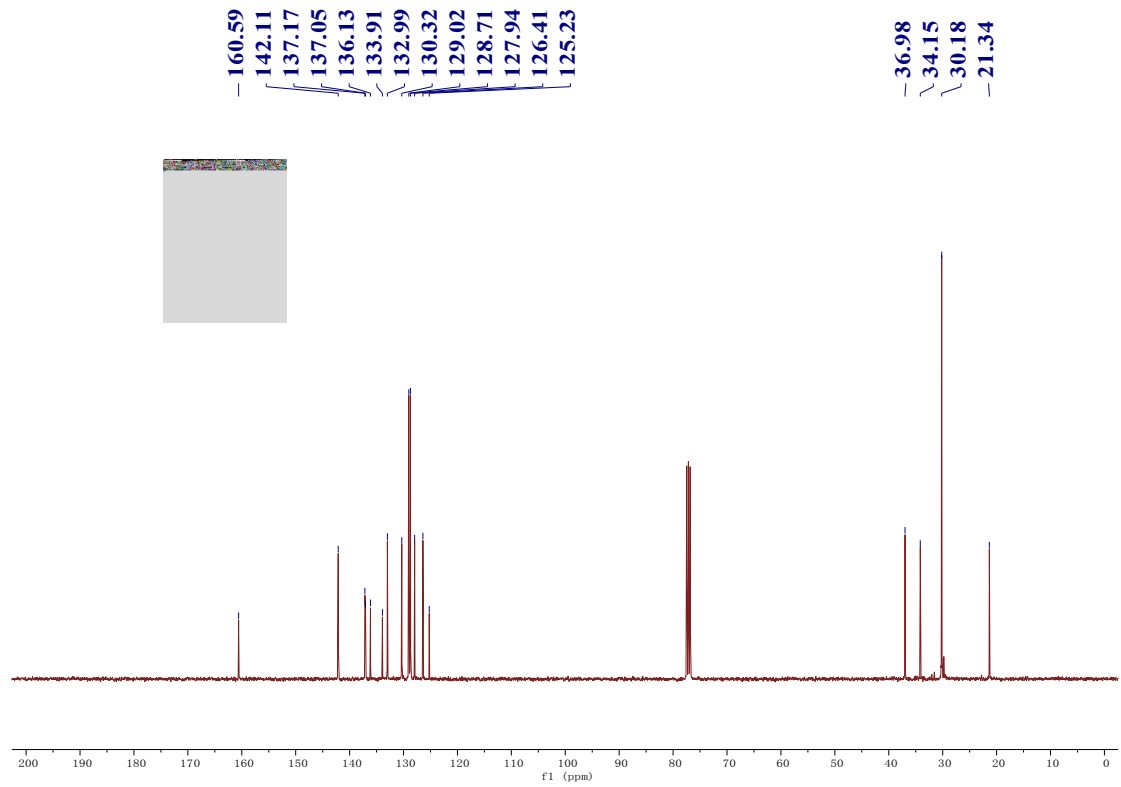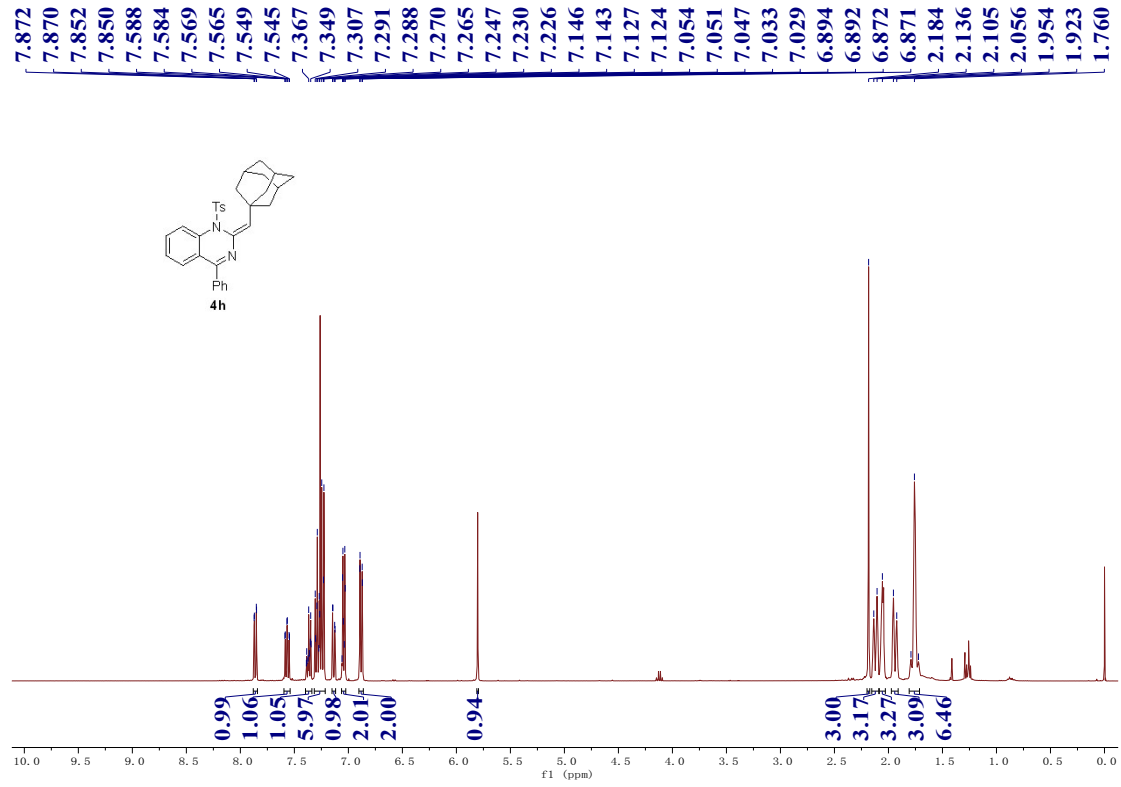

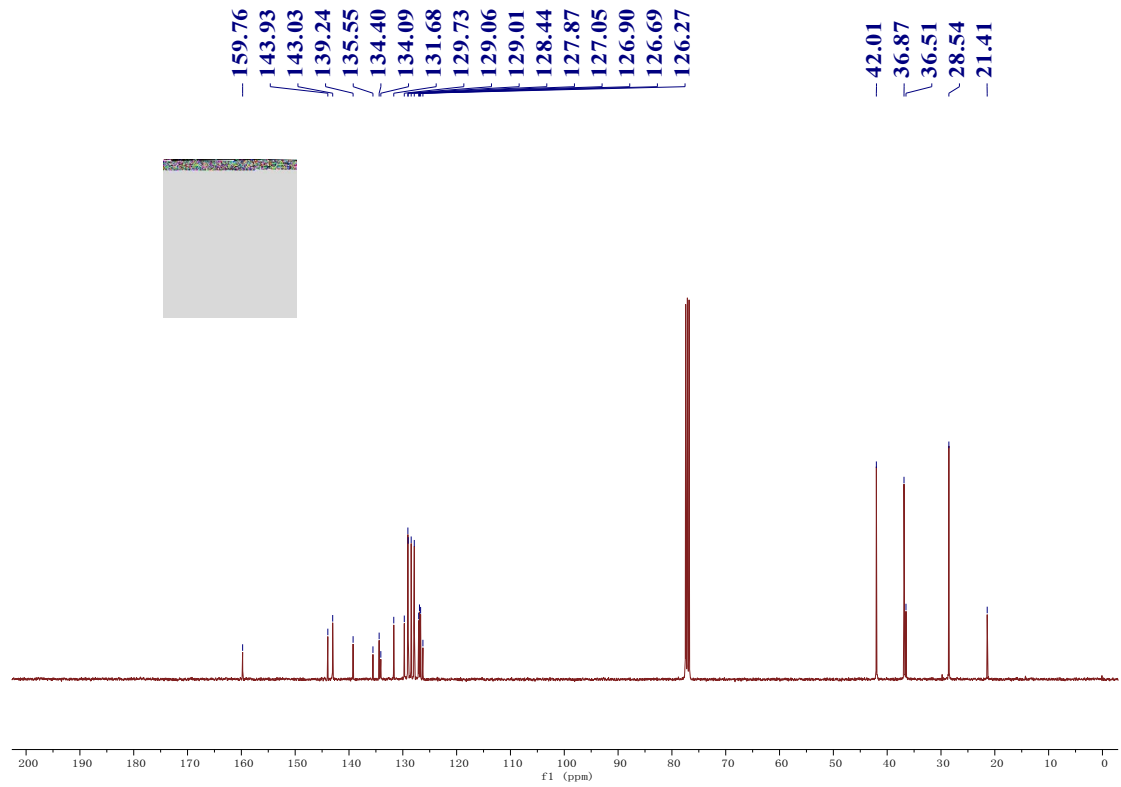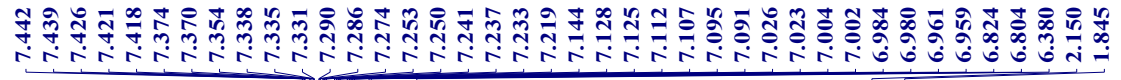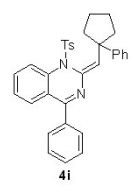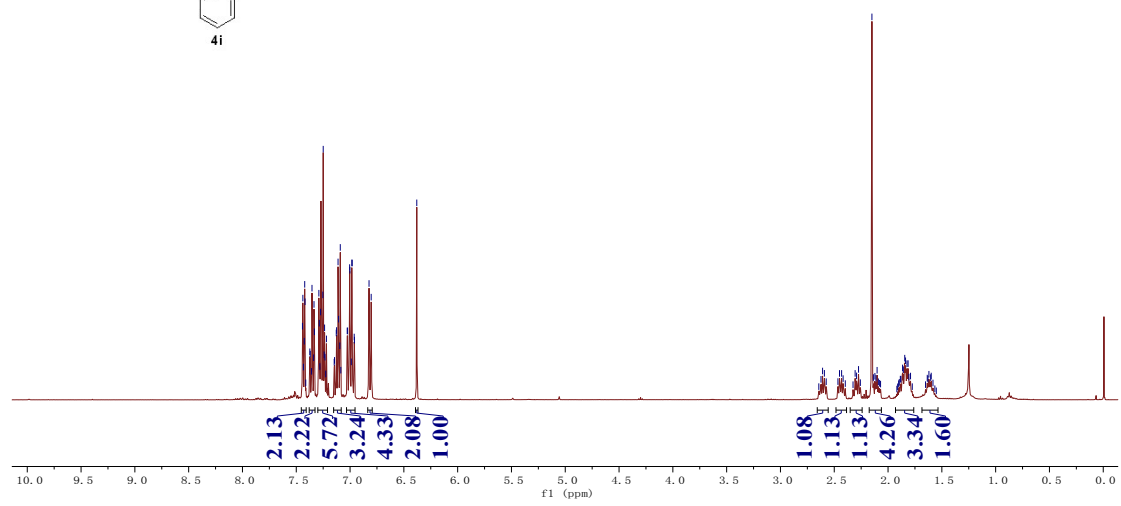

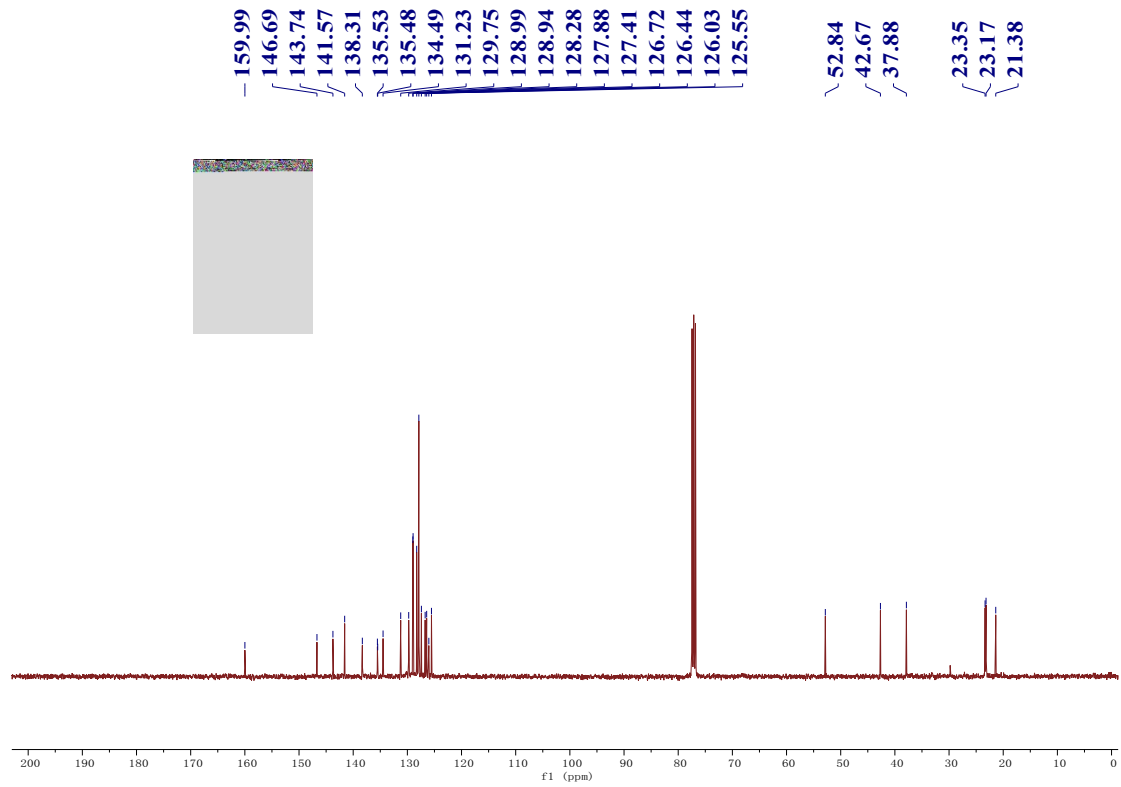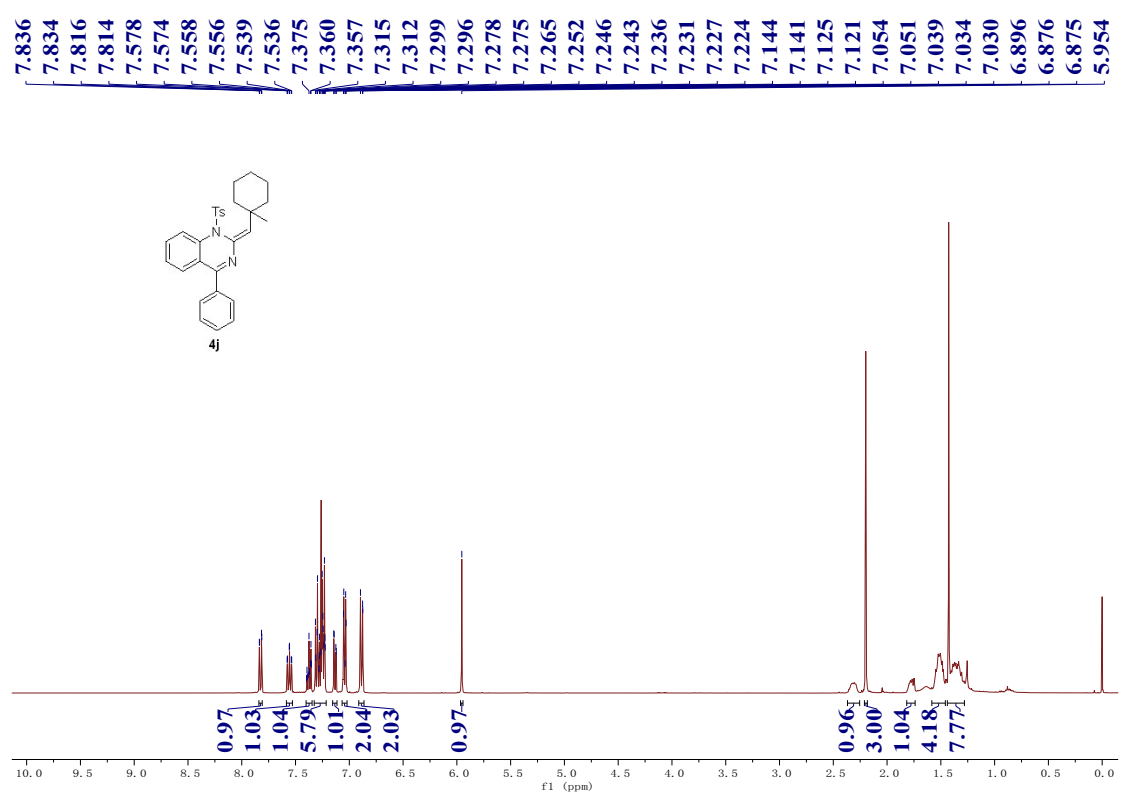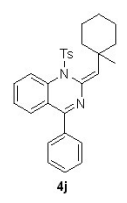

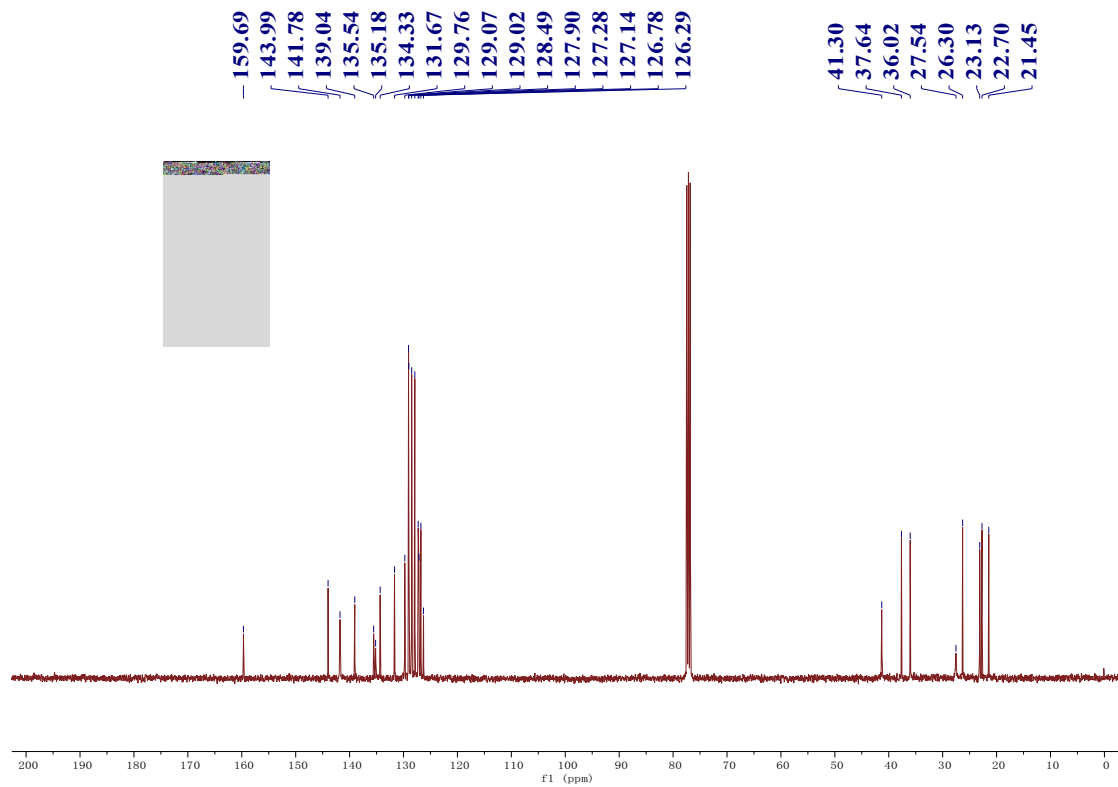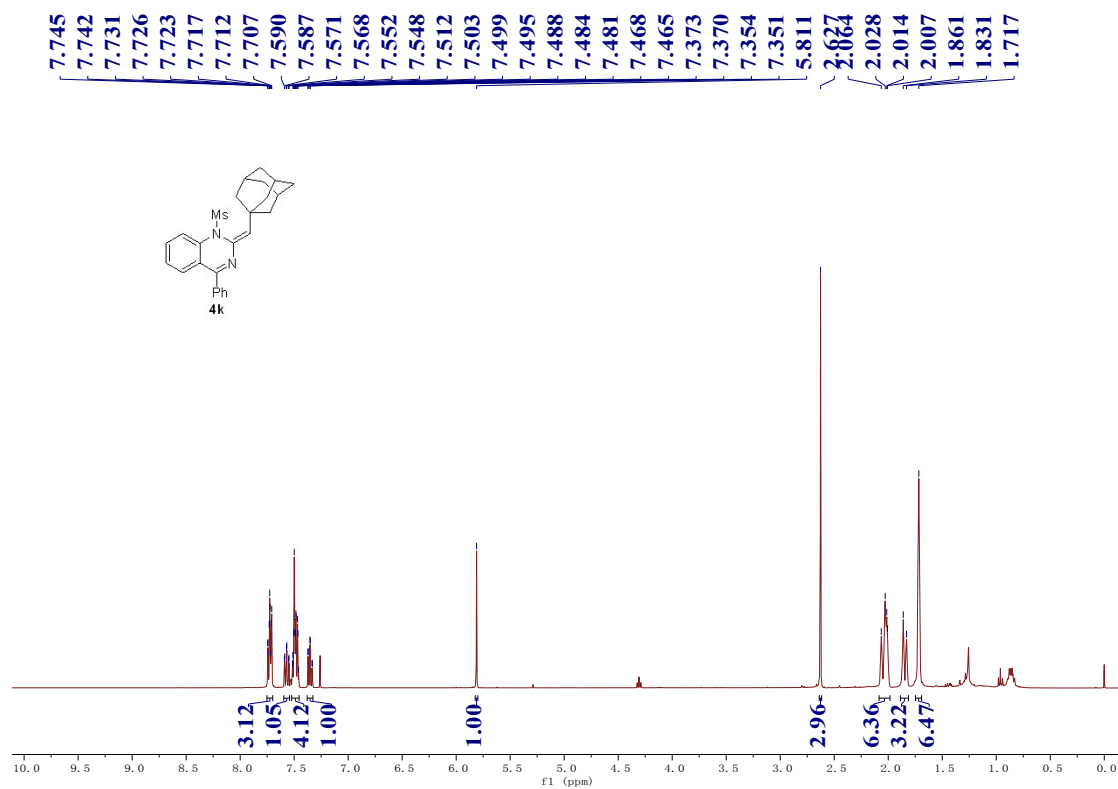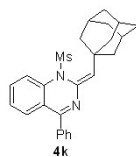

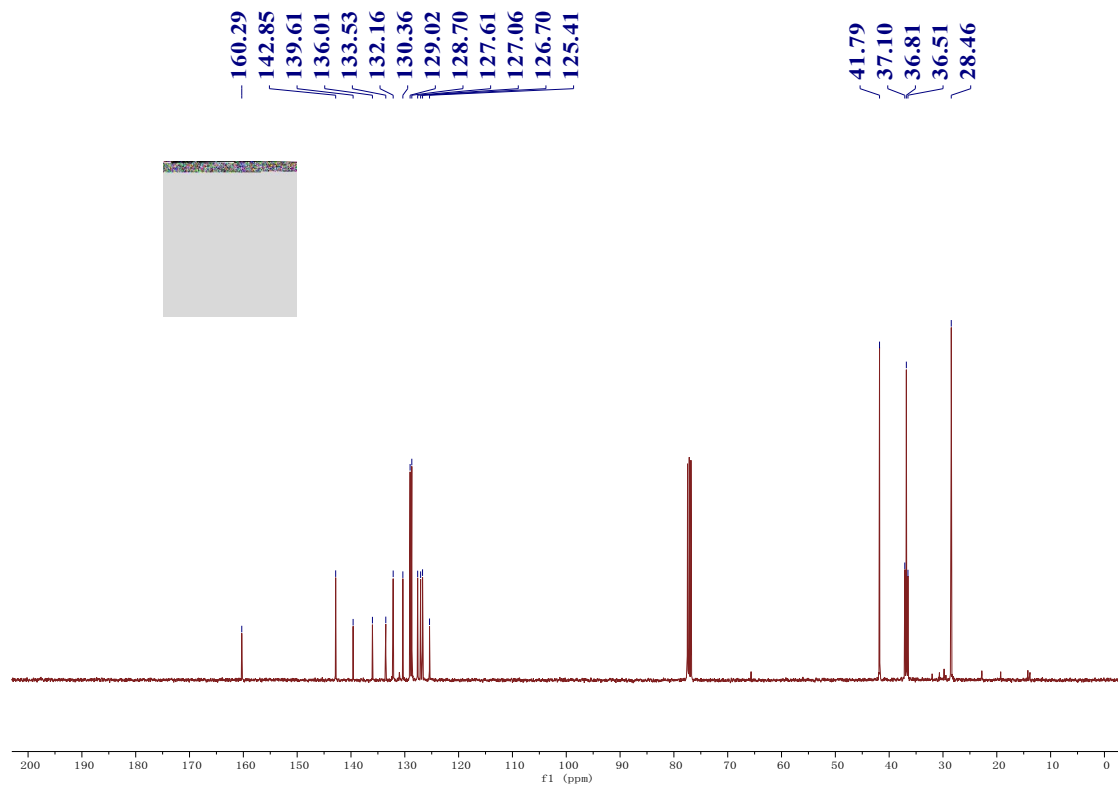

Supplement: c9ob01395d1.pdf [file c9ob01395d1.pdf]
